# Supplementary material
Source: PubMed Central journal article supplement (PMC11005960)
Supplement: ehp13435.s001.acco.pdf [file ehp13435.s001.acco.pdf]

**Note to readers with disabilities:** *EHP* strives to ensure that all journal content is accessible to all readers. However, some figures and Supplemental Material published in *EHP* articles may not conform to [508 standards](#) due to the complexity of the information being presented. If you need assistance accessing journal content, please contact [ehp508@niehs.nih.gov](mailto:ehp508@niehs.nih.gov). Our staff will work with you to assess and meet your accessibility needs within 3 working days.

### **Supplemental Material**

#### ***In Vivo* Tissue Distribution of Polystyrene or Mixed Polymer Microspheres and Metabolomic Analysis after Oral Exposure in Mice**

Marcus M. Garcia, Aaron S. Romero, Seth D. Merkley, Jewel L. Meyer-Hagen, Charles Forbes, Eliane El Hayek, David P. Sciezka, Rachel Templeton, Jorge Gonzalez-Estrella, Yan Jin, Haiwei Gu, Angelica Benavidez, Russell P. Hunter, Selita Lucas, Guy Herbert, Kyle Joohyung Kim, Julia Yue Cui, Rama R. Gullapalli, Julie G. In, Matthew J. Campen, and Eliseo F. Castillo

#### **Table of Contents**

**Figure S1.** Raman Spectroscopy in the liver.

**Figure S2.** Targeted metabolomics in colon.

**Figure S3.** Targeted metabolomics in liver.

**Figure S4.** Targeted metabolomics in brain.

**Table S1.** Untargeted metabolomics analysis in colon tissue of mice exposed to polystyrene (2mg/week);  $p = 0.05$ . Data can be found in supplemental Excel Table S1.

**Table S2.** Untargeted metabolomic analysis in colon tissue of mice exposed to polystyrene (4mg/week);  $p = 0.05$ . Data can be found in supplemental Excel Table S2.

**Table S3.** Untargeted metabolomic analysis in colon tissue of mice exposed to mixed polymer (2mg/week);  $p = 0.05$ . Data can be found in supplemental Excel Table S3.

**Table S4.** Untargeted metabolomic analysis in colon tissue of mice exposed to mixed polymer microspheres (4mg/week);  $p = 0.05$ . Data can be found in supplemental Excel Table S4.

**Table S5.** Untargeted metabolomic analysis in liver tissue of mice exposed to polystyrene (2mg/week);  $p = 0.05$ . Data can be found in supplemental Excel Table S5.

**Table S6.** Untargeted metabolomic analysis in liver tissue of mice exposed to polystyrene (4mg/week);  $p = 0.05$ . Data can be found in supplemental Excel Table S6.

**Table S7.** Untargeted metabolomic analysis in liver tissue of mice exposed to mixed polymer (2mg/week);  $p = 0.05$ . Data can be found in supplemental Excel Table S7.

**Table S8.** Untargeted metabolomic analysis in liver tissue of mice exposed to mixed polymer (4mg/week);  $p = 0.05$ . Data can be found in supplemental Excel Table S8.

**Table S9.** Untargeted metabolomic analysis in brain tissue of mice exposed to polystyrene (2mg/week);  $p = 0.05$ . Data can be found in supplemental Excel Table S9.

**Table S10.** Untargeted metabolomic analysis in brain tissue of mice exposed to polystyrene (4mg/week);  $p = 0.05$ . Data can be found in supplemental Excel Table S10.

**Table S11.** Untargeted metabolomic analysis in brain tissue exposed to mixed polymer (2mg/week);  $p = 0.05$ . Data can be found in supplemental Excel Table S11.

**Table S12.** Untargeted metabolomic analysis in brain tissue of mice exposed to mixed polymer (4mg/week);  $p = 0.05$ . Data can be found in supplemental Excel Table S12.

**Table S13.** Targeted Metabolomics of Colon in Mice Exposed to Polystyrene showing significantly altered metabolites for concentrations A) 2mg/week and B) 4mg/week.

**Table S14.** Targeted Metabolomics of Colon in Mice Exposed to Mixed Polymer showing significantly altered metabolites for concentrations A) 2mg/week and B) 4mg/week.

**Additional File-** Excel Document

**Figure S1.**

**A. Raman Data - Brain**

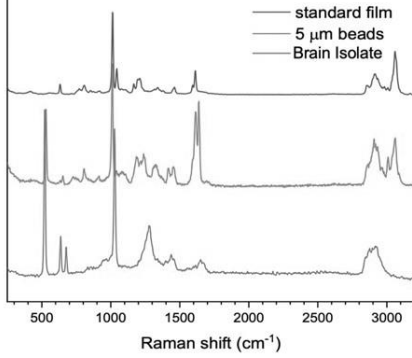

**B. Raman Data – PS KOH**

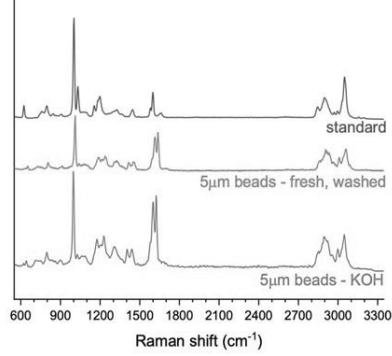

**C. XPS Data - PS**

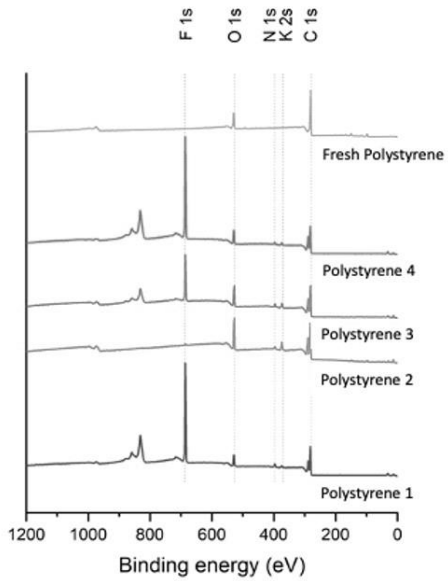

**D. Elemental Expression - PS**

| Liver Polystyrene Exposure      | C 1s% | F 1s% | K 1s% | N 1s% | O 1s% |
|---------------------------------|-------|-------|-------|-------|-------|
| Polystyrene 1                   | 54.21 | 34.30 | 2.31  | 2.79  | 6.39  |
| Polystyrene 2                   | 75.02 | 0.83  | 8.48  | 2.20  | 13.48 |
| Polystyrene 3                   | 64.05 | 19.22 | 5.08  | 2.34  | 9.30  |
| Polystyrene 4                   | 55.10 | 32.72 | 3.11  | 1.83  | 7.23  |
| Fresh Polystyrene (non-exposed) | 85.40 | 0.00  | 0.00  | 0.46  | 14.14 |

**E. Fresh PS**

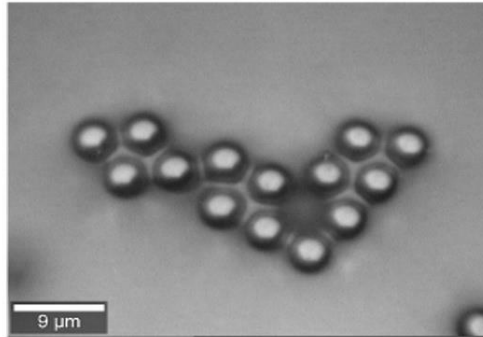

**Figure S1. Raman Spectroscopy in the liver.** A) Raman spectra of polystyrene microspheres isolated from brain isolates compared to fresh 5  $\mu\text{m}$  polystyrene microspheres and standard library film polystyrene. Brain tissue was isolated from mice exposed twice a week for 4 weeks to 2 or 4 mg 5  $\mu\text{m}$  polystyrene microspheres. B) Raman Spectroscopy of 5  $\mu\text{m}$  polystyrene microspheres exposed to potassium hydroxide (KOH) digestion compared to fresh 5  $\mu\text{m}$  polystyrene microspheres and standard library film polystyrene. C) XPS data comparing 4 representative polystyrene microspheres isolated from the liver of mice exposed twice a week for 4 weeks via oral gavage to fresh polystyrene microspheres at both 2mg/week and 4mg/week exposure groups. Polystyrene 1 and Polystyrene 2 were representative of mice exposed to polystyrene at the 2mg/week dose. Polystyrene 3 and Polystyrene 4 were representative of mice exposed to polystyrene at the 4mg/week. D) Elemental expression of each polystyrene sample isolated from the liver of exposed mice compared to fresh polystyrene microspheres. E) Visualization of fresh polystyrene microspheres used for XPS Analysis (60x magnification).

Figure S2.

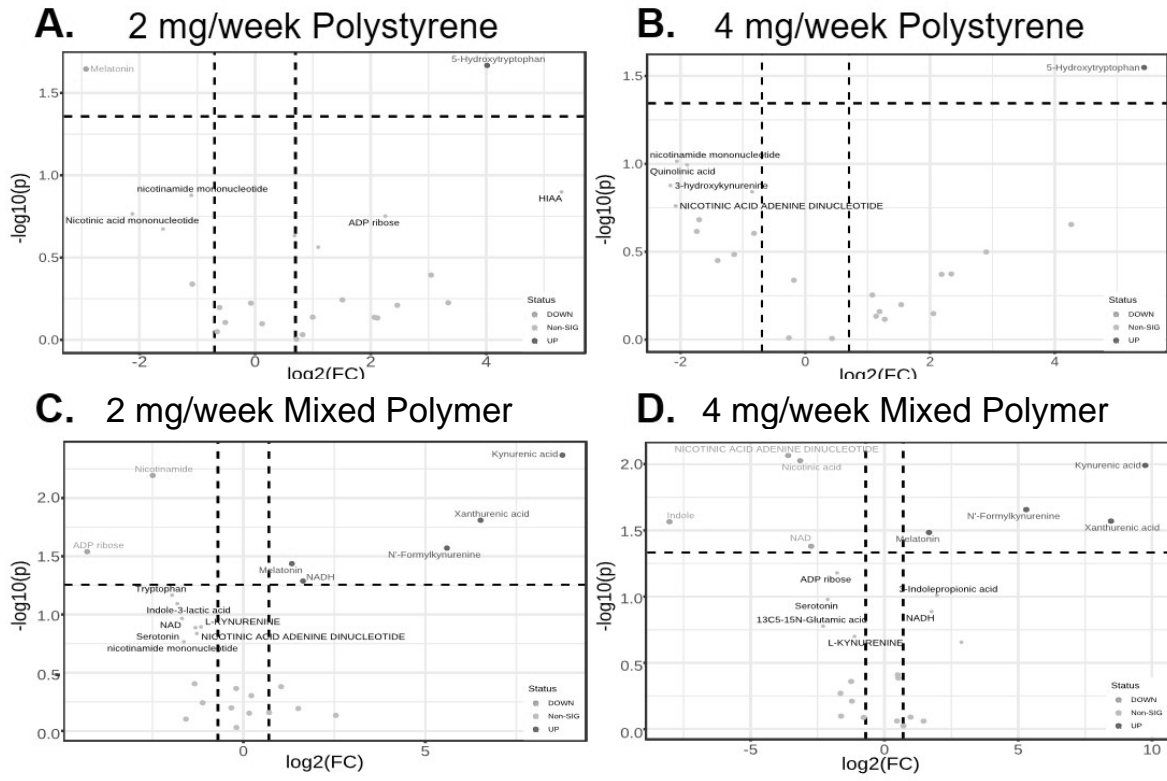

**Figure S2. Targeted metabolomics in colon.** Volcano plots of targeted metabolomic analysis in the colon of mice exposed to A) 2 mg/week polystyrene (5  $\mu\text{m}$ ), B) 4 mg/week polystyrene, C) 2 mg/week mixed polymer (5  $\mu\text{m}$ ), and D) 4 mg/week mixed polymer. Exposures were four weeks in duration twice weekly via oral gavage. Mixed polymer: polystyrene, polyethylene, and poly-(lactic-co-glycolic acid) microspheres. Exposure groups were compared to 0 mg/week controls. Data are plotted as log(2) fold change ( $p < 0.05$ ;  $n=8$  per group). Summary data can be found in Excel Tables S3 and S4.

Figure S3.

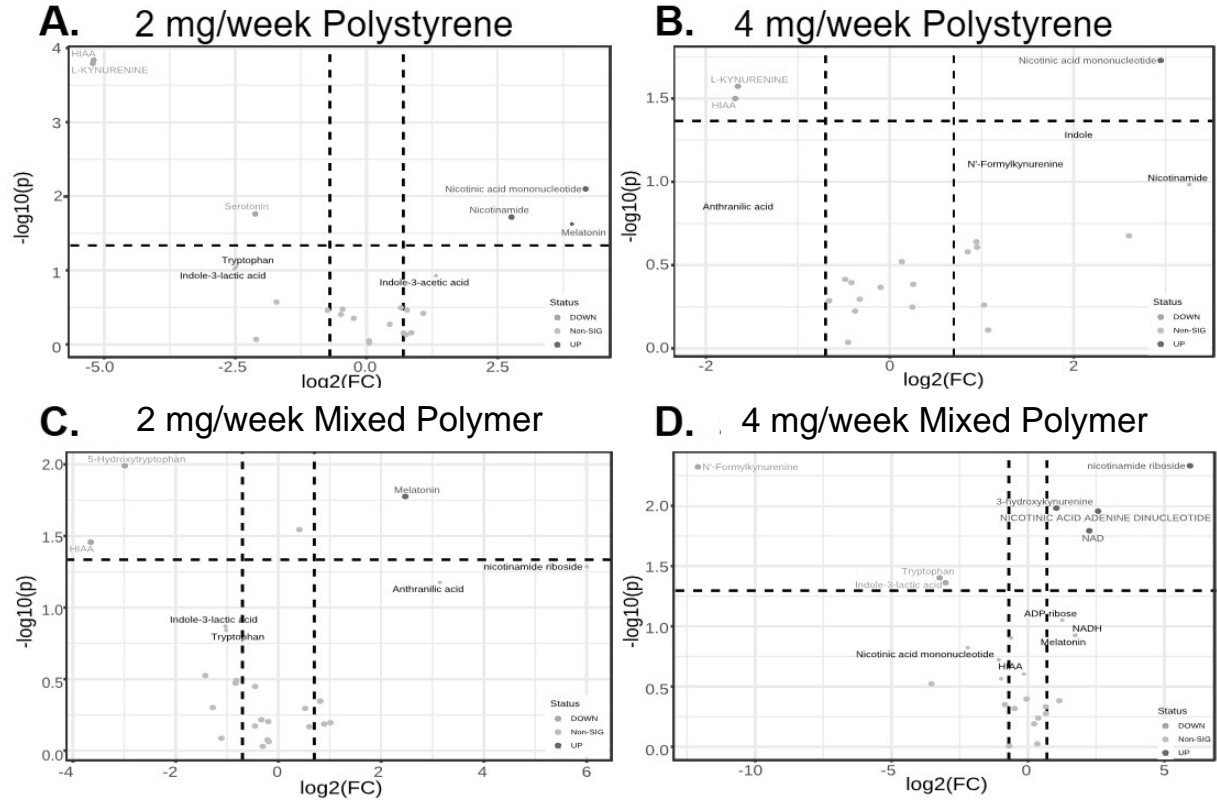

**Figure S3. Targeted metabolomics in liver.** Volcano plots showing targeted metabolomic analysis of livers from mice exposed to A) 2 mg/week polystyrene, B) 4 mg/week polystyrene C) 2 mg/week mixed polymer, or D) 4 mg/week mixed polymer. Exposures were four weeks in duration twice weekly via oral gavage. Mixed polymer: polystyrene, polyethylene, and poly-(lactic-co-glycolic acid) microspheres. Exposure groups were compared to 0 mg/week controls. Data are plotted as log<sub>2</sub> fold change (p < 0.05; n=8 per group). Summary data can be found in Excel Tables S7 and S8.



Figure S4.

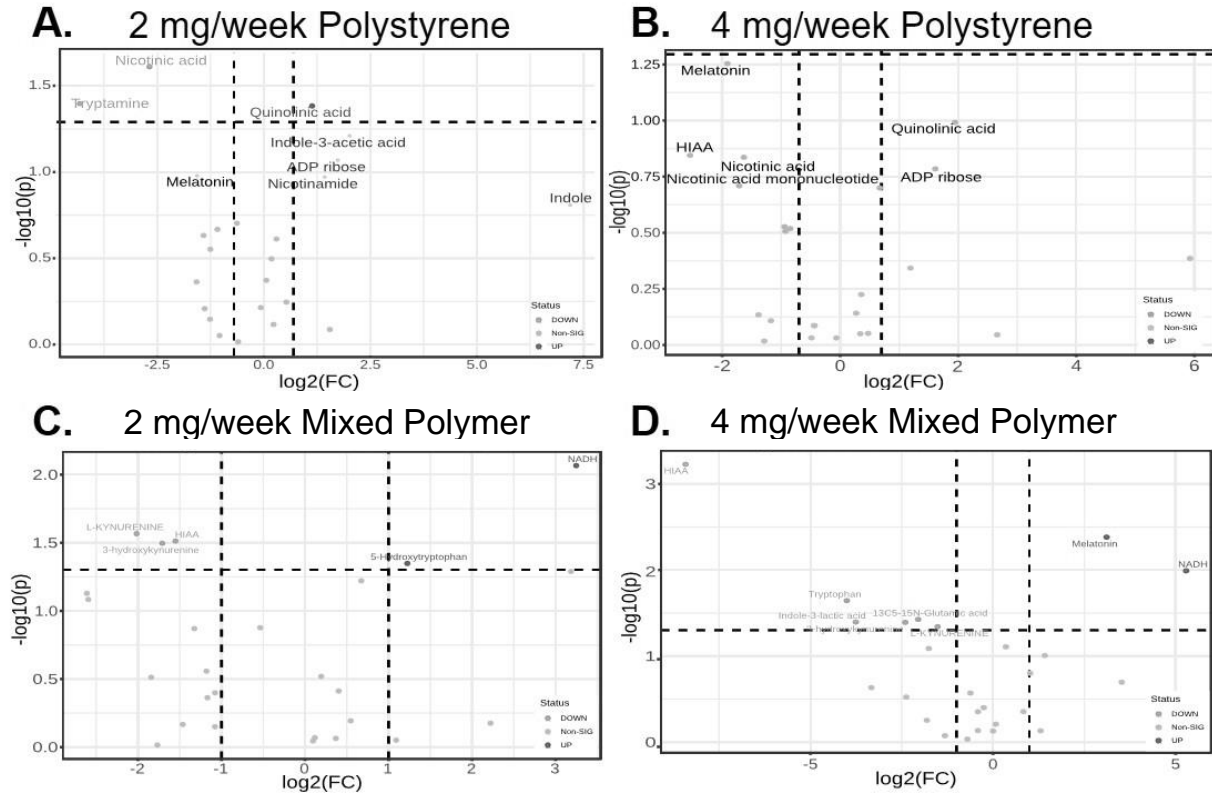

**Figure S4. Targeted metabolomics in brain.** Volcano plots showing targeted metabolomic analysis of brain isolates from mice exposed to A) 2 mg/week polystyrene, B) 4 mg/week polystyrene C) 2 mg/week mixed polymer, or D) 4 mg/week mixed polymer. Exposures were four weeks in duration twice weekly via oral gavage. Mixed polymer consisted of polystyrene, polyethylene, and poly-(lactic-co-glycolic acid) microspheres. Exposure groups were compared to 0 mg/week controls. Data are plotted as log(2) fold change ( $p < 0.05$ ;  $n=8$  per group). Summary data can be found in Excel Tables S11 and S12.

Tables S1 through S12 are also available in the supplemental Excel file as Excel Tables S15 through S27.

**Table S1.**

| Untargeted Metabolomic Analysis in Colon Tissue of Mice Exposed to Polystyrene (2mg/week) p = 0.05                      | FC       | log2(FC) | raw.pval   | -LOG10(p) |
|-------------------------------------------------------------------------------------------------------------------------|----------|----------|------------|-----------|
| <b>Lower</b>                                                                                                            |          |          |            |           |
| hexahydro-2-oxo-1h-thieno(3,4-d)imidazole-4-pentanoic acid                                                              | 0.043836 | -4.5117  | 0.00028512 | 3.545     |
| Homocarnosine                                                                                                           | 0.05326  | -4.2308  | 0.00581    | 2.2358    |
| 2-(Acetylsulfamoyl)benzoic acid                                                                                         | 0.085277 | -3.5517  | 0.0067949  | 2.1678    |
| n-Hexanamide                                                                                                            | 0.093022 | -3.4263  | 0.003858   | 2.4136    |
| Carnosine                                                                                                               | 0.095824 | -3.3835  | 0.00049343 | 3.3068    |
| 2-Mercapto-3-methylbutan-1-ol                                                                                           | 0.098894 | -3.338   | 0.00618    | 2.209     |
| 4-Hydroxy-4-(methylnitrosoamino)-1-(3-pyridinyl)-1-butanone                                                             | 0.09993  | -3.3229  | 0.00501    | 2.3002    |
| 2-[(7-methyl-2,3-dihydro-1H-inden-4-yl)oxy]pyridin-3-amine                                                              | 0.09993  | -3.3229  | 0.00501    | 2.3002    |
| Zalcitabine                                                                                                             | 0.10351  | -3.2722  | 0.0065762  | 2.182     |
| MFCD12546417                                                                                                            | 0.11344  | -3.14    | 0.023667   | 1.6259    |
| EIPA                                                                                                                    | 0.11351  | -3.1392  | 0.0034265  | 2.4652    |
| 3-Hydroxysebacic acid                                                                                                   | 0.13861  | -2.8509  | 0.0024408  | 2.6125    |
| N-[(1S,3aS,5S,7aR)-7a-{3-[(2-Furylmethyl)amino]-3-oxopropyl}-5-hydroxy-3,3,5-trimethyloctahydro-1H-inden-1-yl]benzamide | 0.14429  | -2.7929  | 0.0087096  | 2.06      |
| 4-phenolsulfonic acid                                                                                                   | 0.19723  | -2.342   | 0.028575   | 1.544     |
| Clavam-2-carboxylate                                                                                                    | 0.20186  | -2.3085  | 0.022086   | 1.6559    |
| (1S,6S)-6-Aminooctahydro-1-indoliziny acetate                                                                           | 0.21514  | -2.2167  | 0.0062974  | 2.2008    |
| Rhodamine 6G                                                                                                            | 0.22321  | -2.1636  | 0.016971   | 1.7703    |
| THTA                                                                                                                    | 0.22822  | -2.1315  | 0.021597   | 1.6656    |
| 5-Butyloxazole                                                                                                          | 0.236    | -2.0831  | 0.04328    | 1.3637    |
| N-Acetyl-L-leucine                                                                                                      | 0.24101  | -2.0529  | 0.032579   | 1.4871    |
| Helicid                                                                                                                 | 0.24377  | -2.0364  | 0.023885   | 1.6219    |
| n-Amylbenzene                                                                                                           | 0.26717  | -1.9042  | 0.015652   | 1.8054    |
| Drotaverine                                                                                                             | 0.27506  | -1.8622  | 0.0061502  | 2.2111    |
| 2-Methyl-3-phenylpropyl hydrogen sulfate                                                                                | 0.29297  | -1.7712  | 0.018204   | 1.7398    |
| 2-Methyl-3-hydroxybutyric acid                                                                                          | 0.29373  | -1.7674  | 0.016305   | 1.7877    |
| 3-Sulfamoylalanine                                                                                                      | 0.31185  | -1.6811  | 0.021678   | 1.664     |
| RG5927903                                                                                                               | 0.31272  | -1.6771  | 0.022334   | 1.651     |
| DA6495000                                                                                                               | 0.31584  | -1.6627  | 0.016139   | 1.7921    |
| asn-lys                                                                                                                 | 0.32104  | -1.6392  | 0.021943   | 1.6587    |
| indospicine                                                                                                             | 0.32411  | -1.6255  | 0.027743   | 1.5569    |

|                                                                                                         |         |         |            |        |
|---------------------------------------------------------------------------------------------------------|---------|---------|------------|--------|
| 1-(sn-glycero-3-phospho)-1D-myo-inositol                                                                | 0.32962 | -1.6011 | 0.0048315  | 2.3159 |
| 3-Deoxy-D-manno-octulosonic acid                                                                        | 0.33263 | -1.588  | 0.025716   | 1.5898 |
| Methylimidazoleacetic acid                                                                              | 0.34119 | -1.5514 | 0.015784   | 1.8018 |
| 6-Acetamido-2-oxohexanoic acid                                                                          | 0.34364 | -1.541  | 0.035644   | 1.448  |
| Droxidopa                                                                                               | 0.35512 | -1.4936 | 0.027794   | 1.5561 |
| (2S)-2-Piperazinecarboxylic acid                                                                        | 0.35735 | -1.4846 | 0.041127   | 1.3859 |
| 2-Oxobutyric acid                                                                                       | 0.35892 | -1.4783 | 0.025763   | 1.589  |
| Glycine                                                                                                 | 0.36283 | -1.4626 | 0.016051   | 1.7945 |
| clavulanic acid                                                                                         | 0.37028 | -1.4333 | 0.027849   | 1.5552 |
| 1H-Imidazol-2-ol                                                                                        | 0.40679 | -1.2977 | 0.0010453  | 2.9808 |
| GLY-MET                                                                                                 | 0.41664 | -1.2631 | 0.034937   | 1.4567 |
| (S)-(+)-allantoin                                                                                       | 0.41891 | -1.2553 | 0.042623   | 1.3704 |
| methocarbamol                                                                                           | 0.42813 | -1.2239 | 0.0081159  | 2.0907 |
| Pimnidazole                                                                                             | 0.43457 | -1.2023 | 0.0077735  | 2.1094 |
| 3,4-Dehydroproline                                                                                      | 0.43781 | -1.1916 | 0.011137   | 1.9532 |
| 3-Oxotetradecanoic acid                                                                                 | 0.43803 | -1.1909 | 0.0010096  | 2.9959 |
| (S)-(+)-2-Amino-1-propanol                                                                              | 0.45124 | -1.148  | 0.032261   | 1.4913 |
| Propionylcarnitine                                                                                      | 0.45158 | -1.1469 | 0.0011722  | 2.931  |
| (1S,2R,5S)-2-Isopropyl-5-methylcyclohexyl 3-oxobutanoate                                                | 0.46424 | -1.107  | 0.00096884 | 3.0137 |
| 1-Methylhistidine                                                                                       | 0.47362 | -1.0782 | 0.0036394  | 2.439  |
| {[5-[(2S)-2-Carboxy-2-(trimethylammonio)ethyl]-1H-imidazol-2-yl]sulfanyl}oxidanide                      | 0.47626 | -1.0702 | 0.04364    | 1.3601 |
| 2-methylbutyrylcarnitine                                                                                | 0.4798  | -1.0595 | 0.032007   | 1.4948 |
| streptidine                                                                                             | 0.48833 | -1.0341 | 0.019481   | 1.7104 |
| [Similar to: 2-benzylideneindan-1-one; _Mass: 165.0170 Da]                                              | 0.49117 | -1.0257 | 0.038758   | 1.4116 |
| (3S)-3-(Pentanoyloxy)-4-(trimethylammonio)butanoate                                                     | 0.49545 | -1.0132 | 0.030221   | 1.5197 |
| (11Z)-eicoseneoylcarnitine                                                                              | 0.49803 | -1.0057 | 0.0033106  | 2.4801 |
| Traumatin                                                                                               | 0.49983 | -1.0005 | 0.033616   | 1.4735 |
| <b>Higher</b>                                                                                           |         |         |            |        |
| 4-styrylpyridine                                                                                        | 2.0216  | 1.0155  | 0.026322   | 1.5797 |
| _Estradiol-17_-glucuronide                                                                              | 2.0716  | 1.0508  | 0.04306    | 1.3659 |
| dacisteine                                                                                              | 2.2486  | 1.169   | 0.026331   | 1.5795 |
| (5S,9R)-12-[(2R)-6-Hydroxy-2,5,7,8-tetramethyl-3,4-dihydro-2H-chromen-2-yl]-5,9-dimethyldodecanoic acid | 2.2495  | 1.1696  | 0.026592   | 1.5752 |
| (+)-ar-Turmerone                                                                                        | 2.2648  | 1.1794  | 0.016288   | 1.7881 |
| 5(6)-EET Ethanolamide                                                                                   | 2.3496  | 1.2324  | 0.011287   | 1.9474 |
| 4-amino-2-hydroxyamino-6-nitrotoluene                                                                   | 2.362   | 1.24    | 0.015436   | 1.8115 |
| (2S,3S)-2,3-dihydro-3-hydroxyanthranilic acid zwitterion                                                | 2.4954  | 1.3193  | 0.01854    | 1.7319 |
| RPI-1                                                                                                   | 2.9104  | 1.5412  | 0.039482   | 1.4036 |
| Crotanecine                                                                                             | 2.9162  | 1.5441  | 0.02966    | 1.5278 |

|                                                                                                             |        |        |            |        |
|-------------------------------------------------------------------------------------------------------------|--------|--------|------------|--------|
| N-(Carboxymethyl)norleucine                                                                                 | 3.0728 | 1.6195 | 0.037301   | 1.4283 |
| (2E)-3-Cyano-2-methyl-2-propen-1-yl stearate                                                                | 3.0751 | 1.6206 | 0.0053356  | 2.2728 |
| Elatine                                                                                                     | 3.2617 | 1.7056 | 0.015596   | 1.807  |
| 3-(2,6-dichlorophenyl)-N-(1,4-dioxo-7lambda~4~-thiaspiro[4.4]non-7-ylidene)-5-methylisoxazole-4-carboxamide | 3.3563 | 1.7469 | 0.037211   | 1.4293 |
| Linamarin                                                                                                   | 3.3653 | 1.7507 | 0.011556   | 1.9372 |
| apronalide                                                                                                  | 3.5349 | 1.8217 | 0.0032245  | 2.4915 |
| 1-palmitoyl-2-oleoyl-sn-glycero-3-phosphoethanolamine                                                       | 3.7794 | 1.9182 | 0.026769   | 1.5724 |
| 2-Aminooctanedioic acid                                                                                     | 4.3141 | 2.1091 | 0.029085   | 1.5363 |
| NP-020082                                                                                                   | 4.4218 | 2.1446 | 0.0015004  | 2.8238 |
| ascr#29                                                                                                     | 4.887  | 2.289  | 0.0023789  | 2.6236 |
| Xylenesulfonate                                                                                             | 5.1788 | 2.3726 | 0.0073677  | 2.1327 |
| 1-myristoyl-2-palmitoleoyl-sn-glycero-3-phosphocholine                                                      | 5.2837 | 2.4016 | 0.0036859  | 2.4335 |
| 5,6_-DIHYDRO PGI2                                                                                           | 5.3633 | 2.4231 | 0.00045781 | 3.3393 |
| 6-{{2-(2-oxo-1-imidazolidinyl)ethyl}amino}-2-pyridinecarbonitrile                                           | 5.7456 | 2.5225 | 0.011824   | 1.9272 |
| [Similar to: Victoria Pure Blue BO; _Mass: -222.1271 Da]                                                    | 6.148  | 2.6201 | 0.0012249  | 2.9119 |
| (4Z,16E,29E,31R)-15,31-Dihydroxy-4,16,29-tritriacontatriene-2,32-diyonic acid                               | 6.2361 | 2.6406 | 0.0021701  | 2.6635 |
| sphinganine-1-phosphocholine                                                                                | 6.2859 | 2.6521 | 0.00069728 | 3.1566 |
| Taurochenodeoxycholic acid                                                                                  | 7.0436 | 2.8163 | 0.021184   | 1.674  |
| (S)-N-Boc-L-homoserine ethyl ester                                                                          | 9.6626 | 3.2724 | 0.00017725 | 3.7514 |
| 7-Methyl-6-thioguanosine                                                                                    | 12.116 | 3.5989 | 0.0014088  | 2.8511 |

**Table S1.** Untargeted metabolomics analysis in colon tissue of mice exposed to polystyrene (2mg/week);  $p = 0.05$ . Data can be found in supplemental Excel Table S1.

**Table S2.**

| <b>Untargeted Metabolomic Analysis in<br/>Colon Tissue of Mice Exposed to<br/>Polystyrene (4mg/week) p = 0.05</b>       | <b>FC</b> | <b>log2(FC)</b> | <b>raw.pval</b> | <b>-LOG10(p)</b> |
|-------------------------------------------------------------------------------------------------------------------------|-----------|-----------------|-----------------|------------------|
| <b>Lower</b>                                                                                                            |           |                 |                 |                  |
| hexahydro-2-oxo-1h-thieno(3,4-d)imidazole-4-pentanoic acid                                                              | 0.049435  | -4.3383         | 0.00042841      | 3.3681           |
| Homocarnosine                                                                                                           | 0.056165  | -4.1542         | 0.0052136       | 2.2829           |
| 4-Hydroxy-4-(methylnitrosoamino)-1-(3-pyridinyl)-1-butanone                                                             | 0.084394  | -3.5667         | 0.0026376       | 2.5788           |
| 2-[(7-methyl-2,3-dihydro-1H-inden-4-yl)oxy]pyridin-3-amine                                                              | 0.084394  | -3.5667         | 0.0026376       | 2.5788           |
| Zalcitabine                                                                                                             | 0.092094  | -3.4408         | 0.0045502       | 2.342            |
| 2-Mercapto-3-methylbutan-1-ol                                                                                           | 0.10784   | -3.213          | 0.009004        | 2.0456           |
| Carnosine                                                                                                               | 0.12284   | -3.0252         | 0.0016398       | 2.7852           |
| n-Hexanamide                                                                                                            | 0.12298   | -3.0235         | 0.0111          | 1.9547           |
| EIPA                                                                                                                    | 0.14092   | -2.827          | 0.0085784       | 2.0666           |
| N-[(1S,3aS,5S,7aR)-7a-{3-[(2-Furylmethyl)amino]-3-oxopropyl}-5-hydroxy-3,3,5-trimethyloctahydro-1H-inden-1-yl]benzamide | 0.1762    | -2.5047         | 0.018036        | 1.7438           |
| [Similar to: 4-Dodecylbenzenesulfonic acid; _Mass: -0.0364 Da]                                                          | 0.2017    | -2.3097         | 0.038908        | 1.41             |
| Perindopril                                                                                                             | 0.2148    | -2.2189         | 0.044594        | 1.3507           |
| Clavam-2-carboxylate                                                                                                    | 0.23916   | -2.0639         | 0.04329         | 1.3636           |
| 3-Hydroxysebacic acid                                                                                                   | 0.25386   | -1.9779         | 0.019882        | 1.7015           |
| 2-Methyl-3-phenylpropyl hydrogen sulfate                                                                                | 0.29621   | -1.7553         | 0.029485        | 1.5304           |
| THTA                                                                                                                    | 0.31297   | -1.6759         | 0.039298        | 1.4056           |
| 1-(sn-glycero-3-phospho)-1D-myo-inositol                                                                                | 0.33887   | -1.5612         | 0.0092024       | 2.0361           |
| (1S,6S)-6-Aminoctahydro-1-indoliziny acetate                                                                            | 0.34988   | -1.5151         | 0.046031        | 1.3369           |
| bilirubin                                                                                                               | 0.39365   | -1.345          | 0.028964        | 1.5381           |
| 9-Hexadecenoylcarnitine                                                                                                 | 0.40177   | -1.3156         | 0.03599         | 1.4438           |
| DA6495000                                                                                                               | 0.43482   | -1.2015         | 0.04883         | 1.3113           |
| 1-Oleoyl-rac-glycerol                                                                                                   | 0.45994   | -1.1205         | 0.03186         | 1.4968           |
| Secnidazole                                                                                                             | 0.47635   | -1.0699         | 0.032104        | 1.4934           |
| <b>Higher</b>                                                                                                           |           |                 |                 |                  |
| 3-[(5Z)-5-Dodecenoyloxy]dodecanoic acid                                                                                 | 2.0057    | 1.0041          | 0.041034        | 1.3869           |
| 3-(2,6-Dioxocyclohexyl)propanenitrile                                                                                   | 2.0715    | 1.0507          | 0.03503         | 1.4556           |
| N-Acetyl-L-phenylalanine                                                                                                | 2.1389    | 1.0968          | 0.049383        | 1.3064           |
| Mersalyl                                                                                                                | 2.1455    | 1.1013          | 0.018103        | 1.7422           |

|                                                                                                                           |        |        |           |        |
|---------------------------------------------------------------------------------------------------------------------------|--------|--------|-----------|--------|
| [Similar to: L-Glutathione oxidized;<br>_Mass: -225.0480 Da]                                                              | 2.1716 | 1.1187 | 0.023221  | 1.6341 |
| Amplex red                                                                                                                | 2.2387 | 1.1627 | 0.020239  | 1.6938 |
| NSC 693868                                                                                                                | 2.2571 | 1.1745 | 0.038119  | 1.4189 |
| Orotic acid                                                                                                               | 2.2632 | 1.1783 | 0.036991  | 1.4319 |
| N-(Carboxymethyl)norleucine                                                                                               | 2.2767 | 1.187  | 0.013437  | 1.8717 |
| Crotanecine                                                                                                               | 2.3224 | 1.2156 | 0.0062499 | 2.2041 |
| paeonilactone A                                                                                                           | 2.4339 | 1.2833 | 0.0075062 | 2.1246 |
| Bromfenac                                                                                                                 | 2.4694 | 1.3042 | 0.02167   | 1.6641 |
| Primobolan                                                                                                                | 2.5069 | 1.3259 | 0.011789  | 1.9285 |
| L-(+)-Aspartic acid                                                                                                       | 2.5222 | 1.3347 | 0.041542  | 1.3815 |
| 8-amino-2,6-anhydro-3,8-dideoxy-D-glycero-D-talo-octonic acid                                                             | 2.5301 | 1.3392 | 0.023749  | 1.6244 |
| Haplopine                                                                                                                 | 2.5841 | 1.3696 | 0.01561   | 1.8066 |
| N-Nitrosodiethylamine                                                                                                     | 2.64   | 1.4005 | 0.049468  | 1.3057 |
| (2E)-N-[(3S)-2-Oxotetrahydro-3-furanyl]-2-dodecenamide                                                                    | 2.7089 | 1.4377 | 0.024827  | 1.6051 |
| NSC 1775                                                                                                                  | 2.7112 | 1.4389 | 0.033715  | 1.4722 |
| Ethyl-_-D-glucuronide                                                                                                     | 2.7143 | 1.4406 | 0.019145  | 1.718  |
| MFCD00210904                                                                                                              | 2.7262 | 1.4469 | 0.032908  | 1.4827 |
| temurtide                                                                                                                 | 2.7954 | 1.4831 | 0.022015  | 1.6573 |
| O-Acetyl-L-serine                                                                                                         | 2.8016 | 1.4862 | 0.0069346 | 2.159  |
| Pilocarpine                                                                                                               | 2.8142 | 1.4927 | 0.01615   | 1.7918 |
| L-Glutamyl-L-Isoleucine                                                                                                   | 2.8278 | 1.4997 | 0.033939  | 1.4693 |
| 3-O-Methyl-N-acetyl-D-glucosamine                                                                                         | 2.9215 | 1.5467 | 0.016568  | 1.7807 |
| N-acetyldopamine                                                                                                          | 2.9607 | 1.5659 | 0.0026717 | 2.5732 |
| Methyl (2R,3S)-3-hydroxy-8-methyl-8-azabicyclo[3.2.1]octane-2-carboxylate                                                 | 3.0364 | 1.6024 | 0.045296  | 1.3439 |
| 4-amino-2-hydroxyamino-6-nitrotoluene                                                                                     | 3.1258 | 1.6442 | 0.01252   | 1.9024 |
| [Similar to: 2-benzylideneindan-1-one;<br>_Mass: -7.9452 Da]                                                              | 3.1531 | 1.6567 | 0.048809  | 1.3115 |
| (5S,9R)-12-[(2R)-6-Hydroxy-2,5,7,8-tetramethyl-3,4-dihydro-2H-chromen-2-yl]-5,9-dimethyldodecanoic acid                   | 3.1804 | 1.6692 | 0.0086491 | 2.063  |
| CAY10665                                                                                                                  | 3.1935 | 1.6751 | 0.026167  | 1.5822 |
| DiQ                                                                                                                       | 3.2208 | 1.6874 | 0.028777  | 1.541  |
| 2-[[[(3alpha,5beta,7alpha,8xi,12alpha)-3,7,12-Trihydroxy-24-oxocholan-24-yl]amino]ethyl hydrogen sulfate                  | 3.3671 | 1.7515 | 0.0030144 | 2.5208 |
| 5-hydroxy-2,2,6,6-tetramethyl-4-{2-methyl-1-[2,4,6-trihydroxy-3-(2-methylpropanoyl)phenyl]propyl}cyclohex-4-ene-1,3-dione | 3.5746 | 1.8378 | 0.045454  | 1.3424 |
| trachelanthamidine                                                                                                        | 3.6633 | 1.8732 | 0.04212   | 1.3755 |
| [Similar to: Taurodeoxycholic Acid (sodium salt); _Mass: -143.1652 Da]                                                    | 3.6929 | 1.8848 | 0.046931  | 1.3285 |



|                                                                           |        |        |           |        |
|---------------------------------------------------------------------------|--------|--------|-----------|--------|
| _Estradiol-17_glucuronide                                                 | 3.8107 | 1.9301 | 0.0022023 | 2.6571 |
| 1-(4,6-Dimethoxy-1,3,5-triazin-2-yl)-8-methyl-1,2,3,4-tetrahydroquinoline | 3.8631 | 1.9498 | 0.011186  | 1.9513 |
| 2-Aminooctanedioic acid                                                   | 3.8863 | 1.9584 | 0.0090249 | 2.0446 |
| N-5-Carboxypentyl-1-deoxynojirimycin                                      | 3.8899 | 1.9597 | 0.031626  | 1.5    |
| NP-020082                                                                 | 4.3924 | 2.135  | 0.0066857 | 2.1749 |
| beta-D-Ethyl glucuronide                                                  | 4.8058 | 2.2648 | 0.014142  | 1.8495 |
| Kojic acid                                                                | 5.2644 | 2.3963 | 0.017637  | 1.7536 |
| apronalide                                                                | 5.4245 | 2.4395 | 0.018961  | 1.7221 |
| (S)-N-Boc-L-homoserine ethyl ester                                        | 7.5054 | 2.9079 | 0.04455   | 1.3511 |
| Pro-Lys                                                                   | 11.209 | 3.4866 | 0.03164   | 1.4998 |
| Methionine sulfone                                                        | 14.131 | 3.8208 | 0.026265  | 1.5806 |
| 7-Methyl-6-thioguanosine                                                  | 17.119 | 4.0976 | 0.01952   | 1.7095 |
| N-Acetylorithine                                                          | 18.792 | 4.232  | 0.025229  | 1.5981 |

**Table S2.** Untargeted metabolomic analysis in colon tissue of mice exposed to polystyrene (4mg/week);  $p = 0.05$ . Data can be found in supplemental Excel Table S2.

**Table S3.**

| <b>Untargeted Metabolomic Analysis in Colon Tissue of Mice Exposed to Mixed Polymer (2mg/week) p = 0.05</b>                                                                                                   | <b>FC</b> | <b>log2(FC)</b> | <b>raw.pval</b> | <b>-LOG10(p)</b> |
|---------------------------------------------------------------------------------------------------------------------------------------------------------------------------------------------------------------|-----------|-----------------|-----------------|------------------|
| <b>Lower</b>                                                                                                                                                                                                  |           |                 |                 |                  |
| S-Lactoylglutathione                                                                                                                                                                                          | 0.1429    | -2.8069         | 0.0024224       | 2.6157           |
| 3-(Sulfooxy)butanoic acid                                                                                                                                                                                     | 0.20343   | -2.2974         | 0.021779        | 1.662            |
| [Similar to: 2-benzylideneindan-1-one; _Mass: 1.0375 Da]                                                                                                                                                      | 0.22513   | -2.1512         | 0.0056007       | 2.2518           |
| 5'-O-<br>{Hydroxy[(hydroxy{[hydroxy(phosphonoxy)phosphoryl]oxy}phosphoryl)oxy]phosphoryl]inosine                                                                                                              | 0.22567   | -2.1477         | 0.046502        | 1.3325           |
| 2212914                                                                                                                                                                                                       | 0.22657   | -2.142          | 0.036318        | 1.4399           |
| Oxalosuccinic acid                                                                                                                                                                                            | 0.28708   | -1.8005         | 0.015077        | 1.8217           |
| HC red 3                                                                                                                                                                                                      | 0.29058   | -1.783          | 0.021922        | 1.6591           |
| (1E)-1,7-bis(4-hydroxyphenyl)hept-1-en-3-one                                                                                                                                                                  | 0.3168    | -1.6584         | 0.04937         | 1.3065           |
| 6-Isopropylidene-4,4a-dimethyl-7-oxodecahydro-2-naphthalenyl (2E)-3-(methylsulfonyl)acrylate                                                                                                                  | 0.32579   | -1.618          | 0.019881        | 1.7016           |
| (1E)-4-(2-Thienyl)-1-buten-3-yn-1-ol                                                                                                                                                                          | 0.34259   | -1.5454         | 0.049858        | 1.3023           |
| (3Z)-4-(4-Methyl-1-piperaziny)-3-(2-oxopropylidene)-1,3-dihydro-2H-1,5-benzodiazepin-2-one                                                                                                                    | 0.34401   | -1.5395         | 0.027304        | 1.5638           |
| butachlor [ANSI, JMAF, WSSA]                                                                                                                                                                                  | 0.36245   | -1.4641         | 0.027591        | 1.5592           |
| L-Alanyl-L-glutamine                                                                                                                                                                                          | 0.3673    | -1.445          | 0.0043174       | 2.3648           |
| S-methylglutathione                                                                                                                                                                                           | 0.36861   | -1.4398         | 0.01591         | 1.7983           |
| [Similar to: (-)-Spiculisporic acid; _Mass: -0.0178 Da]                                                                                                                                                       | 0.37036   | -1.433          | 0.027159        | 1.5661           |
| NP-001346                                                                                                                                                                                                     | 0.37069   | -1.4317         | 0.0028182       | 2.55             |
| [Similar to: ethyl 5-[(2,3-dihydro-1-benzofuran-5-ylsulfonyl)amino]-2-piperidinobenzoate; _Mass: -246.1395 Da]                                                                                                | 0.37665   | -1.4087         | 0.030737        | 1.5123           |
| (4S,8S)-1-{1-[2-Amino-1-hydroxy-3-(4-hydroxycyclohexyl)propoxy]-2-pyrrolidiny]-4-[(2S)-2-butanyl]-12-(dihydroxymethyl)-1-hydroxy-8-(hydroxymethyl)-14-methyl-2,6,10-trioxo-3,7,11-triazapentadecane-5,9-dione | 0.38294   | -1.3848         | 0.017555        | 1.7556           |

|                                                                                                |         |         |           |        |
|------------------------------------------------------------------------------------------------|---------|---------|-----------|--------|
| [Similar to: 4-Dodecylbenzenesulfonic acid; _Mass: -0.0364 Da]                                 | 0.39178 | -1.3519 | 0.022669  | 1.6446 |
| 1-Methyl-3,4-dihydro-6,7-isoquinolinediol                                                      | 0.39187 | -1.3515 | 0.0017522 | 2.7564 |
| Metirosine                                                                                     | 0.39391 | -1.344  | 0.0019402 | 2.7121 |
| S-Adenosylhomocysteine                                                                         | 0.39416 | -1.3431 | 0.01445   | 1.8401 |
| L-(-)-Methionine                                                                               | 0.40108 | -1.318  | 0.035537  | 1.4493 |
| Piperonyl sulfoxide                                                                            | 0.40282 | -1.3118 | 0.035105  | 1.4546 |
| L-Ergothioneine                                                                                | 0.41036 | -1.285  | 0.034252  | 1.4653 |
| 5-Aminoisotonitazene                                                                           | 0.41191 | -1.2796 | 0.02871   | 1.542  |
| Tauropine                                                                                      | 0.4125  | -1.2775 | 0.010177  | 1.9924 |
| 2,4-Diaminotoluene                                                                             | 0.41341 | -1.2744 | 0.025037  | 1.6014 |
| Hypotaurine                                                                                    | 0.42282 | -1.2419 | 0.039494  | 1.4035 |
| Paraldehyde                                                                                    | 0.42956 | -1.2191 | 0.026548  | 1.576  |
| 2-Methylthiazolidine                                                                           | 0.445   | -1.1681 | 0.041315  | 1.3839 |
| 3-Methylsulfolene                                                                              | 0.44668 | -1.1627 | 0.041007  | 1.3871 |
| Methyl alpha-aspartylphenylalaninate                                                           | 0.45525 | -1.1353 | 0.013023  | 1.8853 |
| dacisteine                                                                                     | 0.45634 | -1.1318 | 0.017736  | 1.7512 |
| Secnidazole                                                                                    | 0.46077 | -1.1179 | 0.017444  | 1.7584 |
| Linoleyl carnitine                                                                             | 0.47302 | -1.08   | 0.0016362 | 2.7862 |
| Guanine                                                                                        | 0.47969 | -1.0598 | 0.021185  | 1.674  |
| CYCLO(L-LEU-L-PRO)                                                                             | 0.48302 | -1.0498 | 0.019845  | 1.7023 |
| Gonan-3-yl hydrogen sulfate                                                                    | 0.48653 | -1.0394 | 0.047946  | 1.3193 |
| Pivagabine                                                                                     | 0.49189 | -1.0236 | 0.017515  | 1.7566 |
| asp-gln                                                                                        | 0.49382 | -1.0179 | 0.01277   | 1.8938 |
| Ostruthin                                                                                      | 0.49512 | -1.0142 | 0.037659  | 1.4241 |
| <b>Higher</b>                                                                                  |         |         |           |        |
| N-Sulfanyl-L-asparagine                                                                        | 2.0003  | 1.0002  | 0.035408  | 1.4509 |
| Nigrifactin                                                                                    | 2.0272  | 1.0195  | 0.010057  | 1.9975 |
| methylguanidine                                                                                | 2.0449  | 1.032   | 0.0045048 | 2.3463 |
| C8-HSL                                                                                         | 2.0557  | 1.0396  | 0.017832  | 1.7488 |
| SA1850000                                                                                      | 2.059   | 1.0419  | 0.038616  | 1.4132 |
| VQH                                                                                            | 2.0627  | 1.0446  | 0.03323   | 1.4785 |
| N8-Acetylspermidine                                                                            | 2.071   | 1.0503  | 0.025357  | 1.5959 |
| toluidine                                                                                      | 2.0721  | 1.0511  | 0.028607  | 1.5435 |
| 3-hydroxy-3-methyloxindole                                                                     | 2.0752  | 1.0532  | 0.013712  | 1.8629 |
| 8-Hydroxyquinoline                                                                             | 2.0765  | 1.0542  | 0.013871  | 1.8579 |
| 6-Thio-dG                                                                                      | 2.0832  | 1.0588  | 0.0072956 | 2.1369 |
| _Alanine                                                                                       | 2.098   | 1.069   | 0.047795  | 1.3206 |
| 19(R)-hydroxy Prostaglandin F1?                                                                | 2.1063  | 1.0747  | 0.019671  | 1.7062 |
| 4-(Hydroxymethyl)benzenesulfonic acid                                                          | 2.1114  | 1.0782  | 0.033353  | 1.4769 |
| Methanesulfonic acid                                                                           | 2.1277  | 1.0893  | 0.01341   | 1.8726 |
| Crotonic acid                                                                                  | 2.1288  | 1.09    | 0.031703  | 1.4989 |
| (9Z,11E)-13-[(4Z,7Z,10Z,16Z,19Z)-4,7,10,13,16,19-Docosahexaenoyloxy]-9,11-octadecadienoic acid | 2.1351  | 1.0943  | 0.049103  | 1.3089 |

|                                                                                |        |        |           |        |
|--------------------------------------------------------------------------------|--------|--------|-----------|--------|
| Ferulic acid 4-sulfate                                                         | 2.1358 | 1.0947 | 0.034046  | 1.4679 |
| Tridemorph                                                                     | 2.198  | 1.1362 | 0.025728  | 1.5896 |
| Gentioflavine                                                                  | 2.2382 | 1.1623 | 0.014198  | 1.8478 |
| m-carboxyaniline                                                               | 2.2623 | 1.1778 | 2.54E-05  | 4.5959 |
| 6-Oxohexanoic acid                                                             | 2.2823 | 1.1905 | 0.034902  | 1.4572 |
| 2-Hexenoylcarnitine                                                            | 2.2995 | 1.2013 | 0.045521  | 1.3418 |
| 2,4,5-trimethoxyamphetamine                                                    | 2.3057 | 1.2052 | 0.032819  | 1.4839 |
| (2E)-3-Methyl-4-(sulfooxy)-2-butenic acid                                      | 2.3259 | 1.2178 | 0.036834  | 1.4337 |
| 1-Isothiocyanato-7-(methylthio)heptane                                         | 2.3354 | 1.2237 | 0.032892  | 1.4829 |
| Isobutyric acid                                                                | 2.4441 | 1.2893 | 0.0044778 | 2.3489 |
| 3-Buten-1-amine                                                                | 2.4741 | 1.3069 | 0.001662  | 2.7794 |
| Ethyl sulfate                                                                  | 2.5166 | 1.3315 | 0.028943  | 1.5385 |
| Imidazoleacetic acid                                                           | 2.5239 | 1.3356 | 0.037908  | 1.4213 |
| (2S,3R)-N-(1-Hydroxy-2-propanyl)-2-methyl-3-pentadecyl-2-oxiranecarboxamide    | 2.5244 | 1.336  | 0.033877  | 1.4701 |
| ODA                                                                            | 2.5338 | 1.3413 | 0.0071442 | 2.146  |
| Anthranil                                                                      | 2.554  | 1.3527 | 6.21E-05  | 4.2071 |
| acetyltaurine                                                                  | 2.5557 | 1.3537 | 0.010096  | 1.9958 |
| (S)-(+)-allantoin                                                              | 2.585  | 1.3702 | 0.02084   | 1.6811 |
| Glycerone sulfate                                                              | 2.5884 | 1.3721 | 0.0045225 | 2.3446 |
| D-(+)-Xylose                                                                   | 2.6144 | 1.3865 | 0.0087848 | 2.0563 |
| 5-Butyloxazole                                                                 | 2.6351 | 1.3979 | 0.028359  | 1.5473 |
| 3-Indoxyl sulphate                                                             | 2.6489 | 1.4054 | 0.01339   | 1.8732 |
| Isoleucyl-4-hydroxyproline                                                     | 2.686  | 1.4255 | 0.022949  | 1.6392 |
| Sulfosalicylic Acid                                                            | 2.7033 | 1.4347 | 0.0093032 | 2.0314 |
| 1-(2-Isopropylidenehydrazino)phthalazine                                       | 2.7313 | 1.4496 | 0.008294  | 2.0812 |
| Dihydrouridine                                                                 | 2.8044 | 1.4877 | 0.013377  | 1.8736 |
| AL9450000                                                                      | 2.8046 | 1.4878 | 0.023263  | 1.6333 |
| D-Glucono-delta-lactone                                                        | 2.907  | 1.5395 | 0.003871  | 2.4122 |
| 1,5-Isoquinolinediol                                                           | 2.9189 | 1.5454 | 0.0015942 | 2.7975 |
| 2-Hydroxyethylclavam                                                           | 2.9277 | 1.5498 | 0.015151  | 1.8196 |
| (E)-2-Butenyl-4-methyl-threonine                                               | 2.9331 | 1.5524 | 0.04363   | 1.3602 |
| 4-Guanidinobutyric acid                                                        | 2.9707 | 1.5708 | 0.008271  | 2.0824 |
| Glycine                                                                        | 2.9774 | 1.5741 | 0.0056801 | 2.2456 |
| fagaramide                                                                     | 2.9879 | 1.5791 | 0.042154  | 1.3752 |
| 4-ethylphenylsulfonic acid                                                     | 2.9993 | 1.5846 | 0.041696  | 1.3799 |
| 4-Ethyl-2-hydroxy-6-methoxyphenyl hydrogen sulfate                             | 2.9993 | 1.5846 | 0.041696  | 1.3799 |
| [Similar to: 2-[(1H-1,2,4-triazol-3-ylimino)methyl]phenol; _Mass: -94.0626 Da] | 2.9993 | 1.5846 | 0.041696  | 1.3799 |
| 3-Hydroxy-N-[(3S)-2-oxotetrahydro-3-furanyl]octanamide                         | 3.0091 | 1.5893 | 0.014615  | 1.8352 |

|                                                                                                                                                 |        |        |            |        |
|-------------------------------------------------------------------------------------------------------------------------------------------------|--------|--------|------------|--------|
| Vanillic acid 4-sulfate                                                                                                                         | 3.0258 | 1.5973 | 0.013024   | 1.8853 |
| 5-Aminovaleric acid                                                                                                                             | 3.0615 | 1.6142 | 0.0098773  | 2.0054 |
| 3-Ureidopropionic acid                                                                                                                          | 3.0744 | 1.6203 | 0.040765   | 1.3897 |
| 1-Methylimidazoleacetic acid                                                                                                                    | 3.0925 | 1.6288 | 0.019158   | 1.7177 |
| Terephthalic acid                                                                                                                               | 3.1128 | 1.6382 | 0.022626   | 1.6454 |
| 4-cyclopropyl-6-methoxy-1,3,5-triazin-2-amine                                                                                                   | 3.1322 | 1.6472 | 0.0063034  | 2.2004 |
| Trigonelline                                                                                                                                    | 3.1459 | 1.6535 | 0.00287    | 2.5421 |
| PD 161570                                                                                                                                       | 3.1526 | 1.6565 | 0.0043092  | 2.3656 |
| Gly-Lys                                                                                                                                         | 3.2074 | 1.6814 | 0.036549   | 1.4371 |
| 5-Hydantoinpropionic acid                                                                                                                       | 3.2105 | 1.6828 | 0.03934    | 1.4052 |
| (5Z)-2-Amino-4,5-dihydroxy-5-(((1E)-2-(hydroxymethyl)-1,3-butadien-1-yl)imino)pentanoic acid (non-preferred name)                               | 3.2471 | 1.6991 | 0.040655   | 1.3909 |
| 5-Formyl-2-furoic acid                                                                                                                          | 3.3044 | 1.7244 | 0.02717    | 1.5659 |
| Cetrimonium                                                                                                                                     | 3.346  | 1.7425 | 0.047746   | 1.3211 |
| 2-Chloro-N-((2S,3R,4E)-1,3-dihydroxy-4-octadecen-2-yl)acetamide                                                                                 | 3.4744 | 1.7968 | 0.00040168 | 3.3961 |
| XJ6642800                                                                                                                                       | 3.5055 | 1.8096 | 0.013131   | 1.8817 |
| N-Boc-L-proline                                                                                                                                 | 3.5079 | 1.8106 | 0.017005   | 1.7694 |
| 2,4-Dihydroxybenzoic acid                                                                                                                       | 3.512  | 1.8123 | 0.0082057  | 2.0859 |
| Formylisoglutamine                                                                                                                              | 3.5217 | 1.8163 | 0.010361   | 1.9846 |
| G-Lactone                                                                                                                                       | 3.5272 | 1.8185 | 2.90E-05   | 4.5382 |
| MMDPPO                                                                                                                                          | 3.5454 | 1.826  | 0.0061883  | 2.2084 |
| 5-Nitro-o-toluidine                                                                                                                             | 3.5587 | 1.8314 | 0.012697   | 1.8963 |
| 4-Hydroxy-3-methoxyphenylglycol sulfate                                                                                                         | 3.5942 | 1.8457 | 0.036239   | 1.4408 |
| N-Acetylcitrulline                                                                                                                              | 3.6691 | 1.8754 | 0.013102   | 1.8827 |
| 4-Phenolsulfonic acid                                                                                                                           | 3.6912 | 1.8841 | 0.015513   | 1.8093 |
| N5-(1-Iminoethyl)-L-ornithine                                                                                                                   | 3.6966 | 1.8862 | 0.047833   | 1.3203 |
| g-Guanidinobutyrate                                                                                                                             | 3.6982 | 1.8868 | 0.0047823  | 2.3204 |
| 3-(Sulfooxy)benzenepropanoic acid                                                                                                               | 3.7081 | 1.8907 | 0.027015   | 1.5684 |
| 4-Acetamidobenzoic acid                                                                                                                         | 3.7306 | 1.8994 | 0.02385    | 1.6225 |
| Acetanilide                                                                                                                                     | 3.7471 | 1.9058 | 0.0066814  | 2.1751 |
| 2-oxo-8-methylthiooctanoic acid                                                                                                                 | 3.7616 | 1.9114 | 0.0033344  | 2.477  |
| Indole-3-carboxylic acid-O-sulphate                                                                                                             | 3.763  | 1.9119 | 0.01336    | 1.8742 |
| N-Acetylornithine                                                                                                                               | 3.8043 | 1.9276 | 0.041164   | 1.3855 |
| 3-hydroxy-2-methylbutyric acid                                                                                                                  | 3.8638 | 1.95   | 0.015985   | 1.7963 |
| [Similar to: N-(((1S,3R,4R,5S)-1,3,4-trihydroxy-5-(((phenylsulfonyl)acetyl)amino)cyclohexyl)carbonyl)-D-phenylalaninamide; _Mass: -354.1024 Da] | 3.8653 | 1.9506 | 0.038353   | 1.4162 |
| Benzenol                                                                                                                                        | 3.8706 | 1.9526 | 0.037393   | 1.4272 |
| 4-ACETAMIDOBUTYRIC ACID                                                                                                                         | 3.91   | 1.9672 | 0.0055212  | 2.258  |

|                                                                                                                                  |        |        |            |        |
|----------------------------------------------------------------------------------------------------------------------------------|--------|--------|------------|--------|
| 3,4-Dihydroxybenzenesulfonic acid                                                                                                | 4.0908 | 2.0324 | 0.0041192  | 2.3852 |
| ecgonone methyl ester                                                                                                            | 4.0924 | 2.0329 | 0.027835   | 1.5554 |
| 4-hydroxy Alternariol                                                                                                            | 4.1218 | 2.0433 | 0.0058224  | 2.2349 |
| 3-[4-(Sulfooxy)phenyl]acrylic acid                                                                                               | 4.1746 | 2.0616 | 0.0059179  | 2.2278 |
| Aceglutamide                                                                                                                     | 4.2395 | 2.0839 | 0.0018623  | 2.7299 |
| Methylhippuric acid                                                                                                              | 4.2818 | 2.0982 | 0.0011355  | 2.9448 |
| Benalfocin                                                                                                                       | 4.306  | 2.1063 | 0.0087295  | 2.059  |
| Resorcinol                                                                                                                       | 4.3205 | 2.1112 | 0.0078657  | 2.1043 |
| 4-Hydroxy-3-(sulfooxy)benzoic acid                                                                                               | 4.4117 | 2.1413 | 0.0097759  | 2.0098 |
| Hippuric acid                                                                                                                    | 4.5592 | 2.1888 | 0.011043   | 1.9569 |
| CAY10662                                                                                                                         | 4.5924 | 2.1992 | 0.0027891  | 2.5545 |
| doxapram                                                                                                                         | 4.5986 | 2.2012 | 0.0027895  | 2.5545 |
| 4-(2-Hydroxyethyl)phenyl hydrogen sulfate                                                                                        | 4.6036 | 2.2027 | 0.017526   | 1.7563 |
| n-Hexanamide                                                                                                                     | 4.6303 | 2.2111 | 0.034965   | 1.4564 |
| Benzoic acid                                                                                                                     | 4.635  | 2.2126 | 0.010647   | 1.9728 |
| Zalcitabine                                                                                                                      | 4.6667 | 2.2224 | 0.0066634  | 2.1763 |
| alpha-Methyl D-mannoside                                                                                                         | 4.6672 | 2.2225 | 0.0086589  | 2.0625 |
| 5-sulfooxymethylfurfural                                                                                                         | 4.6742 | 2.2247 | 0.0031477  | 2.502  |
| Arachidonoyl serotonin                                                                                                           | 4.734  | 2.2431 | 0.012233   | 1.9125 |
| Oleana-12,21-dien-3-ol                                                                                                           | 4.7366 | 2.2439 | 0.012384   | 1.9071 |
| APR-246                                                                                                                          | 4.7518 | 2.2485 | 0.014671   | 1.8335 |
| PRIMA-1                                                                                                                          | 4.8081 | 2.2655 | 0.0043908  | 2.3575 |
| 1228222                                                                                                                          | 4.8357 | 2.2737 | 0.0036848  | 2.4336 |
| propionylcarnitine                                                                                                               | 4.8444 | 2.2763 | 0.013187   | 1.8798 |
| MST-312                                                                                                                          | 4.9233 | 2.2996 | 0.010235   | 1.9899 |
| 4-Acetamidobutanoic acid                                                                                                         | 4.9282 | 2.3011 | 0.00066374 | 3.178  |
| (1'R,2'S,3S,5'S,6'S,8'R,11'S)-4'-Methyl-2'-vinylspiro[indole-3,7'-[9]oxa[4]azatetracyclo[6.3.1.0~2,6~.0~5,11~]dodecan]-2(1H)-one | 5.0991 | 2.3502 | 0.0034563  | 2.4614 |
| N-Acetyl-Trp-OH                                                                                                                  | 5.1417 | 2.3623 | 0.0049573  | 2.3048 |
| Benzyl 2-oxohexahydrocyclopropa[d]imidazole-1-carboxylate                                                                        | 5.1557 | 2.3662 | 0.0030753  | 2.5121 |
| N-(3-acetamidopropyl)pyrrolidin-2-one                                                                                            | 5.2809 | 2.4008 | 0.036782   | 1.4344 |
| guaiacol sulfate                                                                                                                 | 5.443  | 2.4444 | 0.00047187 | 3.3262 |
| LUF6283                                                                                                                          | 5.4734 | 2.4524 | 0.014105   | 1.8506 |
| MFCD12912432                                                                                                                     | 5.5905 | 2.483  | 0.0044572  | 2.3509 |
| Kynurenic acid                                                                                                                   | 5.6549 | 2.4995 | 0.0090399  | 2.0438 |
| 2,2'-Iminodipropan-1-ol                                                                                                          | 5.673  | 2.5041 | 0.017493   | 1.7571 |
| (Z)-N-(1-Hydroxy-2-((Z)-[(2E)-1-hydroxy-3-(4-hydroxy-3-methoxyphenyl)-2-propen-1-ylidene]amino)ethylidene)phenylalanine          | 5.7005 | 2.5111 | 0.031468   | 1.5021 |
| [4-(Sulfooxy)phenyl]acetic acid                                                                                                  | 5.7295 | 2.5184 | 0.0071609  | 2.145  |

|                                                                                                                                      |        |        |            |        |
|--------------------------------------------------------------------------------------------------------------------------------------|--------|--------|------------|--------|
| [Similar to: 2-(4,4-diphenyl-1-piperidinobuta-1,3-dienyl)phenyl acetate; _Mass: -147.2111 Da]                                        | 5.7681 | 2.5281 | 0.031426   | 1.5027 |
| 3-[4-(Sulfooxy)phenyl]-2-oxiranecarboxylic acid                                                                                      | 5.8032 | 2.5369 | 0.016739   | 1.7763 |
| 8-Amino-7-oxononanoic acid                                                                                                           | 5.8375 | 2.5454 | 0.00062902 | 3.2013 |
| 3-[3-Methoxy-4-(sulfooxy)phenyl]propanoic acid                                                                                       | 5.8795 | 2.5557 | 0.0071155  | 2.1478 |
| 1774244                                                                                                                              | 5.9159 | 2.5646 | 0.0013535  | 2.8685 |
| 2-Hydroxy-5-vinylphenyl hydrogen sulfate                                                                                             | 5.9322 | 2.5686 | 0.015544   | 1.8084 |
| GSK2879552                                                                                                                           | 5.9451 | 2.5717 | 0.0015697  | 2.8042 |
| 4-Formyl-2-methoxyphenyl hydrogen sulfate                                                                                            | 5.9994 | 2.5848 | 0.0034216  | 2.4658 |
| 3-Methoxy-4-hydroxyphenylethyleneglycol sulfate                                                                                      | 6.0615 | 2.5997 | 0.01102    | 1.9578 |
| Phenylacetyl glycine                                                                                                                 | 6.0763 | 2.6032 | 0.0016056  | 2.7944 |
| Lanthionine ketimine                                                                                                                 | 6.1495 | 2.6205 | 0.003696   | 2.4323 |
| N-Acetylvaline                                                                                                                       | 6.2864 | 2.6522 | 0.00056461 | 3.2482 |
| Butyryl-L-homoserine lactone                                                                                                         | 6.3339 | 2.6631 | 0.0028352  | 2.5474 |
| Misonidazole                                                                                                                         | 6.4012 | 2.6784 | 0.020713   | 1.6838 |
| (+)-homotyrosine                                                                                                                     | 6.4171 | 2.6819 | 0.0042415  | 2.3725 |
| 6-Methoxy-1H-indol-5-yl-D-glucopyranosiduronic acid                                                                                  | 6.4643 | 2.6925 | 0.024686   | 1.6075 |
| Dynone                                                                                                                               | 6.474  | 2.6947 | 0.027811   | 1.5558 |
| N-Acetyl-L-histidine                                                                                                                 | 6.6125 | 2.7252 | 0.0065123  | 2.1863 |
| (5E,7E)-8-Nitro-5,7-tetradecadienoic acid                                                                                            | 6.6718 | 2.7381 | 0.0024718  | 2.607  |
| Diethyl phenyl phosphate                                                                                                             | 6.7364 | 2.752  | 0.0073387  | 2.1344 |
| hexobarbital                                                                                                                         | 6.9577 | 2.7986 | 0.0045822  | 2.3389 |
| Nicotinuric acid                                                                                                                     | 6.9608 | 2.7993 | 0.003177   | 2.498  |
| (5-Oxo-2-sulfo-2,5-dihydro-2-furanyl)acetic acid                                                                                     | 7.0094 | 2.8093 | 0.007401   | 2.1307 |
| Cinnamoyl glycine                                                                                                                    | 7.1348 | 2.8349 | 0.0065327  | 2.1849 |
| [Similar to: Alfentanil; _Mass: -252.1581 Da]                                                                                        | 7.1705 | 2.8421 | 0.025474   | 1.5939 |
| 6,7,8-Trimethoxy-1-methyl-1,2,3,4-tetrahydroisoquinoline                                                                             | 7.3413 | 2.876  | 0.00058043 | 3.2362 |
| 1-Methylpseudouridine                                                                                                                | 7.4523 | 2.8977 | 0.0058078  | 2.236  |
| 2-methoxyacetaminophen sulfate                                                                                                       | 7.5801 | 2.9222 | 0.0063136  | 2.1997 |
| (2S)-3-Hydroxy-2-(((3S,4S,5R)-2,3,4-trihydroxy-5-(hydroxymethyl)tetrahydro-2-furanyl)methyl)amino)butanoic acid (non-preferred name) | 7.7467 | 2.9536 | 0.029199   | 1.5346 |
| 8-Hydroxy-2-quinolinyl beta-D-glucopyranosiduronic acid                                                                              | 7.9942 | 2.9989 | 0.0037903  | 2.4213 |
| 3-(3,5-Dihydroxyphenyl)propanoyl hydrogen sulfate                                                                                    | 8.0733 | 3.0132 | 0.0022612  | 2.6457 |



|                                                                                                                                                                           |        |        |            |        |
|---------------------------------------------------------------------------------------------------------------------------------------------------------------------------|--------|--------|------------|--------|
| 2,3-Dihydroxy-2-(4-hydroxy-3-methoxybenzyl)succinic acid                                                                                                                  | 8.4205 | 3.0739 | 0.0027941  | 2.5538 |
| Geranylarnesyl pyrophosphate                                                                                                                                              | 8.4433 | 3.0778 | 0.026998   | 1.5687 |
| (6R,7S)-6,7-Dihydroxy-8-methyl-8-azabicyclo[3.2.1]oct-3-yl (2E)-2-methyl-2-butenolate                                                                                     | 8.4566 | 3.0801 | 0.0012371  | 2.9076 |
| gamma-thiomethyl glutamate                                                                                                                                                | 8.564  | 3.0983 | 0.0022531  | 2.6472 |
| 4-Aminopyridine                                                                                                                                                           | 8.6267 | 3.1088 | 0.0022012  | 2.6573 |
| 3-Mercaptolactic acid                                                                                                                                                     | 8.9398 | 3.1602 | 0.0032021  | 2.4946 |
| Nitrosoheptamethyleneimine                                                                                                                                                | 9.955  | 3.3154 | 0.012131   | 1.9161 |
| Aminohippuric acid                                                                                                                                                        | 10.019 | 3.3247 | 0.001924   | 2.7158 |
| S-OXY CYSTEINE                                                                                                                                                            | 10.031 | 3.3265 | 0.019971   | 1.6996 |
| N-Isovalerylglycine                                                                                                                                                       | 10.116 | 3.3385 | 0.00090588 | 3.0429 |
| Guanidinosuccinic acid                                                                                                                                                    | 10.816 | 3.4351 | 0.038097   | 1.4191 |
| 5-ureidoimidazole-4-carboxylic acid                                                                                                                                       | 11.133 | 3.4768 | 0.0090902  | 2.0414 |
| [Similar to: 5-(((1S,4S)-4-{3,5-Dimethyl-1-[4-(trifluoromethyl)phenyl]-1H-pyrazol-4-yl}-2-cyclopenten-1-yl)amino)-3,3-dimethyl-5-oxopentanoic acid; _Mass: - 275.1538 Da] | 11.223 | 3.4884 | 0.0098836  | 2.0051 |
| acetylserine                                                                                                                                                              | 11.268 | 3.4942 | 0.015744   | 1.8029 |
| hexahydro-2-oxo-1h-thieno(3,4-d)imidazole-4-pentanoic acid                                                                                                                | 11.53  | 3.5273 | 0.0095516  | 2.0199 |
| methyl-2-pyrimidinepropanoic acid                                                                                                                                         | 12.02  | 3.5873 | 0.0084813  | 2.0715 |
| N-(5-Hydroxypentanoyl)glycine                                                                                                                                             | 12.297 | 3.6203 | 0.00089381 | 3.0488 |
| L-Cysteic acid                                                                                                                                                            | 12.502 | 3.644  | 0.017835   | 1.7487 |
| 2-Amino-4-[(3-aminopropyl)amino]butanoic acid                                                                                                                             | 13.639 | 3.7697 | 0.013296   | 1.8763 |
| Hexylbenzene                                                                                                                                                              | 14.415 | 3.8495 | 0.00060135 | 3.2209 |
| bendiocarb                                                                                                                                                                | 15.744 | 3.9767 | 0.011314   | 1.9464 |
| clavulanic acid                                                                                                                                                           | 16.087 | 4.0078 | 0.028955   | 1.5383 |
| L-Lysine lactam                                                                                                                                                           | 16.365 | 4.0326 | 0.016746   | 1.7761 |
| Methylenediurea                                                                                                                                                           | 16.387 | 4.0345 | 0.0045529  | 2.3417 |
| formylmethionine                                                                                                                                                          | 16.409 | 4.0364 | 0.049884   | 1.302  |
| p-Cresylsulfate                                                                                                                                                           | 17.236 | 4.1073 | 6.80E-05   | 4.1673 |
| [Similar to: (1'S,2'S)-3',11'-dihydroxy-1',2',5'-trimethyl-8'-oxaspiro[oxirane-2,12'-tricyclododecan]-5'-en-4'-one; _Mass: -0.1059 Da]                                    | 17.262 | 4.1095 | 0.0012334  | 2.9089 |
| Caffeic acid 3-sulfate                                                                                                                                                    | 17.979 | 4.1682 | 0.00064288 | 3.1919 |
| Helicid                                                                                                                                                                   | 20.742 | 4.3745 | 2.61E-05   | 4.584  |
| pyroglutamylglycine                                                                                                                                                       | 20.998 | 4.3922 | 9.57E-05   | 4.0191 |
| nitrilotriacetic acid                                                                                                                                                     | 21.234 | 4.4083 | 0.0047563  | 2.3227 |
| Methionine sulfone                                                                                                                                                        | 21.713 | 4.4405 | 0.021251   | 1.6726 |
| 2-Aminooctanedioic acid                                                                                                                                                   | 28.423 | 4.829  | 0.030362   | 1.5177 |

|                                                     |        |        |          |        |
|-----------------------------------------------------|--------|--------|----------|--------|
| (2S,4S)-4-Amino-2-hydroxy-2-methylpentanedioic acid | 49.859 | 5.6398 | 0.032039 | 1.4943 |
|-----------------------------------------------------|--------|--------|----------|--------|

**Table S3.** Untargeted metabolomic analysis in colon tissue of mice exposed to mixed polymer (2mg/week);  $p = 0.05$ . Data can be found in supplemental Excel Table S3.

**Table S4.**

| Untargeted Metabolomic Analysis in Colon Tissue of Mice Exposed to Mixed Polymer (4mg/week) p = 0.05                                                                                                                                                                                                               | FC       | log2(F C) | raw.pval   | - LOG10(p) |
|--------------------------------------------------------------------------------------------------------------------------------------------------------------------------------------------------------------------------------------------------------------------------------------------------------------------|----------|-----------|------------|------------|
| <b>Lower</b>                                                                                                                                                                                                                                                                                                       |          |           |            |            |
| 3-(Sulfooxy)butanoic acid                                                                                                                                                                                                                                                                                          | 0.095148 | -3.3937   | 0.0017433  | 2.7586     |
| dilauroyl peroxide                                                                                                                                                                                                                                                                                                 | 0.10621  | -3.235    | 0.0096062  | 2.0174     |
| (5beta)-Chola-7,9(11)-dien-24-oic acid                                                                                                                                                                                                                                                                             | 0.12527  | -2.9968   | 0.011634   | 1.9343     |
| 1-(16,17-Dimethoxyaspidospermidin-1-yl)ethanone                                                                                                                                                                                                                                                                    | 0.13459  | -2.8934   | 0.014705   | 1.8325     |
| 3-{1-Hydroxy-2-[13-hydroxy-13-(hydroxymethyl)-8-methylpodocarpan-14-yl]ethyl}-5-oxo-2,5-dihydro-2-furanyl (2E)-3-phenylacrylate                                                                                                                                                                                    | 0.13503  | -2.8887   | 0.009863   | 2.006      |
| BIBP-3226                                                                                                                                                                                                                                                                                                          | 0.16507  | -2.5988   | 0.034498   | 1.4622     |
| carzenide                                                                                                                                                                                                                                                                                                          | 0.16777  | -2.5755   | 0.0093915  | 2.0273     |
| Niacin                                                                                                                                                                                                                                                                                                             | 0.16806  | -2.573    | 0.0017038  | 2.7686     |
| BRACO-19                                                                                                                                                                                                                                                                                                           | 0.16944  | -2.5611   | 0.010207   | 1.9911     |
| delcorine                                                                                                                                                                                                                                                                                                          | 0.19735  | -2.3411   | 0.0048058  | 2.3182     |
| (1'R,2S,4'S,5S,6R,8'R,10'E,12'S,13'S,14'E,16'E,20'R,21'R,24'S)-6-[(2S)-2-Butanyl]-24'-hydroxy-21'-methoxy-5,11',13',22'-tetramethyl-2'-oxo-5,6-dihydrospiro[pyran-2,6'-[3,7,19]trioxatetracyclo[15.6.1.1~4,8~.0~20,24~]pentacosa[10,14,16,22]tetraen]-12'-yl 2,6-dideoxy-3-O-methyl-alpha-L-arabino-hexopyranoside | 0.19758  | -2.3395   | 0.0041709  | 2.3798     |
| [Similar to: 4-Dodecylbenzenesulfonic acid; _Mass: - 0.0364 Da]                                                                                                                                                                                                                                                    | 0.22078  | -2.1793   | 0.00033977 | 3.4688     |
| [Similar to: ethyl 5-[(2,3-dihydro-1-benzofuran-5-ylsulfonyl)amino]-2-piperidinobenzoate; _Mass: - 246.1395 Da]                                                                                                                                                                                                    | 0.22596  | -2.1458   | 0.00097539 | 3.0108     |
| Olean-18-en-3-yl (2E)-3-phenylacrylate                                                                                                                                                                                                                                                                             | 0.23625  | -2.0816   | 0.0015303  | 2.8152     |
| BRD6688                                                                                                                                                                                                                                                                                                            | 0.23666  | -2.0791   | 0.000511   | 3.2916     |
| stylisterol A                                                                                                                                                                                                                                                                                                      | 0.23685  | -2.078    | 0.02616    | 1.5824     |
| Rocuronium                                                                                                                                                                                                                                                                                                         | 0.24077  | -2.0543   | 0.029075   | 1.5365     |
| Leaf salicylate                                                                                                                                                                                                                                                                                                    | 0.24339  | -2.0386   | 0.0037546  | 2.4254     |
| BIX02189                                                                                                                                                                                                                                                                                                           | 0.24365  | -2.0371   | 0.0037676  | 2.4239     |
| exalamide                                                                                                                                                                                                                                                                                                          | 0.24472  | -2.0308   | 0.032903   | 1.4828     |
| Mono(2-ethylhexyl) phthalate (MEHP)                                                                                                                                                                                                                                                                                | 0.24774  | -2.0131   | 0.00070673 | 3.1507     |

|                                                                                                                                                                                                                |         |         |           |        |
|----------------------------------------------------------------------------------------------------------------------------------------------------------------------------------------------------------------|---------|---------|-----------|--------|
| 3-[2-[(E)-[3-(2-carboxylethyl)-5-[(4-ethyl-3-methyl-5-oxo-pyrrolidin-2-yl)methyl]-4-methyl-pyrrol-2-ylidene]methyl]-5-[(3-ethyl-4-methyl-5-oxo-pyrrolidin-2-yl)methyl]-4-methyl-1H-pyrrol-3-yl]propanoic acid  | 0.2518  | -1.9896 | 0.0038898 | 2.4101 |
| Adenine                                                                                                                                                                                                        | 0.25934 | -1.9471 | 0.0068638 | 2.1634 |
| N-undecanoyl-L-Homoserine lactone                                                                                                                                                                              | 0.26029 | -1.9418 | 0.01499   | 1.8242 |
| 4-Amino-1-[(2xi)-5-O-{hydroxy[(hydroxy{(2R)-2-[(12-methyltetradecanoyl)oxy]-3-[(22-methyltricosanoyl)oxy]propoxy}phosphoryl)oxy]phosphoryl)-beta-D-threo-pentofuranosyl]-2(1H)-pyrimidinone                    | 0.2659  | -1.9111 | 0.018889  | 1.7238 |
| 14-(2,6-dihydroxy-6-methyl-3-oxoheptan-2-yl)-4,13-dihydroxy-1,6,6,11,15-pentamethyl-5-[[3,4,5-trihydroxy-6-(hydroxymethyl)oxan-2-yl]oxy]tetracycloheptadec-7-en-17-one                                         | 0.28179 | -1.8273 | 0.0053185 | 2.2742 |
| (1E)-1,7-bis(4-hydroxyphenyl)hept-1-en-3-one                                                                                                                                                                   | 0.28308 | -1.8207 | 0.018716  | 1.7278 |
| 6-Isopropylidene-4,4a-dimethyl-7-oxodecahydro-2-naphthalenyl (2E)-3-(methylsulfanyl)acrylate                                                                                                                   | 0.28426 | -1.8147 | 0.0088085 | 2.0551 |
| butachlor [ANSI, JMAF, WSSA]                                                                                                                                                                                   | 0.28442 | -1.8139 | 0.0072924 | 2.1371 |
| 13,14-dihydro-15-keto-tetranor Prostaglandin D2                                                                                                                                                                | 0.28833 | -1.7942 | 0.0013354 | 2.8744 |
| [Similar to: (-)-Spiculisporic acid; _Mass: -0.0178 Da]                                                                                                                                                        | 0.28975 | -1.7871 | 0.0068757 | 2.1627 |
| (3Z)-4-(4-Methyl-1-piperazinyl)-3-(2-oxopropylidene)-1,3-dihydro-2H-1,5-benzodiazepin-2-one                                                                                                                    | 0.29084 | -1.7817 | 0.01077   | 1.9678 |
| GINKGOLIDE C                                                                                                                                                                                                   | 0.304   | -1.7178 | 0.0021156 | 2.6746 |
| 4-Undecylbenzenesulfonic acid                                                                                                                                                                                  | 0.30433 | -1.7163 | 0.018672  | 1.7288 |
| 2,4-Diaminotoluene                                                                                                                                                                                             | 0.3135  | -1.6734 | 0.01613   | 1.7924 |
| (2S)-2-Hydroxy-3-(palmitoyloxy)propyl 6-deoxy-6-sulfo-alpha-D-glucopyranoside                                                                                                                                  | 0.31486 | -1.6672 | 0.0055086 | 2.259  |
| Levonorgestrel                                                                                                                                                                                                 | 0.31753 | -1.6551 | 0.0082272 | 2.0847 |
| Gonan-3-yl hydrogen sulfate                                                                                                                                                                                    | 0.31978 | -1.6448 | 0.003174  | 2.4984 |
| (1E)-4-(2-Thienyl)-1-buten-3-yn-1-ol                                                                                                                                                                           | 0.31986 | -1.6445 | 0.034786  | 1.4586 |
| Piperonyl sulfoxide                                                                                                                                                                                            | 0.33304 | -1.5862 | 0.0061316 | 2.2124 |
| Paraldehyde                                                                                                                                                                                                    | 0.33462 | -1.5794 | 0.0065774 | 2.1819 |
| 6-[[6-Aminohexanoyl]amino]hexanoic acid                                                                                                                                                                        | 0.33509 | -1.5774 | 0.018405  | 1.7351 |
| Ostruthin                                                                                                                                                                                                      | 0.33676 | -1.5702 | 0.0036879 | 2.4332 |
| (4S,8S)-1-{1-[2-Amino-1-hydroxy-3-(4-hydroxycyclohexyl)propoxy]-2-pyrrolidinyl}-4-[(2S)-2-butanyl]-12-(dihydroxymethyl)-1-hydroxy-8-(hydroxymethyl)-14-methyl-2,6,10-trioxa-3,7,11-triazapentadecane-5,9-dione | 0.34347 | -1.5417 | 0.012001  | 1.9208 |
| 4-styrenesulfonic acid                                                                                                                                                                                         | 0.34608 | -1.5308 | 0.010342  | 1.9854 |
| VU0071063                                                                                                                                                                                                      | 0.35076 | -1.5115 | 0.024343  | 1.6136 |
| IE1225000                                                                                                                                                                                                      | 0.35121 | -1.5096 | 0.039263  | 1.406  |
| 6-Deoxypenciclovir                                                                                                                                                                                             | 0.3523  | -1.5051 | 0.025782  | 1.5887 |
| Leu-Leu                                                                                                                                                                                                        | 0.35914 | -1.4774 | 0.033331  | 1.4772 |
| [Similar to: 2-benzylideneindan-1-one; _Mass: -9.9663 Da]                                                                                                                                                      | 0.37956 | -1.3976 | 0.013403  | 1.8728 |

|                                                                                                                                                                                                                                                                                                  |         |         |                |        |
|--------------------------------------------------------------------------------------------------------------------------------------------------------------------------------------------------------------------------------------------------------------------------------------------------|---------|---------|----------------|--------|
| [Similar to: Sphingosine (d18:1); _Mass: -0.1187 Da]                                                                                                                                                                                                                                             | 0.38151 | -1.3902 | 0.016492       | 1.7827 |
| 4-Dodecylbenzenesulfonic acid                                                                                                                                                                                                                                                                    | 0.38577 | -1.3742 | 0.0036379      | 2.4392 |
| 5?-androstane-3?,17?-diol dipropionate                                                                                                                                                                                                                                                           | 0.38601 | -1.3733 | 0.044932       | 1.3474 |
| beta-L-fucose 1-phosphate                                                                                                                                                                                                                                                                        | 0.39333 | -1.3462 | 0.0095434      | 2.0203 |
| 15-Deoxy-_12,14 -Prostaglandin J2                                                                                                                                                                                                                                                                | 0.39352 | -1.3455 | 0.044031       | 1.3562 |
| PALGLY                                                                                                                                                                                                                                                                                           | 0.40288 | -1.3116 | 0.033661       | 1.4729 |
| [Similar to: N1-{5-[(4-chlorophenyl)thio]-4-fluoro-2-nitrophenyl}acetamide; _Mass: 0.1981 Da]                                                                                                                                                                                                    | 0.41443 | -1.2708 | 0.0009935<br>9 | 3.0028 |
| Ro 18-5364                                                                                                                                                                                                                                                                                       | 0.41712 | -1.2614 | 0.01564        | 1.8058 |
| Guanosine                                                                                                                                                                                                                                                                                        | 0.42065 | -1.2493 | 0.0044839      | 2.3483 |
| FENOFIBRATE-D6                                                                                                                                                                                                                                                                                   | 0.42658 | -1.2291 | 0.0056736      | 2.2461 |
| Glycyl-L-leucine                                                                                                                                                                                                                                                                                 | 0.43006 | -1.2174 | 0.0023628      | 2.6266 |
| [Similar to: Guanosine; _Mass: 36.9799 Da]                                                                                                                                                                                                                                                       | 0.44437 | -1.1702 | 0.012108       | 1.9169 |
| [Similar to: Guanosine; _Mass: 35.9766 Da]                                                                                                                                                                                                                                                       | 0.4527  | -1.1434 | 0.010069       | 1.997  |
| Oxacycloheptacosan-2-one                                                                                                                                                                                                                                                                         | 0.45302 | -1.1424 | 0.034008       | 1.4684 |
| Guanine                                                                                                                                                                                                                                                                                          | 0.45422 | -1.1385 | 0.011446       | 1.9414 |
| HP1760000                                                                                                                                                                                                                                                                                        | 0.46769 | -1.0964 | 0.045773       | 1.3394 |
| Phenelzine                                                                                                                                                                                                                                                                                       | 0.47869 | -1.0628 | 0.033802       | 1.4711 |
| alpha-D-Mannopyranosyl-(1->4)-6-deoxy-alpha-L-mannopyranosyl-(1->3)-1-O-{hydroxy[(hydroxy[(2Z,6Z,10Z,14Z,18Z,22Z,26Z,30Z,34E,38E)-3,7,11,15,19,23,27,31,35,39,43-undecamethyl-2,6,10,14,18,22,26,30,34,38,42-tetratetracontaundecaen-1-yl]oxy]phosphoryl)oxy]phosphoryl}-alpha-D-galactopyranose | 0.48916 | -1.0316 | 0.010245       | 1.9895 |
| Pimodivir                                                                                                                                                                                                                                                                                        | 0.49574 | -1.0123 | 0.044885       | 1.3479 |
| L-Alanyl-L-glutamine                                                                                                                                                                                                                                                                             | 0.4983  | -1.0049 | 0.022287       | 1.652  |
| Timonacic                                                                                                                                                                                                                                                                                        | 0.49901 | -1.0029 | 0.025717       | 1.5898 |
| <b>Higher</b>                                                                                                                                                                                                                                                                                    |         |         |                |        |
| Creatinine                                                                                                                                                                                                                                                                                       | 2.0165  | 1.0119  | 0.0030364      | 2.5176 |
| carglumic acid                                                                                                                                                                                                                                                                                   | 2.0587  | 1.0417  | 0.036757       | 1.4347 |
| tetramethyl Nordihydroguaiaretic Acid                                                                                                                                                                                                                                                            | 2.1222  | 1.0855  | 0.0057664      | 2.2391 |
| acetyltaurine                                                                                                                                                                                                                                                                                    | 2.1496  | 1.1041  | 0.020445       | 1.6894 |
| N3,N4-Dimethyl-L-arginine                                                                                                                                                                                                                                                                        | 2.1552  | 1.1078  | 0.0035976      | 2.444  |
| 9,10-Dihydroxy-11-(3-pentyl-2-oxiranyl)undecanoic acid                                                                                                                                                                                                                                           | 2.1592  | 1.1105  | 0.0064494      | 2.1905 |
| L-alpha-lysophosphatidylcholine                                                                                                                                                                                                                                                                  | 2.1639  | 1.1136  | 0.040638       | 1.3911 |
| 2-Chloro-N-[(2S,3R,4E)-1,3-dihydroxy-4-octadecen-2-yl]acetamide                                                                                                                                                                                                                                  | 2.204   | 1.1401  | 0.031375       | 1.5034 |
| 4-Ethyl-2,6-dihydroxyphenyl hydrogen sulfate                                                                                                                                                                                                                                                     | 2.2912  | 1.1961  | 0.0076246      | 2.1178 |
| Aminoparathion                                                                                                                                                                                                                                                                                   | 2.2956  | 1.1989  | 0.031467       | 1.5021 |
| bendiocarb                                                                                                                                                                                                                                                                                       | 2.312   | 1.2091  | 0.039767       | 1.4005 |
| Nigrifactin                                                                                                                                                                                                                                                                                      | 2.3154  | 1.2112  | 0.043521       | 1.3613 |
| 4-Amino-4-deoxypentopyranose                                                                                                                                                                                                                                                                     | 2.3246  | 1.217   | 0.0029461      | 2.5307 |
| 3-methylthymine                                                                                                                                                                                                                                                                                  | 2.3471  | 1.2309  | 0.044578       | 1.3509 |

|                                                                                             |        |        |                |        |
|---------------------------------------------------------------------------------------------|--------|--------|----------------|--------|
| D-Xyloic acid                                                                               | 2.3608 | 1.2393 | 0.018445       | 1.7341 |
| m-carboxyaniline                                                                            | 2.3616 | 1.2398 | 0.0093415      | 2.0296 |
| N-Acetylhistamine                                                                           | 2.3846 | 1.2538 | 0.019667       | 1.7063 |
| (2R)-2-Hydroxy-3-[(1Z)-1-tetradecen-1-yloxy]propyl 2-(trimethylammonio)ethyl phosphate      | 2.3978 | 1.2617 | 0.027499       | 1.5607 |
| Dihydroartemisinin                                                                          | 2.4326 | 1.2825 | 0.01127        | 1.9481 |
| Buprenorphine                                                                               | 2.4351 | 1.284  | 0.0050564      | 2.2962 |
| Vanillin                                                                                    | 2.4682 | 1.3034 | 0.047467       | 1.3236 |
| 2,2'-Iminodipropan-1-ol                                                                     | 2.4918 | 1.3172 | 0.036507       | 1.4376 |
| Glycylproline                                                                               | 2.5011 | 1.3225 | 0.0007880<br>2 | 3.1035 |
| Indole-3-acetic acid                                                                        | 2.5075 | 1.3262 | 0.034425       | 1.4631 |
| M2I-1                                                                                       | 2.5295 | 1.3389 | 0.021396       | 1.6697 |
| Glycocyamine                                                                                | 2.567  | 1.3601 | 0.028239       | 1.5492 |
| Imazapyr                                                                                    | 2.584  | 1.3696 | 0.036621       | 1.4363 |
| [Similar to: L-(-)-Malic acid; _Mass: 97.9674 Da]                                           | 2.5983 | 1.3776 | 0.006943       | 2.1585 |
| N-(tert-Butyl)-N'-(2-hydroxyethyl)urea                                                      | 2.6084 | 1.3831 | 0.043697       | 1.3596 |
| N,N-Dihydroxy-L-valine                                                                      | 2.6106 | 1.3844 | 0.0029355      | 2.5323 |
| 6,7,8-Trimethoxy-1-methyl-1,2,3,4-tetrahydroisoquinoline                                    | 2.625  | 1.3923 | 0.012103       | 1.9171 |
| ENU                                                                                         | 2.6526 | 1.4074 | 0.016508       | 1.7823 |
| N-(4-Heptanyl)-1,3-benzodioxole-5-carboxamide                                               | 2.6576 | 1.4101 | 0.03401        | 1.4684 |
| 2,2'-Sulfinyldiacetic acid                                                                  | 2.6684 | 1.416  | 0.017801       | 1.7496 |
| 3-Butene-1,2,3-tricarboxylic acid                                                           | 2.6969 | 1.4313 | 0.01825        | 1.7387 |
| Itaconic acid                                                                               | 2.7164 | 1.4417 | 0.0030147      | 2.5208 |
| (9Z,11E)-13-[(4Z,7Z,10Z,16Z,19Z)-4,7,10,13,16,19-Docosahexaenoxy]-9,11-octadecadienoic acid | 2.7218 | 1.4445 | 0.0033589      | 2.4738 |
| (-)-(alpha)-Kainic Acid                                                                     | 2.7389 | 1.4536 | 0.018663       | 1.729  |
| L-Iditol                                                                                    | 2.7436 | 1.4561 | 0.0062376      | 2.205  |
| N-Isovalerylglycine                                                                         | 2.7841 | 1.4772 | 0.0046369      | 2.3338 |
| metioprim                                                                                   | 2.7937 | 1.4822 | 0.0034215      | 2.4658 |
| 4-Hydroxyprolylleucine                                                                      | 2.8045 | 1.4877 | 0.041946       | 1.3773 |
| 3-Sulfamoylalanine                                                                          | 2.8107 | 1.4909 | 0.0073505      | 2.1337 |
| L-Cladinpyranose                                                                            | 2.8304 | 1.501  | 0.027472       | 1.5611 |
| 1-(1Z-hexadecenyl)-sn-glycero-3-phosphocholine                                              | 2.8465 | 1.5092 | 0.0013023      | 2.8853 |
| MMDPPO                                                                                      | 2.9129 | 1.5424 | 0.0091258      | 2.0397 |
| Crotonic acid                                                                               | 2.9334 | 1.5526 | 0.0082679      | 2.0826 |
| RH0365500                                                                                   | 2.979  | 1.5748 | 0.012905       | 1.8892 |
| Anthranil                                                                                   | 2.9956 | 1.5828 | 0.0040302      | 2.3947 |
| g-Guanidinobutyrate                                                                         | 3.0259 | 1.5974 | 0.0059721      | 2.2239 |
| [Similar to: 2-benzylideneindan-1-one; _Mass: 42.0277 Da]                                   | 3.032  | 1.6002 | 0.038013       | 1.4201 |
| 3-Hydroxysebacic acid                                                                       | 3.0504 | 1.609  | 0.01516        | 1.8193 |
| Aceglutamide                                                                                | 3.068  | 1.6173 | 0.007334       | 2.1347 |
| D-(+)-Xylose                                                                                | 3.1494 | 1.6551 | 0.024709       | 1.6071 |
| (Hydroxyethyl)methacrylate                                                                  | 3.1651 | 1.6622 | 0.035069       | 1.4551 |

|                                                                                              |        |        |                |        |
|----------------------------------------------------------------------------------------------|--------|--------|----------------|--------|
| N6,N6,N6-Trimethyl-L-lysine                                                                  | 3.1754 | 1.6669 | 0.023384       | 1.6311 |
| Methyl (10E)-11-(6-ethyl-2,3-dioxabicyclo[2.2.1]hept-5-yl)-9-hydroperoxy-10-undecenoate      | 3.1797 | 1.6689 | 0.017603       | 1.7544 |
| 4-(Hydroxymethyl)benzenesulfonic acid                                                        | 3.2178 | 1.6861 | 0.0018735      | 2.7273 |
| 3-Buten-1-amine                                                                              | 3.2757 | 1.7118 | 0.0038976      | 2.4092 |
| 2271703                                                                                      | 3.2775 | 1.7126 | 0.032416       | 1.4892 |
| (6R,7S)-6,7-Dihydroxy-8-methyl-8-azabicyclo[3.2.1]oct-3-yl (2E)-2-methyl-2-butenolate        | 3.2981 | 1.7216 | 0.0002438<br>1 | 3.6129 |
| Glycerone sulfate                                                                            | 3.3053 | 1.7248 | 0.0066425      | 2.1777 |
| N-Hydroxy-meIQX                                                                              | 3.3653 | 1.7507 | 0.0067172      | 2.1728 |
| 4-Aminopyridine                                                                              | 3.4576 | 1.7898 | 0.0039223      | 2.4065 |
| PD 161570                                                                                    | 3.4933 | 1.8046 | 0.044556       | 1.3511 |
| 3-Hydroxy-N-[(3S)-2-oxotetrahydro-3-furanyl]octanamide                                       | 3.4938 | 1.8048 | 0.0049527      | 2.3052 |
| nitrilotriacetic acid                                                                        | 3.571  | 1.8363 | 0.0090249      | 2.0446 |
| C8-HSL                                                                                       | 3.5743 | 1.8377 | 0.043975       | 1.3568 |
| D-( <u>  </u> )-Erythrose                                                                    | 3.6025 | 1.849  | 0.031701       | 1.4989 |
| [Similar to: 2-(4,4-diphenyl-1-piperidinobuta-1,3-dienyl)phenyl acetate; _Mass: 185.1721 Da] | 3.6665 | 1.8744 | 0.010598       | 1.9748 |
| Crotanecine                                                                                  | 3.683  | 1.8809 | 0.0024184      | 2.6165 |
| 635994                                                                                       | 3.8493 | 1.9446 | 0.0017784      | 2.75   |
| bisbenzimidazole                                                                             | 3.8582 | 1.9479 | 0.049136       | 1.3086 |
| hexahydro-2-oxo-1h-thieno(3,4-d)imidazole-4-pentanoic acid                                   | 3.8605 | 1.9488 | 0.0001039      | 3.9834 |
| Methylsuccinic acid                                                                          | 3.9223 | 1.9717 | 0.013101       | 1.8827 |
| 4-Acetamidobutanoic acid                                                                     | 3.9586 | 1.985  | 0.0023475      | 2.6294 |
| 4-Oxo-4-(3-pyridyl)butyric acid                                                              | 3.9724 | 1.99   | 0.042446       | 1.3722 |
| 4-ACETAMIDO BUTYRIC ACID                                                                     | 3.9752 | 1.991  | 0.0051833      | 2.2854 |
| VQH                                                                                          | 3.9975 | 1.9991 | 0.014582       | 1.8362 |
| SA1850000                                                                                    | 4.016  | 2.0058 | 0.0029421      | 2.5313 |
| methyl-2-pyrimidinepropanoic acid                                                            | 4.0275 | 2.0099 | 7.88E-05       | 4.1036 |
| [Similar to: Flavin adenine dinucleotide (FAD); _Mass: -589.2222 Da]                         | 4.0414 | 2.0148 | 0.012379       | 1.9073 |
| 19(R)-hydroxy Prostaglandin F1?                                                              | 4.042  | 2.0151 | 0.018437       | 1.7343 |
| Formylisoglutamine                                                                           | 4.1949 | 2.0686 | 0.028277       | 1.5486 |
| Gentioflavine                                                                                | 4.2289 | 2.0803 | 0.01177        | 1.9292 |
| Oleandrose                                                                                   | 4.2444 | 2.0856 | 0.032668       | 1.4859 |
| 4-Guanidinobutyric acid                                                                      | 4.2887 | 2.1005 | 0.0099257      | 2.0032 |
| Terephthalic acid                                                                            | 4.4103 | 2.1409 | 0.0007951<br>4 | 3.0996 |
| [Similar to: Alfentanil; _Mass: -252.1581 Da]                                                | 4.4161 | 2.1428 | 0.031031       | 1.5082 |
| 1-(2-Isopropylidenehydrazino)phthalazine                                                     | 4.4359 | 2.1492 | 0.0001742<br>8 | 3.7588 |
| Glycine                                                                                      | 4.4737 | 2.1615 | 0.0008438<br>2 | 3.0738 |
| Uridine 5'-diphosphoglucuronic acid                                                          | 4.5325 | 2.1803 | 0.045521       | 1.3418 |

|                                                                                                                   |        |        |                |        |
|-------------------------------------------------------------------------------------------------------------------|--------|--------|----------------|--------|
| N-Acetylgalactosamine 6-sulfate                                                                                   | 4.5358 | 2.1813 | 0.0093558      | 2.0289 |
| BD-AcAc2                                                                                                          | 4.6237 | 2.209  | 0.0023948      | 2.6207 |
| Isoleucyl-4-hydroxyproline                                                                                        | 4.6699 | 2.2234 | 0.017109       | 1.7668 |
| 5-Formyl-2-furoic acid                                                                                            | 4.7406 | 2.2451 | 0.0006345      | 3.1976 |
| deaminoneuraminic acid                                                                                            | 4.8331 | 2.273  | 0.023837       | 1.6228 |
| DL-Cerulenin                                                                                                      | 4.9243 | 2.2999 | 0.037886       | 1.4215 |
| 4-hydroxy Alternariol                                                                                             | 4.9282 | 2.3011 | 0.001071       | 2.9702 |
| Ferulic acid 4-sulfate                                                                                            | 5.0463 | 2.3352 | 0.006019       | 2.2205 |
| 5-Butyloxazole                                                                                                    | 5.048  | 2.3357 | 0.011452       | 1.9411 |
| 5-sulfooxymethylfurfural                                                                                          | 5.0604 | 2.3392 | 0.0052092      | 2.2832 |
| Trigonelline                                                                                                      | 5.0823 | 2.3455 | 0.014828       | 1.8289 |
| 3-Indoxyl sulphate                                                                                                | 5.1008 | 2.3507 | 0.002502       | 2.6017 |
| Sulfosalicylic Acid                                                                                               | 5.1667 | 2.3692 | 0.0027885      | 2.5546 |
| 1-Methylimidazoleacetic acid                                                                                      | 5.1667 | 2.3692 | 0.031447       | 1.5024 |
| Acetanilide                                                                                                       | 5.1693 | 2.37   | 0.0012557      | 2.9011 |
| tensyucic acid E                                                                                                  | 5.2238 | 2.3851 | 0.0041377      | 2.3832 |
| N-Acetylvaline                                                                                                    | 5.2558 | 2.3939 | 0.0010582      | 2.9754 |
| 4-Acetamidobenzoic acid                                                                                           | 5.2591 | 2.3948 | 0.010648       | 1.9727 |
| (5Z)-2-Amino-4,5-dihydroxy-5-(((1E)-2-(hydroxymethyl)-1,3-butadien-1-yl]imino}pentanoic acid (non-preferred name) | 5.3467 | 2.4187 | 0.0031293      | 2.5046 |
| N-Acetyl-Trp-OH                                                                                                   | 5.4446 | 2.4448 | 0.003726       | 2.4288 |
| Isobutyric acid                                                                                                   | 5.4457 | 2.4451 | 0.0038422      | 2.4154 |
| (S)-(+)-allantoin                                                                                                 | 5.4926 | 2.4575 | 0.018391       | 1.7354 |
| 4-ethylphenylsulfonic acid                                                                                        | 5.5269 | 2.4665 | 0.027205       | 1.5654 |
| 4-Ethyl-2-hydroxy-6-methoxyphenyl hydrogen sulfate                                                                | 5.5269 | 2.4665 | 0.027205       | 1.5654 |
| [Similar to: 2-[(1H-1,2,4-triazol-3-ylimino)methyl]phenol; _Mass: -94.0626 Da]                                    | 5.5269 | 2.4665 | 0.027205       | 1.5654 |
| Ethyl sulfate                                                                                                     | 5.5681 | 2.4772 | 0.0009064<br>8 | 3.0426 |
| LOC14                                                                                                             | 5.6068 | 2.4872 | 0.0068927      | 2.1616 |
| Nicotinyl methylamide                                                                                             | 5.7083 | 2.5131 | 0.017722       | 1.7515 |
| 5-Hydantoinpropionic acid                                                                                         | 5.8782 | 2.5554 | 0.038521       | 1.4143 |
| 3-hydroxy-2-methylbutyric acid                                                                                    | 5.8808 | 2.556  | 0.029738       | 1.5267 |
| Vanillic acid 4-sulfate                                                                                           | 5.9509 | 2.5731 | 0.0047401      | 2.3242 |
| 3,4-Dihydroxybenzenesulfonic acid                                                                                 | 5.9711 | 2.578  | 0.0086531      | 2.0628 |
| Pal-GHK                                                                                                           | 6.0086 | 2.587  | 0.0030019      | 2.5226 |
| Allantoin                                                                                                         | 6.0375 | 2.5939 | 0.015391       | 1.8127 |
| Methylhippuric acid                                                                                               | 6.0384 | 2.5942 | 0.0005570<br>7 | 3.2541 |
| (5E,7E)-8-Nitro-5,7-tetradecadienoic acid                                                                         | 6.1384 | 2.6179 | 0.0029804      | 2.5257 |
| 2,4,5-trimethoxyamphetamine                                                                                       | 6.1579 | 2.6224 | 0.034681       | 1.4599 |
| MST-312                                                                                                           | 6.2622 | 2.6467 | 0.0013664      | 2.8644 |
| Resorcinol                                                                                                        | 6.4386 | 2.6868 | 0.011959       | 1.9223 |
| 3-Hydroxy-5-methyl-L-tyrosine                                                                                     | 6.6964 | 2.7434 | 0.0279         | 1.5544 |
| 6-Acetamido-2-oxohexanoic acid                                                                                    | 6.7501 | 2.7549 | 0.0049168      | 2.3083 |



|                                                                                                                         |        |        |                |        |
|-------------------------------------------------------------------------------------------------------------------------|--------|--------|----------------|--------|
| N-Acetyl-L-histidine                                                                                                    | 6.7888 | 2.7632 | 0.017139       | 1.766  |
| Saccharin                                                                                                               | 6.9465 | 2.7963 | 0.030045       | 1.5222 |
| Hippuric acid                                                                                                           | 6.9564 | 2.7983 | 0.0075353      | 2.1229 |
| 3-(Sulfooxy)benzenepropanoic acid                                                                                       | 6.9812 | 2.8035 | 0.0096742      | 2.0144 |
| Dihydrouridine                                                                                                          | 7.0034 | 2.8081 | 0.0056296      | 2.2495 |
| (Z)-N-(1-Hydroxy-2-((Z)-[(2E)-1-hydroxy-3-(4-hydroxy-3-methoxyphenyl)-2-propen-1-ylidene]amino)ethylidene)phenylalanine | 7.1965 | 2.8473 | 0.0039821      | 2.3999 |
| Butyryl-L-homoserine lactone                                                                                            | 7.2691 | 2.8618 | 0.0026768      | 2.5724 |
| Resorcinolnaphthalein                                                                                                   | 7.2875 | 2.8654 | 0.018378       | 1.7357 |
| [Similar to: 3-Coumaric acid; _Mass: 79.9760 Da]                                                                        | 7.323  | 2.8724 | 0.026879       | 1.5706 |
| N-Boc-L-proline                                                                                                         | 7.362  | 2.8801 | 0.0049434      | 2.306  |
| Nitrosoheptamethyleneimine                                                                                              | 7.4101 | 2.8895 | 0.0076818      | 2.1145 |
| PRIMA-1                                                                                                                 | 7.4287 | 2.8931 | 0.0099132      | 2.0038 |
| 3-[4-(Sulfooxy)phenyl]acrylic acid                                                                                      | 7.4859 | 2.9042 | 0.0019974      | 2.6995 |
| Xanthurenic acid                                                                                                        | 7.5441 | 2.9154 | 0.0005592<br>1 | 3.2524 |
| Cinnamoyl glycine                                                                                                       | 7.6344 | 2.9325 | 0.0076964      | 2.1137 |
| Hexylbenzene                                                                                                            | 7.646  | 2.9347 | 0.0004245<br>8 | 3.372  |
| Benzoic acid                                                                                                            | 7.7254 | 2.9496 | 0.004684       | 2.3294 |
| L-Ascorbic acid 2-sulfate                                                                                               | 7.9089 | 2.9835 | 0.0095467      | 2.0201 |
| 3-Hydroxysuberic acid                                                                                                   | 7.9123 | 2.9841 | 0.04755        | 1.3228 |
| _Alanine                                                                                                                | 8.1149 | 3.0206 | 0.043069       | 1.3658 |
| 4-Methylphenol                                                                                                          | 8.1265 | 3.0226 | 3.95E-05       | 4.4029 |
| N-Acetylcitrulline                                                                                                      | 8.2993 | 3.053  | 0.012438       | 1.9053 |
| Benzyl 2-oxohexahydrocyclopropa[d]imidazole-1-carboxylate                                                               | 8.3022 | 3.0535 | 0.0025046      | 2.6013 |
| Zalcitabine                                                                                                             | 8.467  | 3.0818 | 0.0027773      | 2.5564 |
| 4-Phenolsulfonic acid                                                                                                   | 8.5363 | 3.0936 | 0.002789       | 2.5546 |
| 3-hydroxy-3-(3-hydroxyphenyl)propanoic acid-O-sulphate                                                                  | 8.5502 | 3.096  | 0.036783       | 1.4343 |
| MFCD12912432                                                                                                            | 8.615  | 3.1068 | 0.0026428      | 2.5779 |
| 8-Amino-7-oxononanoic acid                                                                                              | 8.8147 | 3.1399 | 6.38E-06       | 5.1954 |
| Benalfocin                                                                                                              | 9.0922 | 3.1846 | 0.0039254      | 2.4061 |
| guaiacol sulfate                                                                                                        | 9.3351 | 3.2227 | 0.0007749<br>5 | 3.1107 |
| Gly-Lys                                                                                                                 | 9.603  | 3.2635 | 0.0045528      | 2.3417 |
| 6-Methoxy-1H-indol-5-yl-D-glucopyranosiduronic acid                                                                     | 9.6428 | 3.2694 | 0.006175       | 2.2094 |
| [Similar to: 7-Oxobenz[de]anthracene; _Mass: 6.9939 Da]                                                                 | 9.6655 | 3.2728 | 0.039056       | 1.4083 |
| 4-Acetamido-2-amino-6-nitrotoluene                                                                                      | 9.7175 | 3.2806 | 0.017133       | 1.7662 |
| alpha-Methyl D-mannoside                                                                                                | 9.9595 | 3.3161 | 0.0022403      | 2.6497 |
| 5-Nitro-o-toluidine                                                                                                     | 9.9738 | 3.3181 | 0.0006537<br>7 | 3.1846 |

|                                                                                                                                                           |        |        |                |        |
|-----------------------------------------------------------------------------------------------------------------------------------------------------------|--------|--------|----------------|--------|
| Aminohippuric acid                                                                                                                                        | 10.144 | 3.3425 | 0.0009334<br>1 | 3.0299 |
| N5-(1-Iminoethyl)-L-ornithine                                                                                                                             | 10.212 | 3.3522 | 0.0007303<br>2 | 3.1365 |
| (+)-homotyrosine                                                                                                                                          | 10.284 | 3.3623 | 0.0058653      | 2.2317 |
| APR-246                                                                                                                                                   | 10.314 | 3.3665 | 0.010134       | 1.9942 |
| propionylcarnitine                                                                                                                                        | 10.515 | 3.3944 | 0.009279       | 2.0325 |
| xanthurenic acid 8-O-sulfate                                                                                                                              | 10.61  | 3.4074 | 0.041436       | 1.3826 |
| 1-Methylpseudouridine                                                                                                                                     | 10.616 | 3.4082 | 0.010099       | 1.9957 |
| 4-(2-Hydroxyethyl)phenyl hydrogen sulfate                                                                                                                 | 10.961 | 3.4544 | 0.0023775      | 2.6239 |
| Benzenol                                                                                                                                                  | 11.127 | 3.476  | 0.0011497      | 2.9394 |
| hexobarbital                                                                                                                                              | 11.192 | 3.4844 | 0.0047492      | 2.3234 |
| Lanthionine ketimine                                                                                                                                      | 11.27  | 3.4945 | 0.0051772      | 2.2859 |
| 2616                                                                                                                                                      | 11.426 | 3.5142 | 0.03526        | 1.4527 |
| Phenylacetylglucine                                                                                                                                       | 11.559 | 3.531  | 0.0008564<br>8 | 3.0673 |
| Homocitrulline                                                                                                                                            | 11.657 | 3.5432 | 0.024868       | 1.6044 |
| Nicotinuric acid                                                                                                                                          | 12.253 | 3.6151 | 0.001743       | 2.7587 |
| 2-methoxyacetaminophen sulfate                                                                                                                            | 12.557 | 3.6504 | 0.0032044      | 2.4943 |
| 3-[3-Methoxy-4-(sulfooxy)phenyl]propanoic acid                                                                                                            | 12.809 | 3.6791 | 0.0064729      | 2.1889 |
| 4-Hydroxy-3-(sulfooxy)benzoic acid                                                                                                                        | 12.9   | 3.6893 | 0.0027526      | 2.5602 |
| Kynurenic acid                                                                                                                                            | 13.026 | 3.7033 | 0.01588        | 1.7992 |
| [Similar to: N_ -{[(1S,3R,4R,5S)-1,3,4-trihydroxy-5-<br>{[(phenylsulfonyl)acetyl]amino}cyclohexyl]carbonyl}-D-<br>phenylalaninamide; _Mass: -354.1024 Da] | 13.242 | 3.727  | 0.041634       | 1.3805 |
| 3-[4-(Sulfooxy)phenyl]-2-oxiranecarboxylic acid                                                                                                           | 13.993 | 3.8066 | 0.0049956      | 2.3014 |
| 2,3-Dihydroxy-2-(4-hydroxy-3-methoxybenzyl)succinic<br>acid                                                                                               | 14.004 | 3.8077 | 0.001926       | 2.7153 |
| 2-Hydroxy-5-vinylphenyl hydrogen sulfate                                                                                                                  | 14.128 | 3.8205 | 0.0039102      | 2.4078 |
| Diethyl phenyl phosphate                                                                                                                                  | 14.131 | 3.8208 | 0.0051974      | 2.2842 |
| 1228222                                                                                                                                                   | 14.282 | 3.8362 | 0.0070422      | 2.1523 |
| 4-Formyl-2-methoxyphenyl hydrogen sulfate                                                                                                                 | 14.333 | 3.8413 | 0.0033821      | 2.4708 |
| 3-Ureidopropionic acid                                                                                                                                    | 14.762 | 3.8838 | 0.010498       | 1.9789 |
| Ribazole 5-phosphate                                                                                                                                      | 15.646 | 3.9677 | 0.0023597      | 2.6271 |
| [4-(Sulfooxy)phenyl]acetic acid                                                                                                                           | 15.678 | 3.9707 | 0.0020764      | 2.6827 |
| 3-Methoxy-4-hydroxyphenylethyleneglycol sulfate                                                                                                           | 15.767 | 3.9789 | 0.0056204      | 2.2502 |
| 8-Hydroxy-2-quinolinyl beta-D-glucopyranosiduronic<br>acid                                                                                                | 15.994 | 3.9994 | 0.0029979      | 2.5232 |
| 3-(3,5-Dihydroxyphenyl)propanoyl hydrogen sulfate                                                                                                         | 17.442 | 4.1245 | 0.0034464      | 2.4626 |
| 3-Mercaptolactic acid                                                                                                                                     | 18.133 | 4.1805 | 0.0001172<br>5 | 3.9309 |
| 1774244                                                                                                                                                   | 18.577 | 4.2154 | 0.0002081<br>9 | 3.6815 |
| 5-ureidoimidazole-4-carboxylic acid                                                                                                                       | 19.573 | 4.2908 | 0.031797       | 1.4976 |
| 4-Hydroxy-3- methoxyphenylglycol sulfate                                                                                                                  | 24.12  | 4.5921 | 0.016475       | 1.7832 |

|                                                                                                                                        |        |        |           |        |
|----------------------------------------------------------------------------------------------------------------------------------------|--------|--------|-----------|--------|
| [Similar to: (1'S,2'S)-3',11'-dihydroxy-1',2',5'-trimethyl-8'-oxaspiro[oxirane-2,12'-tricyclododecan]-5'-en-4'-one; _Mass: -0.1059 Da] | 34.811 | 5.1215 | 0.0039876 | 2.3993 |
| Helicid                                                                                                                                | 38.867 | 5.2805 | 1.12E-06  | 5.9495 |
| Caffeic acid 3-sulfate                                                                                                                 | 39.916 | 5.3189 | 0.0057502 | 2.2403 |
| (5-Oxo-2-sulfo-2,5-dihydro-2-furanyl)acetic acid                                                                                       | 43.55  | 5.4446 | 0.012707  | 1.8959 |
| p-Cresylsulfate                                                                                                                        | 51.917 | 5.6981 | 3.19E-06  | 5.4968 |

**Table S4.** Untargeted metabolomic analysis in colon tissue of mice exposed to mixed polymer microspheres (4mg/week);  $p = 0.05$ . Data can be found in supplemental Excel Table S4.

**Table S5.**

| Untargeted Metabolomic Analysis in Liver Tissue of Mice Exposed to Polystyrene (2mg/week) p = 0.05                   | FC      | log2(FC) | raw.pval   | -<br>LOG10(p) |
|----------------------------------------------------------------------------------------------------------------------|---------|----------|------------|---------------|
| <b>Lower</b>                                                                                                         |         |          |            |               |
| pro-trp                                                                                                              | 0.12397 | -3.012   | 4.05E-06   | 5.3928        |
| DL-2,6-Diaminopimelic acid                                                                                           | 0.16808 | -2.5728  | 0.0002662  | 3.5748        |
| pro-met                                                                                                              | 0.18241 | -2.4548  | 0.0017532  | 2.7562        |
| PGB1                                                                                                                 | 0.19182 | -2.3822  | 2.20E-05   | 4.6577        |
| Ectoine                                                                                                              | 0.22612 | -2.1448  | 0.00011439 | 3.9416        |
| Glycylnorvaline                                                                                                      | 0.22612 | -2.1448  | 0.00011439 | 3.9416        |
| 3-Thiomorpholinecarboxylic acid                                                                                      | 0.22969 | -2.1222  | 8.18E-06   | 5.0875        |
| [Similar to: 5,7-dihydroxy-3-(4-hydroxyphenyl)-6-methoxy-4H-chromen-4-one; _Mass: -24.9442 Da]                       | 0.22975 | -2.1219  | 0.02324    | 1.6338        |
| ALA-GLU                                                                                                              | 0.23002 | -2.1202  | 0.00018982 | 3.7217        |
| N-acetyl-beta-D-glucosaminyamine                                                                                     | 0.23913 | -2.0642  | 1.11E-05   | 4.9537        |
| 5,6-Dihydroxy-3-methyl-2(1H)-quinolinone                                                                             | 0.24505 | -2.0289  | 0.00036541 | 3.4372        |
| thr-arg                                                                                                              | 0.24695 | -2.0177  | 9.26E-05   | 4.0333        |
| ser-arg                                                                                                              | 0.25696 | -1.9604  | 0.0001399  | 3.8542        |
| Kynurenine                                                                                                           | 0.26096 | -1.9381  | 0.00032779 | 3.4844        |
| N-(2-Methoxyethyl)-3-{5-[(2S)-1-methyl-2-pyrrolidinyl]-1,2,4-oxadiazol-3-yl}-2-pyridinamine                          | 0.26365 | -1.9233  | 0.00031134 | 3.5068        |
| Aceglutamide                                                                                                         | 0.27699 | -1.8521  | 0.0068355  | 2.1652        |
| 2-[2-oxo-2-(pyridin-3-ylamino)ethoxy]acetic acid                                                                     | 0.28021 | -1.8354  | 0.0038585  | 2.4136        |
| Gly-Arg                                                                                                              | 0.2856  | -1.8079  | 0.00037314 | 3.4281        |
| Physovenine                                                                                                          | 0.28729 | -1.7994  | 0.0025123  | 2.5999        |
| beta-Alanyl-L-arginine                                                                                               | 0.289   | -1.7908  | 6.34E-05   | 4.1977        |
| MFCD00025555                                                                                                         | 0.29144 | -1.7788  | 2.17E-05   | 4.6627        |
| Threonylglutamine                                                                                                    | 0.29448 | -1.7638  | 0.00010108 | 3.9953        |
| (15Z,19R)-25-Amino-22-hydroxy-22-oxido-17,21,23-trioxa-22lambda~5~-phosphapentacos-15-en-19-yl (9Z)-9-pentadecenoate | 0.29758 | -1.7487  | 7.06E-05   | 4.1513        |
| b-Ala-Lys                                                                                                            | 0.29919 | -1.7409  | 0.00030653 | 3.5135        |
| (2S,3R,5S)-3-(2-Aminoethyl)-7-oxo-4-oxa-1-azabicyclo[3.2.0]heptane-2-carboxylic acid                                 | 0.30098 | -1.7323  | 0.00010915 | 3.962         |
| ser-asn                                                                                                              | 0.30568 | -1.7099  | 8.38E-05   | 4.077         |
| Protoporphyrin IX                                                                                                    | 0.30764 | -1.7007  | 0.0016924  | 2.7715        |
| ethyl 2-cyano-3-(3-pyridinyl)acrylate                                                                                | 0.31518 | -1.6657  | 0.0017776  | 2.7502        |
| afegostat                                                                                                            | 0.31721 | -1.6565  | 8.50E-06   | 5.0705        |
| Glycyl-L-leucine                                                                                                     | 0.31721 | -1.6565  | 8.50E-06   | 5.0705        |
| (2R,6S)-2,6-Diamino-3-hydroxyheptanedioic acid                                                                       | 0.31742 | -1.6555  | 3.76E-05   | 4.4248        |

|                                                 |         |         |            |        |
|-------------------------------------------------|---------|---------|------------|--------|
| Tetrahydrouridine                               | 0.31941 | -1.6465 | 0.0022519  | 2.6474 |
| 4,10-Undecadiynal                               | 0.32785 | -1.6089 | 0.0014915  | 2.8264 |
| Methylphenidate                                 | 0.33208 | -1.5904 | 0.00014496 | 3.8387 |
| meprobamate                                     | 0.33289 | -1.5869 | 0.00032404 | 3.4894 |
| S-Aminoethyl-L-cysteine                         | 0.33747 | -1.5672 | 0.027284   | 1.5641 |
| ser-gln                                         | 0.33968 | -1.5577 | 2.62E-05   | 4.5816 |
| Phenylalanylglycine                             | 0.35301 | -1.5022 | 0.00027616 | 3.5588 |
| Gly-Phe                                         | 0.35318 | -1.5015 | 0.0013385  | 2.8734 |
| UAMC-3203                                       | 0.36191 | -1.4663 | 0.00066457 | 3.1775 |
| Gibberellin A12 aldehyde                        | 0.36959 | -1.436  | 0.00035791 | 3.4462 |
| Lacinilene C 7-methyl ether                     | 0.37256 | -1.4244 | 0.0033334  | 2.4771 |
| P505-15                                         | 0.37541 | -1.4135 | 0.0090694  | 2.0424 |
| ALA-PRO                                         | 0.37792 | -1.4038 | 0.00058306 | 3.2343 |
| Glycine                                         | 0.37859 | -1.4013 | 0.0046223  | 2.3351 |
| N-Acetyl-D-alloisoleucine                       | 0.38033 | -1.3947 | 0.0022216  | 2.6533 |
| methocarbamol                                   | 0.38241 | -1.3868 | 0.008678   | 2.0616 |
| Dodecanedioic acid                              | 0.38657 | -1.3712 | 0.02033    | 1.6919 |
| Desthiobiotin                                   | 0.39559 | -1.3379 | 0.00027421 | 3.5619 |
| EDDA                                            | 0.40463 | -1.3053 | 6.31E-05   | 4.2001 |
| 4-guanidinobutanal                              | 0.40551 | -1.3022 | 0.017318   | 1.7615 |
| Acetylcarnitine                                 | 0.40621 | -1.2997 | 0.00018805 | 3.7257 |
| Glycerol 3-phosphate                            | 0.40801 | -1.2933 | 0.021303   | 1.6716 |
| Rimantadine                                     | 0.40813 | -1.2929 | 5.13E-05   | 4.2901 |
| N-Acetyl-L-glutamine                            | 0.40822 | -1.2926 | 0.013505   | 1.8695 |
| Lanost-8-ene-2,3,12,21,24,25-hexol              | 0.40848 | -1.2917 | 0.0052515  | 2.2797 |
| 2-[(9Z)-9-Nonadecenoylamino]ethanesulfonic acid | 0.41134 | -1.2816 | 0.0032107  | 2.4934 |
| pro-his                                         | 0.41388 | -1.2727 | 0.00099008 | 3.0043 |
| (+/-)-9-HpODE                                   | 0.41573 | -1.2663 | 0.0016992  | 2.7698 |
| N-Undecanoylglycine                             | 0.41881 | -1.2556 | 0.040219   | 1.3956 |
| Ser-Ser                                         | 0.41884 | -1.2555 | 0.00028616 | 3.5434 |
| Val-Leu                                         | 0.42057 | -1.2496 | 0.00042156 | 3.3751 |
| YYA-021                                         | 0.4274  | -1.2263 | 0.0075828  | 2.1202 |
| Ethyl docosaehaenoate                           | 0.43076 | -1.215  | 0.0015293  | 2.8155 |
| Leucylproline                                   | 0.43408 | -1.204  | 9.99E-05   | 4.0003 |
| Ser-Glu                                         | 0.43679 | -1.195  | 1.28E-05   | 4.8933 |
| (+)-castanospermine                             | 0.44172 | -1.1788 | 0.0022448  | 2.6488 |
| Valylproline                                    | 0.44802 | -1.1584 | 0.0014898  | 2.8269 |
| Phenylisocyanate                                | 0.45085 | -1.1493 | 0.016183   | 1.7909 |
| deaminoneuraminic acid                          | 0.45182 | -1.1462 | 0.0080747  | 2.0929 |
| Valylvaline                                     | 0.453   | -1.1424 | 0.0018513  | 2.7325 |
| Gly-l-pro                                       | 0.45921 | -1.1228 | 0.001736   | 2.7604 |
| AMPA                                            | 0.46505 | -1.1045 | 0.030987   | 1.5088 |
| Glycylglutamine                                 | 0.46505 | -1.1045 | 0.030987   | 1.5088 |
| gamma-Glu-gln                                   | 0.46872 | -1.0932 | 0.0060277  | 2.2198 |
| HEPES                                           | 0.47335 | -1.079  | 0.0015211  | 2.8179 |
| Pro-Lys                                         | 0.47952 | -1.0603 | 0.00047904 | 3.3196 |

|                                                                                                                |         |         |            |        |
|----------------------------------------------------------------------------------------------------------------|---------|---------|------------|--------|
| PKF118-310                                                                                                     | 0.48    | -1.0589 | 0.021656   | 1.6644 |
| DL-Glutamine                                                                                                   | 0.48034 | -1.0579 | 0.00029182 | 3.5349 |
| 4-Aminobenzoic acid                                                                                            | 0.48063 | -1.057  | 0.014296   | 1.8448 |
| Methionylleucine                                                                                               | 0.48359 | -1.0481 | 0.02574    | 1.5894 |
| Eldecalcitol                                                                                                   | 0.48788 | -1.0354 | 0.037663   | 1.4241 |
| EPK                                                                                                            | 0.48924 | -1.0314 | 2.69E-05   | 4.5705 |
| Gly-Lys                                                                                                        | 0.48931 | -1.0312 | 0.01556    | 1.808  |
| 2-(3,4-Dihydroxyphenyl)-8-(beta-D-threo-hexopyranosyloxy)-5,7-dihydroxy-4-oxo-4H-chromen-3-yl hydrogen sulfate | 0.49347 | -1.019  | 0.048578   | 1.3136 |
| N-[(3-Hydroxy-4,7,7-trimethylbicyclo[2.2.1]hept-2-yl)carbamoyl]-4-methylbenzenesulfonamide                     | 0.49386 | -1.0178 | 0.014335   | 1.8436 |
| PFUnDA                                                                                                         | 0.49492 | -1.0147 | 0.015565   | 1.8079 |
| <b>Higher</b>                                                                                                  |         |         |            |        |
| .                                                                                                              | 2.0329  | 1.0236  | 0.0047607  | 2.3223 |
| shrimp shell                                                                                                   | 2.0559  | 1.0398  | 0.0003514  | 3.4542 |
| 5-Methyl-1-(1,3,5-trimethyl-1H-pyrazol-4-yl)-1H-1,2,3-triazole                                                 | 2.0614  | 1.0436  | 0.0056697  | 2.2464 |
| ML-236C                                                                                                        | 2.0692  | 1.0491  | 0.033437   | 1.4758 |
| 9-Phenylnonanoic acid                                                                                          | 2.0822  | 1.0581  | 0.0098593  | 2.0062 |
| DL-Mandelic acid                                                                                               | 2.0829  | 1.0586  | 0.012684   | 1.8968 |
| Guaifenesin                                                                                                    | 2.0989  | 1.0696  | 0.015754   | 1.8026 |
| (11Z)-eicoseneoylcarnitine                                                                                     | 2.0996  | 1.0701  | 0.041975   | 1.377  |
| Prostaglandin F1 Alcohol                                                                                       | 2.1015  | 1.0714  | 0.012072   | 1.9182 |
| Tauropine                                                                                                      | 2.1305  | 1.0912  | 0.016397   | 1.7852 |
| dacisteine                                                                                                     | 2.1343  | 1.0938  | 0.0063144  | 2.1997 |
| glutaral                                                                                                       | 2.1406  | 1.098   | 0.01449    | 1.8389 |
| Formiminoglutamic Acid                                                                                         | 2.1903  | 1.1311  | 0.032321   | 1.4905 |
| 4-Hydroxynonenal                                                                                               | 2.2045  | 1.1404  | 0.014487   | 1.839  |
| 7-hydroxy Pestalotin                                                                                           | 2.2252  | 1.1539  | 6.13E-05   | 4.2127 |
| Acetyl-L-carnitine                                                                                             | 2.2328  | 1.1589  | 0.020751   | 1.683  |
| C2 Dihydroceramide                                                                                             | 2.235   | 1.1603  | 0.00030488 | 3.5159 |
| Zolmitriptan                                                                                                   | 2.2442  | 1.1662  | 0.036964   | 1.4322 |
| Nicotinyl methylamide                                                                                          | 2.3014  | 1.2025  | 0.00092897 | 3.032  |
| 13(S)-HOTrE                                                                                                    | 2.3016  | 1.2026  | 0.043142   | 1.3651 |
| 3-Hydroxybutyric acid                                                                                          | 2.3326  | 1.2219  | 0.0036976  | 2.4321 |
| Ethyl sulfate                                                                                                  | 2.3476  | 1.2312  | 0.026543   | 1.5761 |
| Idrocilamide                                                                                                   | 2.3489  | 1.232   | 0.0022937  | 2.6395 |
| DOG                                                                                                            | 2.3518  | 1.2338  | 0.0015267  | 2.8162 |
| bhas#24                                                                                                        | 2.4055  | 1.2663  | 0.022517   | 1.6475 |
| Saccharin                                                                                                      | 2.4269  | 1.2791  | 0.0041211  | 2.385  |
| (11Z,14Z)-eicosadienoylcarnitine                                                                               | 2.4531  | 1.2946  | 0.0033275  | 2.4779 |
| MFCD08277025                                                                                                   | 2.4569  | 1.2968  | 0.029725   | 1.5269 |
| [Similar to: 17-AAG; _Mass: -2.0472 Da]                                                                        | 2.4866  | 1.3142  | 0.011474   | 1.9403 |
| 2-(((2S,3R)-2-Methyl-3-pentadecyl-2-oxiranyl)carbonyl)amino)propyl acetate                                     | 2.5229  | 1.3351  | 0.018922   | 1.723  |

|                                                                                                                                                   |        |        |            |        |
|---------------------------------------------------------------------------------------------------------------------------------------------------|--------|--------|------------|--------|
| 6beta-(Dimethylamino)-3beta,5-dihydroxy-5alpha-pregnan-20-one                                                                                     | 2.5466 | 1.3486 | 0.014183   | 1.8482 |
| (S)-N-Boc-L-homoserine ethyl ester                                                                                                                | 2.5662 | 1.3597 | 0.0035054  | 2.4553 |
| Fesoterodine                                                                                                                                      | 2.6145 | 1.3865 | 0.0097098  | 2.0128 |
| 4149853                                                                                                                                           | 2.6191 | 1.3891 | 0.039759   | 1.4006 |
| MFCD22416941                                                                                                                                      | 2.6342 | 1.3973 | 0.01032    | 1.9863 |
| (2E)-hexadecenoylcarnitine                                                                                                                        | 2.6379 | 1.3994 | 0.024175   | 1.6166 |
| Pirimicarb                                                                                                                                        | 2.6407 | 1.4009 | 0.018743   | 1.7272 |
| Lumula                                                                                                                                            | 2.6711 | 1.4174 | 0.010546   | 1.9769 |
| 7309670                                                                                                                                           | 2.6902 | 1.4277 | 0.0053487  | 2.2717 |
| [Similar to: 2-benzylideneindan-1-one; _Mass: 60.0998 Da]                                                                                         | 2.7152 | 1.4411 | 0.0015824  | 2.8007 |
| C6 ceramide                                                                                                                                       | 2.7257 | 1.4466 | 3.27E-05   | 4.4856 |
| Atagabalin                                                                                                                                        | 2.7303 | 1.4491 | 0.0063632  | 2.1963 |
| 5-Octyl D-glutamate                                                                                                                               | 2.8141 | 1.4927 | 0.020602   | 1.6861 |
| CERAMIDE 4                                                                                                                                        | 2.8454 | 1.5086 | 0.00049041 | 3.3094 |
| (5S,9R)-12-[(2R)-6-Hydroxy-2,5,7,8-tetramethyl-3,4-dihydro-2H-chromen-2-yl]-5,9-dimethyldodecanoic acid                                           | 2.8501 | 1.511  | 0.0042721  | 2.3694 |
| N-Palmitoyl-L-methionine                                                                                                                          | 2.881  | 1.5266 | 0.0011582  | 2.9362 |
| N-Butyl-1H-pyrazolo[3,4-d]pyrimidin-4-amine                                                                                                       | 2.9437 | 1.5576 | 0.010568   | 1.976  |
| C2-ceramide                                                                                                                                       | 2.9467 | 1.5591 | 0.00042046 | 3.3763 |
| 625                                                                                                                                               | 3.0295 | 1.5991 | 0.0011364  | 2.9445 |
| (2E)-N-[(3S)-2-Oxotetrahydro-3-furanyl]-2-dodecenamide                                                                                            | 3.0489 | 1.6083 | 0.036512   | 1.4376 |
| L-Propargylglycine                                                                                                                                | 3.0529 | 1.6102 | 0.038065   | 1.4195 |
| [Similar to: 2-benzylideneindan-1-one; _Mass: 174.8359 Da]                                                                                        | 3.0682 | 1.6174 | 0.025036   | 1.6014 |
| N-[(4Z,7Z,10Z,13Z,16Z,19Z)-docosahexaenoyl]-L-glutamic acid                                                                                       | 3.0792 | 1.6226 | 0.012576   | 1.9005 |
| Nikethamide                                                                                                                                       | 3.1083 | 1.6361 | 0.0022363  | 2.6505 |
| asn-arg                                                                                                                                           | 3.1121 | 1.6379 | 0.00011809 | 3.9278 |
| (2a'R,3R,3'R,5R,5'R,6a'S,9a'R)-5-(3-Furyl)-3'-hydroxy-9a'-(hydroxymethyl)-5'-methyloctahydro-3'H,6a'H-spiro[furan-3,6'-naphtho[1,8a-b]oxet]-2-one | 3.2534 | 1.7019 | 0.048492   | 1.3143 |
| Medrogestone                                                                                                                                      | 3.2605 | 1.7051 | 8.72E-05   | 4.0593 |
| Crotanecine                                                                                                                                       | 3.3064 | 1.7252 | 0.0234     | 1.6308 |
| 3-Methylazelaic acid                                                                                                                              | 3.4129 | 1.771  | 0.01979    | 1.7036 |
| Palmitoylcarnitine                                                                                                                                | 3.4325 | 1.7793 | 0.0016543  | 2.7814 |
| 8-{3-[(2E)-1-Hydroxy-2-octen-1-yl]-2-oxiranyl}octanoic acid                                                                                       | 3.4424 | 1.7834 | 0.0035375  | 2.4513 |
| 3-Hydroxysebacic acid                                                                                                                             | 3.5303 | 1.8198 | 0.0049285  | 2.3073 |
| talernol                                                                                                                                          | 3.6109 | 1.8524 | 0.04301    | 1.3664 |
| Hydroxypropionylcarnitine                                                                                                                         | 3.6253 | 1.8581 | 0.00043259 | 3.3639 |
| methyl-2-pyrimidinepropanoic acid                                                                                                                 | 3.7562 | 1.9093 | 0.015877   | 1.7992 |



|                                                                                                                                                                  |        |        |            |        |
|------------------------------------------------------------------------------------------------------------------------------------------------------------------|--------|--------|------------|--------|
| (2R)-3-[(Hydroxy{[(2S,3R,5S,6S)-3,4,5-trihydroxy-2,6-bis(alpha-D-mannopyranosyloxy)cyclohexyl]oxy}phosphoryl)oxy]-2-[(9Z)-9-octadecenoyloxy]propyl nonadecanoate | 3.7985 | 1.9254 | 0.041136   | 1.3858 |
| 3-Hydroxy-N-[(3S)-2-oxotetrahydro-3-furanyl]octanamide                                                                                                           | 3.8125 | 1.9307 | 2.69E-05   | 4.5707 |
| N1-(1,3,5-Trimethyl-1H-pyrazol-4-yl)-2-cyano-3-(dimethylamino)acrylamide                                                                                         | 3.8173 | 1.9325 | 0.00040707 | 3.3903 |
| (+)-Australine                                                                                                                                                   | 3.8285 | 1.9368 | 0.0079083  | 2.1019 |
| Taurocholic Acid 3-sulfate                                                                                                                                       | 3.8499 | 1.9448 | 0.0013549  | 2.8681 |
| Biotin-azide                                                                                                                                                     | 4.2303 | 2.0808 | 0.00039168 | 3.4071 |
| (1S,4S,4aR,8aS)-4-[(3S)-3-Hydroxy-3-methyl-4-penten-1-yl]-4a,8,8-trimethyl-3-methylenedecahydro-1-naphthalenyl acetate                                           | 4.2674 | 2.0934 | 5.09E-07   | 6.293  |
| [Similar to: 2-benzylideneindan-1-one; _Mass: 4.0749 Da]                                                                                                         | 4.2779 | 2.0969 | 4.10E-05   | 4.3868 |
| 2-Aminoethyl (2S,3R,4E,6E)-3-hydroxy-2-[(2-hydroxyoctadecanoyl)amino]-4,6-pentadecadien-1-yl hydrogen phosphate                                                  | 4.288  | 2.1003 | 0.039138   | 1.4074 |
| (9Z,12Z,15Z)-3-hydroxyoctadecatrienoylcarnitine                                                                                                                  | 4.5284 | 2.179  | 0.025658   | 1.5908 |
| Isococculidine                                                                                                                                                   | 4.7683 | 2.2535 | 9.83E-05   | 4.0073 |
| Heptadecanoic Acid                                                                                                                                               | 4.7736 | 2.2551 | 3.43E-05   | 4.4647 |
| 2'-Deoxyinosine                                                                                                                                                  | 4.8061 | 2.2649 | 1.96E-05   | 4.708  |
| EN0350000                                                                                                                                                        | 5.2879 | 2.4027 | 0.0049175  | 2.3083 |
| Dobutamine                                                                                                                                                       | 5.3549 | 2.4209 | 0.0017343  | 2.7609 |
| Isoprenaline                                                                                                                                                     | 6.0931 | 2.6072 | 1.16E-05   | 4.9342 |
| Pheneturide                                                                                                                                                      | 6.1299 | 2.6159 | 0.0081558  | 2.0885 |
| Xanthurenic acid                                                                                                                                                 | 6.3046 | 2.6564 | 0.00039193 | 3.4068 |
| Propionylcarnitine                                                                                                                                               | 6.3256 | 2.6612 | 0.00022785 | 3.6424 |
| N-(2-Cyanoethyl)-L-glutamine                                                                                                                                     | 8.5683 | 3.099  | 0.0040603  | 2.3914 |

**Table S5.** Untargeted metabolomic analysis in liver tissue of mice exposed to polystyrene (2mg/week);  $p = 0.05$ . Data can be found in supplemental Excel Table S5.

**Table S6.**

| Untargeted Metabolomic Analysis in Liver Tissue of Mice Exposed to Polystyrene (4mg/week) p = 0.05                   | FC      | log2(FC) | raw.pval       | -LOG10(p) |
|----------------------------------------------------------------------------------------------------------------------|---------|----------|----------------|-----------|
| <b>Lower</b>                                                                                                         |         |          |                |           |
| DL-2,6-Diaminopimelic acid                                                                                           | 0.26133 | -1.936   | 0.0015852      | 2.7999    |
| pro-trp                                                                                                              | 0.28358 | -1.8182  | 0.0010486      | 2.9794    |
| pro-met                                                                                                              | 0.30892 | -1.6947  | 0.013482       | 1.8703    |
| 2-methylcitric acid                                                                                                  | 0.32055 | -1.6414  | 0.043605       | 1.3605    |
| Aceglutamide                                                                                                         | 0.32914 | -1.6032  | 0.021286       | 1.6719    |
| 2-[2-oxo-2-(pyridin-3-ylamino)ethoxy]acetic acid                                                                     | 0.34693 | -1.5273  | 0.015856       | 1.7998    |
| 5,6-Dihydroxy-3-methyl-2(1H)-quinolinone                                                                             | 0.37386 | -1.4194  | 0.014026       | 1.8531    |
| (8Z,11Z,14Z)-Heptadecatrienal                                                                                        | 0.37674 | -1.4084  | 0.034502       | 1.4622    |
| meprobamate                                                                                                          | 0.38727 | -1.3686  | 0.0058311      | 2.2342    |
| (2S,3R,5S)-3-(2-Aminoethyl)-7-oxo-4-oxa-1-azabicyclo[3.2.0]heptane-2-carboxylic acid                                 | 0.40367 | -1.3088  | 0.0018036      | 2.7439    |
| PESTALOTIN                                                                                                           | 0.40632 | -1.2993  | 0.0094446      | 2.0248    |
| N-acetyl-beta-D-glucosaminyllamine                                                                                   | 0.41155 | -1.2809  | 0.0042603      | 2.3706    |
| MFCD00025555                                                                                                         | 0.41371 | -1.2733  | 0.001205       | 2.919     |
| PKF118-310                                                                                                           | 0.42604 | -1.231   | 0.0094004      | 2.0269    |
| Threonylglutamine                                                                                                    | 0.43955 | -1.1859  | 0.0023435      | 2.6301    |
| Ectoine                                                                                                              | 0.44391 | -1.1717  | 0.0035884      | 2.4451    |
| methocarbamol                                                                                                        | 0.44418 | -1.1708  | 0.00763        | 2.1175    |
| UAMC-3203                                                                                                            | 0.44539 | -1.1668  | 0.0008196<br>6 | 3.0864    |
| thr-arg                                                                                                              | 0.44598 | -1.165   | 0.0072448      | 2.14      |
| Glycylnorvaline                                                                                                      | 0.44703 | -1.1616  | 0.0037748      | 2.4231    |
| Lacinilene C 7-methyl ether                                                                                          | 0.4502  | -1.1514  | 0.016636       | 1.7789    |
| N-Acetyl-D-alloisoleucine                                                                                            | 0.45347 | -1.1409  | 0.004781       | 2.3205    |
| [Similar to: Xanthosine; _Mass: 35.9766 Da]                                                                          | 0.4561  | -1.1326  | 0.0044703      | 2.3497    |
| ALA-GLU                                                                                                              | 0.45634 | -1.1318  | 0.030628       | 1.5139    |
| ser-arg                                                                                                              | 0.45946 | -1.122   | 0.0048375      | 2.3154    |
| (15Z,19R)-25-Amino-22-hydroxy-22-oxido-17,21,23-trioxa-22lambda~5~-phosphapentacos-15-en-19-yl (9Z)-9-pentadecenoate | 0.46003 | -1.1202  | 0.013034       | 1.8849    |
| LysoPC(22:5(7Z,10Z,13Z,16Z,19Z))                                                                                     | 0.46142 | -1.1158  | 0.017241       | 1.7634    |
| N-Acetyl-L-glutamine                                                                                                 | 0.46587 | -1.102   | 0.041515       | 1.3818    |
| pro-his                                                                                                              | 0.4766  | -1.0692  | 0.010863       | 1.9641    |
| Physovenine                                                                                                          | 0.48115 | -1.0554  | 0.031185       | 1.5061    |
| ser-gln                                                                                                              | 0.48451 | -1.0454  | 0.0005229<br>5 | 3.2815    |
| Leucylproline                                                                                                        | 0.49518 | -1.014   | 0.0002496<br>9 | 3.6026    |
| <b>Higher</b>                                                                                                        |         |          |                |           |
| Idrocilamide                                                                                                         | 2.0058  | 1.0042   | 0.0092144      | 2.0355    |
| 7309670                                                                                                              | 2.01    | 1.0072   | 0.031327       | 1.5041    |

|                                                                                                                 |        |        |                |        |
|-----------------------------------------------------------------------------------------------------------------|--------|--------|----------------|--------|
| 2-Aminoethyl (2S,3R,4E,6E)-3-hydroxy-2-[(2-hydroxyoctadecanoyl)amino]-4,6-pentadecadien-1-yl hydrogen phosphate | 2.16   | 1.111  | 0.039314       | 1.4055 |
| {[5-[(2S)-2-Carboxy-2-(trimethylammonio)ethyl]-1H-imidazol-2-yl]sulfanyl}oxidanide                              | 2.2238 | 1.153  | 0.0003359<br>1 | 3.4738 |
| 3-Hydroxybutyric acid                                                                                           | 2.2579 | 1.175  | 0.015536       | 1.8087 |
| 2-Hydroxy-3-oxobutyl phosphate                                                                                  | 2.6437 | 1.4026 | 0.033967       | 1.4689 |
| methyl-2-pyrimidinepropanoic acid                                                                               | 2.6815 | 1.423  | 0.035126       | 1.4544 |
| [Similar to: 2-benzylideneindan-1-one; _Mass: 4.0749 Da]                                                        | 2.7045 | 1.4354 | 0.0035123      | 2.4544 |
| N1-(1,3,5-Trimethyl-1H-pyrazol-4-yl)-2-cyano-3-(dimethylamino)acrylamide                                        | 2.7942 | 1.4824 | 0.034564       | 1.4614 |
| Glyparamide                                                                                                     | 2.8295 | 1.5006 | 0.030294       | 1.5187 |
| Heptadecanoic Acid                                                                                              | 2.9187 | 1.5453 | 0.0018483      | 2.7332 |
| Propionylcarnitine                                                                                              | 3.0271 | 1.5979 | 0.0030375      | 2.5175 |
| (5S,9R)-12-[(2R)-6-Hydroxy-2,5,7,8-tetramethyl-3,4-dihydro-2H-chromen-2-yl]-5,9-dimethyldodecanoic acid         | 3.0475 | 1.6076 | 0.012462       | 1.9044 |
| 625                                                                                                             | 3.0902 | 1.6277 | 0.01578        | 1.8019 |
| N-[(4Z,7Z,10Z,13Z,16Z,19Z)-docosahexaenoyl]-L-glutamic acid                                                     | 3.1346 | 1.6483 | 0.033176       | 1.4792 |
| trimethadione                                                                                                   | 3.3756 | 1.7551 | 0.047143       | 1.3266 |
| .alpha.-Aminoadipic acid                                                                                        | 3.5751 | 1.838  | 0.03421        | 1.4658 |
| C8-HSL                                                                                                          | 3.5762 | 1.8384 | 0.030898       | 1.5101 |
| g-Glutamylcysteine                                                                                              | 3.7182 | 1.8946 | 0.02835        | 1.5474 |
| _Glutamylcysteine                                                                                               | 3.7317 | 1.8998 | 0.010297       | 1.9873 |
| [Similar to: 17-AAG; _Mass: -2.0472 Da]                                                                         | 3.732  | 1.8999 | 0.039677       | 1.4015 |
| N-(2-Cyanoethyl)-L-glutamine                                                                                    | 3.8174 | 1.9326 | 0.020004       | 1.6989 |
| 2-Aminoadipic acid                                                                                              | 3.9862 | 1.995  | 0.022671       | 1.6445 |
| 6-Oxo-pipecolinic acid                                                                                          | 4.2361 | 2.0827 | 0.014026       | 1.8531 |
| 4-Pyridoxic acid                                                                                                | 4.2507 | 2.0877 | 0.013754       | 1.8616 |
|                                                                                                                 |        |        | 0.0002200      |        |
| Biotin-azide                                                                                                    | 4.4478 | 2.1531 | 4              | 3.6575 |
| Taurocholic Acid 3-sulfate                                                                                      | 7.0675 | 2.8212 | 0.018604       | 1.7304 |

**Table S6.** Untargeted metabolomic analysis in liver tissue of mice exposed to polystyrene (4mg/week);  $p = 0.05$ . Data can be found in supplemental Excel Table S6.

**Table S7.**

| <b>Untargeted Metabolomic Analysis in Liver Tissue of Mice Exposed to Mixed Polymer (2mg/week) p = 0.05</b> | <b>FC</b> | <b>log2(FC)</b> | <b>raw.pval</b> | <b>-LOG10(p)</b> |
|-------------------------------------------------------------------------------------------------------------|-----------|-----------------|-----------------|------------------|
| <b>Lower</b>                                                                                                |           |                 |                 |                  |
| Palmitonitrile                                                                                              | 0.021396  | -5.5465         | 0.0030121       | 2.5211           |
| 3-Nonyl-1H-pyrazole                                                                                         | 0.10022   | -3.3187         | 0.01055         | 1.9767           |
| 2-Amino-1,3,4-octadecanetriol                                                                               | 0.1105    | -3.1779         | 0.0035181       | 2.4537           |
| Cinnassiol C3                                                                                               | 0.11617   | -3.1057         | 0.0026471       | 2.5772           |
| Arachidoyl Ethanolamide                                                                                     | 0.12978   | -2.9459         | 0.0078264       | 2.1064           |
| NP-019401                                                                                                   | 0.14679   | -2.7682         | 0.0060957       | 2.215            |
| sphinganine                                                                                                 | 0.21485   | -2.2186         | 0.0021704       | 2.6635           |
| (E)-9-Isopropyl-6-methyl-5,9-decadiene-2-one                                                                | 0.22925   | -2.125          | 0.0012675       | 2.8971           |
| Tridemorph                                                                                                  | 0.24417   | -2.0341         | 0.049473        | 1.3056           |
| C20 sphinganine                                                                                             | 0.24417   | -2.0341         | 0.049473        | 1.3056           |
| FF-MAS                                                                                                      | 0.25584   | -1.9667         | 0.001591        | 2.7983           |
| RG3715000                                                                                                   | 0.25658   | -1.9625         | 0.018146        | 1.7412           |
| Solacapine                                                                                                  | 0.25965   | -1.9453         | 0.01571         | 1.8038           |
| 1-Oxo-1H-isochromene-3-carbaldehyde                                                                         | 0.26269   | -1.9285         | 0.0046897       | 2.3289           |
| 2444643W XK                                                                                                 | 0.27402   | -1.8676         | 0.0085275       | 2.0692           |
| Phlegmarine                                                                                                 | 0.279     | -1.8417         | 0.00095641      | 3.0194           |
| 7-ketodeoxycholic acid                                                                                      | 0.30457   | -1.7151         | 0.048309        | 1.316            |
| 6-(Methylthio)purine                                                                                        | 0.30839   | -1.6972         | 0.0020384       | 2.6907           |
| phomalactone                                                                                                | 0.32206   | -1.6346         | 0.049065        | 1.3092           |
| L-Aspartic acid                                                                                             | 0.3224    | -1.6331         | 0.018845        | 1.7248           |
| Serratanidine                                                                                               | 0.3252    | -1.6206         | 0.0045603       | 2.341            |
| Gabapentin related compound E                                                                               | 0.33726   | -1.5681         | 0.0030868       | 2.5105           |
| 8-[(3,3-Dimethyl-2-oxiranyl)methyl]-7-methoxy-2H-chromen-2-one                                              | 0.34118   | -1.5514         | 0.047497        | 1.3233           |
| N-[(9Z)-3-Hydroxy-9-octadecenoyl]glycine                                                                    | 0.36635   | -1.4487         | 0.0018601       | 2.7305           |
| Ergosterol                                                                                                  | 0.37159   | -1.4282         | 0.0027581       | 2.5594           |
| Dichloroacetic acid                                                                                         | 0.38258   | -1.3862         | 0.0029536       | 2.5296           |
| spisulosine                                                                                                 | 0.39101   | -1.3547         | 0.0022003       | 2.6575           |
| Diglyme                                                                                                     | 0.39443   | -1.3422         | 0.0036312       | 2.44             |
| 3222                                                                                                        | 0.39667   | -1.334          | 0.047353        | 1.3246           |
| N-tetradecanoyl-4-hydroxysphinganine                                                                        | 0.40625   | -1.2996         | 0.0021039       | 2.677            |
| Thalictroidine                                                                                              | 0.41129   | -1.2818         | 0.0025662       | 2.5907           |
| Lauramide                                                                                                   | 0.41128   | -1.2818         | 0.0039111       | 2.4077           |
| Camylofin                                                                                                   | 0.41557   | -1.2668         | 0.011212        | 1.9503           |
| 1,2-Cyclohexanediol                                                                                         | 0.42247   | -1.2431         | 0.0065401       | 2.1844           |
| Glutaryl carnitine                                                                                          | 0.42568   | -1.2322         | 0.0018071       | 2.743            |
| all-trans-7-hydroxyhexadeca-2,4,8,10-tetraenoic acid                                                        | 0.43437   | -1.203          | 0.01017         | 1.9927           |
| MFC00674434                                                                                                 | 0.45938   | -1.1223         | 0.043783        | 1.3587           |
| Valpromide                                                                                                  | 0.46996   | -1.0894         | 0.0064414       | 2.191            |

|                                                                                                 |         |         |            |        |
|-------------------------------------------------------------------------------------------------|---------|---------|------------|--------|
| (2E)-2-Octenal                                                                                  | 0.46996 | -1.0894 | 0.0064414  | 2.191  |
| Myristoleyl alcohol                                                                             | 0.4744  | -1.0758 | 0.0044952  | 2.3473 |
| 17-amino-5 $\beta$ -androstan-11-ol                                                             | 0.47514 | -1.0736 | 0.0030353  | 2.5178 |
| Tapentadol                                                                                      | 0.47523 | -1.0733 | 0.00060202 | 3.2204 |
| Capsi-amide                                                                                     | 0.47963 | -1.06   | 0.0075999  | 2.1192 |
| Sphingosine (d18:1(14Z))                                                                        | 0.48411 | -1.0466 | 0.045884   | 1.3383 |
| MFCD00002821                                                                                    | 0.48411 | -1.0466 | 0.045884   | 1.3383 |
| 2-[4-(3-Hydroxypropyl)-2-methoxyphenoxy]-1,3-propanediol                                        | 0.48477 | -1.0446 | 0.003224   | 2.4916 |
| Methyl (11E)-8-hydroxy-11,17-octadecadien-9-ynoate                                              | 0.48629 | -1.0401 | 0.027321   | 1.5635 |
| 1-Phenethyl-4-piperidone                                                                        | 0.48799 | -1.0351 | 0.0014345  | 2.8433 |
| N-(9-oxodecyl)acetamide                                                                         | 0.48799 | -1.0351 | 0.0014345  | 2.8433 |
| O-adipoylcarnitine                                                                              | 0.49934 | -1.0019 | 0.02783    | 1.5555 |
| <b>Higher</b>                                                                                   |         |         |            |        |
| RG5927903                                                                                       | 2.0069  | 1.0049  | 0.013412   | 1.8725 |
| 13-deoxytedanolide                                                                              | 2.0592  | 1.0421  | 0.0088788  | 2.0516 |
| N-methylmorphinan                                                                               | 2.0742  | 1.0525  | 0.0053266  | 2.2735 |
| Panthenol                                                                                       | 2.0855  | 1.0604  | 0.012243   | 1.9121 |
| [Similar to: 7-Oxobenz[de]anthracene; _Mass: -7.9880 Da]                                        | 2.1012  | 1.0712  | 0.031935   | 1.4957 |
| Gly-Ile                                                                                         | 2.1456  | 1.1014  | 0.024153   | 1.617  |
| PCHP                                                                                            | 2.1477  | 1.1028  | 0.0051854  | 2.2852 |
| Oxohongdenafil                                                                                  | 2.1801  | 1.1244  | 0.0043332  | 2.3632 |
| (9S,12R)-9,12-Dihydroxy-10-hexadecynoic acid                                                    | 2.1894  | 1.1306  | 0.0078527  | 2.105  |
| 3-Methylundecanoic acid                                                                         | 2.1976  | 1.1359  | 0.010272   | 1.9883 |
| (9Z)-N-[(2S,3R,4E,6E)-1,3-Dihydroxy-4,6-tetradecadien-2-yl]-2-hydroxy-9-octadecenamamide        | 2.2041  | 1.1402  | 0.010636   | 1.9732 |
| PEG n15                                                                                         | 2.2121  | 1.1454  | 0.009133   | 2.0394 |
| N <sup>6</sup> -Tetradecanoyl-L-lysine                                                          | 2.2206  | 1.1509  | 0.03223    | 1.4917 |
| Netilmicin                                                                                      | 2.231   | 1.1577  | 0.005635   | 2.2491 |
| Succinic acid                                                                                   | 2.2491  | 1.1694  | 0.00081137 | 3.0908 |
| NP-017710                                                                                       | 2.2752  | 1.186   | 0.0096522  | 2.0154 |
| PEG n16                                                                                         | 2.2974  | 1.2     | 0.0068627  | 2.1635 |
| Nifenazone                                                                                      | 2.3244  | 1.2169  | 0.0073105  | 2.1361 |
| Diacetoxyscirpenol                                                                              | 2.3673  | 1.2432  | 0.0070996  | 2.1488 |
| (1S,4R,7S,9R)-9-Methyl-8-azatetracyclo[5.5.3.0 <sup>1,8</sup> .0 <sup>4,9</sup> ]pentadec-5-ene | 2.3826  | 1.2525  | 0.0049059  | 2.3093 |
| PEG n13                                                                                         | 2.3902  | 1.2571  | 0.0052044  | 2.2836 |
| PEG n12                                                                                         | 2.4062  | 1.2667  | 0.0050144  | 2.2998 |
| Microcystin-LA                                                                                  | 2.4757  | 1.3079  | 0.0039341  | 2.4052 |
| PEG n14                                                                                         | 2.4792  | 1.3099  | 0.0046633  | 2.3313 |
| 1-(2-Phenyl-2-propanyl)piperidine                                                               | 2.4902  | 1.3163  | 0.0050035  | 2.3007 |

|                                                                                                                                                               |        |        |           |        |
|---------------------------------------------------------------------------------------------------------------------------------------------------------------|--------|--------|-----------|--------|
| nicosulfuron [ANSI]                                                                                                                                           | 2.4971 | 1.3202 | 0.0037391 | 2.4272 |
| Imatinib                                                                                                                                                      | 2.5825 | 1.3687 | 0.0043963 | 2.3569 |
| miglustat                                                                                                                                                     | 2.5907 | 1.3734 | 0.0024378 | 2.613  |
| capuride                                                                                                                                                      | 2.5973 | 1.377  | 0.045614  | 1.3409 |
| NP-014287                                                                                                                                                     | 2.6117 | 1.385  | 0.027934  | 1.5539 |
| {{(3R,4S)-1-(Phenylacetyl)-3-[2-(4-phenyl-1-piperazinyl)ethyl]-4-piperidinyl}acetic acid                                                                      | 2.638  | 1.3994 | 0.004281  | 2.3685 |
| Cassaidine                                                                                                                                                    | 2.6461 | 1.4039 | 0.0055312 | 2.2572 |
| O-pentadecanoylcarnitine                                                                                                                                      | 2.6461 | 1.4039 | 0.0055312 | 2.2572 |
| Arachidonoyl ethanolamide phosphate                                                                                                                           | 2.6489 | 1.4054 | 0.0044945 | 2.3473 |
| (1R,9S)-11-(1-Acetyl-4-piperidinyl)-5-(2-methylphenyl)-7,11-diazatricyclo[7.3.1.0 <sub>2,7</sub> ]trideca-2,4-dien-6-one                                      | 2.6638 | 1.4135 | 0.0047276 | 2.3254 |
| 2-(4,4-diphenyl-1-piperidinobuta-1,3-dienyl)phenyl acetate                                                                                                    | 2.719  | 1.4431 | 0.0038723 | 2.412  |
| Tropicamide                                                                                                                                                   | 3.5057 | 1.8097 | 0.012837  | 1.8915 |
| Nicotinuric acid                                                                                                                                              | 4.0448 | 2.0161 | 0.042366  | 1.373  |
| (1R,3S,5Z)-5-{{(2E)-2-[(1Z,3aS,7aS)-1-(6-Ethyl-6-hydroxy-3-octyn-2-ylidene)-7a-methyloctahydro-4H-inden-4-ylidene]ethylidene}-4-methylene-1,3-cyclohexanediol | 4.0919 | 2.0328 | 0.04633   | 1.3341 |
| 1-(4,6-Dimethoxy-1,3,5-triazin-2-yl)-8-methyl-1,2,3,4-tetrahydroquinoline                                                                                     | 4.8108 | 2.2663 | 0.044811  | 1.3486 |
| 4-(Hydroxymethyl)benzenesulfonic acid                                                                                                                         | 4.8158 | 2.2678 | 0.0019788 | 2.7036 |
| (2E)-N-[(3S)-2-Oxotetrahydro-3-furanyl]-2-dodecenamide                                                                                                        | 5.6221 | 2.4911 | 0.014135  | 1.8497 |
| (5Z,8Z,11Z,14Z)-N-(4-Sulfamoylphenyl)-5,8,11,14-icosatetraenamide                                                                                             | 5.8275 | 2.5429 | 0.023257  | 1.6335 |



**Table S7.** Untargeted metabolomic analysis in liver tissue of mice exposed to mixed polymer (2mg/week);  $p = 0.05$ . Data can be found in supplemental Excel Table S7.

**Table S8.**

| <b>Untargeted Metabolomic Analysis in Liver Tissue of Mice Exposed to Mixed Polymer (4mg/week) p = 0.05</b> | <b>FC</b> | <b>log2(FC)</b> | <b>raw.pval</b> | <b>-LOG10(p)</b> |
|-------------------------------------------------------------------------------------------------------------|-----------|-----------------|-----------------|------------------|
| <b>Lower</b>                                                                                                |           |                 |                 |                  |
| Palmitonitrile                                                                                              | 0.019556  | -5.6763         | 0.0023256       | 2.6335           |
| Cinnassiol C3                                                                                               | 0.075638  | -3.7247         | 0.00072344      | 3.1406           |
| 3-Nonyl-1H-pyrazole                                                                                         | 0.092625  | -3.4324         | 0.0081441       | 2.0892           |
| Arachidoyl Ethanolamide                                                                                     | 0.094228  | -3.4077         | 0.0021178       | 2.6741           |
| 2-Amino-1,3,4-octadecanetriol                                                                               | 0.12039   | -3.0542         | 0.0050234       | 2.299            |
| NP-019401                                                                                                   | 0.13125   | -2.9296         | 0.004194        | 2.3774           |
| Tridemorph                                                                                                  | 0.16251   | -2.6214         | 0.0066947       | 2.1743           |
| C20 sphinganine                                                                                             | 0.16251   | -2.6214         | 0.0066947       | 2.1743           |
| sphinganine                                                                                                 | 0.20631   | -2.2771         | 0.0020385       | 2.6907           |
| (E)-9-Isopropyl-6-methyl-5,9-decadiene-2-one                                                                | 0.23376   | -2.0969         | 0.0030405       | 2.5171           |
| 5-phenyl-N,N-bis(2-pyridinylmethyl)-1,3-oxazole-4-carboxamide                                               | 0.23878   | -2.0663         | 0.00043888      | 3.3577           |
| N-[(3E)-2-Hydroxy-3-octenoyl]glycine                                                                        | 0.24862   | -2.008          | 0.0019758       | 2.7043           |
| 3222                                                                                                        | 0.25044   | -1.9975         | 0.0046931       | 2.3285           |
| 2444643W XK                                                                                                 | 0.25671   | -1.9618         | 0.0058224       | 2.2349           |
| 5-Methoxyindole                                                                                             | 0.25795   | -1.9549         | 0.028846        | 1.5399           |
| 2,2'-Iminodipropan-1-ol                                                                                     | 0.26357   | -1.9237         | 0.00066543      | 3.1769           |
| 1-Oxo-1H-isochromene-3-carbaldehyde                                                                         | 0.27058   | -1.8859         | 0.0059783       | 2.2234           |
| Solacapine                                                                                                  | 0.27383   | -1.8686         | 0.02078         | 1.6824           |
| Gabapentin related compound E                                                                               | 0.27762   | -1.8488         | 0.00079405      | 3.1002           |
| 7-ketodeoxycholic acid                                                                                      | 0.27975   | -1.8378         | 0.035502        | 1.4497           |
| 6-(Methylthio)purine                                                                                        | 0.28534   | -1.8093         | 0.0007583       | 3.1202           |
| Serratanidine                                                                                               | 0.30958   | -1.6916         | 0.0033343       | 2.477            |
| FF-MAS                                                                                                      | 0.31689   | -1.6579         | 0.0077509       | 2.1106           |
| Phlegmarine                                                                                                 | 0.32295   | -1.6306         | 0.0012372       | 2.9076           |
| FG7175000                                                                                                   | 0.32419   | -1.6251         | 0.017843        | 1.7485           |
| 8-[(3,3-Dimethyl-2-oxiranyl)methyl]-7-methoxy-2H-chromen-2-one                                              | 0.34296   | -1.5439         | 0.048037        | 1.3184           |
| [Similar to: 1-ethyl 4-(2-oxo-1,2-diphenylethyl) succinate; _Mass: -152.2363 Da]                            | 0.36461   | -1.4556         | 0.0089337       | 2.049            |
| Dichloroacetic acid                                                                                         | 0.36614   | -1.4495         | 0.0027489       | 2.5608           |
| Azelaic acid                                                                                                | 0.39293   | -1.3477         | 0.0013435       | 2.8718           |
| Diglyme                                                                                                     | 0.39376   | -1.3446         | 0.0037171       | 2.4298           |
| dacisteine                                                                                                  | 0.39554   | -1.3381         | 0.013211        | 1.8791           |
| spisulosine                                                                                                 | 0.39751   | -1.3309         | 0.0027051       | 2.5678           |
| [Similar to: Ethyl-_-D-glucuronide; _Mass: -0.0364 Da]                                                      | 0.40261   | -1.3126         | 0.010686        | 1.9712           |
| Glutaryl carnitine                                                                                          | 0.41171   | -1.2803         | 0.002303        | 2.6377           |
| 1,2-Cyclohexanediol                                                                                         | 0.43139   | -1.2129         | 0.0078425       | 2.1055           |

|                                                                                          |         |         |            |        |
|------------------------------------------------------------------------------------------|---------|---------|------------|--------|
| Lauramide                                                                                | 0.4322  | -1.2102 | 0.0065226  | 2.1856 |
| Ergosterol                                                                               | 0.43816 | -1.1905 | 0.013593   | 1.8667 |
| Stearamide                                                                               | 0.44405 | -1.1712 | 0.0077637  | 2.1099 |
| all-trans-7-hydroxyhexadeca-2,4,8,10-tetraenoic acid                                     | 0.4498  | -1.1527 | 0.011339   | 1.9454 |
| Thalictroidine                                                                           | 0.45221 | -1.1449 | 0.0078041  | 2.1077 |
| Valpromide                                                                               | 0.45268 | -1.1434 | 0.0045605  | 2.341  |
| (2E)-2-Octenal                                                                           | 0.45268 | -1.1434 | 0.0045605  | 2.341  |
| Gabapentin                                                                               | 0.45374 | -1.1401 | 0.0081657  | 2.088  |
| N-[(9Z)-3-Hydroxy-9-octadecenoyl]glycine                                                 | 0.45421 | -1.1386 | 0.0080892  | 2.0921 |
| N-nonanoyl-L-Homoserine lactone                                                          | 0.45546 | -1.1346 | 0.0052358  | 2.281  |
| N-tetradecanoyl-4-hydroxysphinganine                                                     | 0.4595  | -1.1219 | 0.0089212  | 2.0496 |
| MFCD00674434                                                                             | 0.46155 | -1.1154 | 0.038871   | 1.4104 |
| Bis(2-ethylhexyl) amine                                                                  | 0.4647  | -1.1056 | 0.004417   | 2.3549 |
| Methyl (11E)-8-hydroxy-11,17-octadecadien-9-ynoate                                       | 0.46768 | -1.0964 | 0.00556    | 2.2549 |
| 2-[4-(3-Hydroxypropyl)-2-methoxyphenoxy]-1,3-propanediol                                 | 0.47374 | -1.0778 | 0.0026761  | 2.5725 |
| Camylofin                                                                                | 0.47936 | -1.0608 | 0.030489   | 1.5159 |
| 13(S)-HODE methyl ester                                                                  | 0.47954 | -1.0603 | 0.045993   | 1.3373 |
| Timonacic                                                                                | 0.47996 | -1.059  | 0.03092    | 1.5098 |
| Bialaphos                                                                                | 0.48075 | -1.0566 | 0.018      | 1.7447 |
| Capsi-amide                                                                              | 0.49059 | -1.0274 | 0.0095741  | 2.0189 |
| N-Acetylalanine                                                                          | 0.49396 | -1.0175 | 0.00036871 | 3.4333 |
| C17 Sphingosine                                                                          | 0.49836 | -1.0048 | 0.00024685 | 3.6076 |
| dimethylformamide                                                                        | 0.4989  | -1.0032 | 0.011518   | 1.9386 |
| <b>Higher</b>                                                                            |         |         |            |        |
| Zalcitabine                                                                              | 2.1559  | 1.1083  | 0.022836   | 1.6414 |
| methyl 8-[2-(2-formyl-vinyl)-3-hydroxy-5-oxo-cyclopentyl]-octanoate                      | 2.1587  | 1.1102  | 0.0030167  | 2.5205 |
| (9Z)-N-[(2S,3R,4E,6E)-1,3-Dihydroxy-4,6-tetradecadien-2-yl]-2-hydroxy-9-octadecenamamide | 2.1711  | 1.1184  | 0.032642   | 1.4862 |
| (+)-Corydaline                                                                           | 2.1738  | 1.1202  | 0.005373   | 2.2698 |
| 2-methoxy-17beta-estradiol 3-sulfate                                                     | 2.1768  | 1.1222  | 0.005917   | 2.2279 |
| N-methylmorphinan                                                                        | 2.1779  | 1.1229  | 0.0044862  | 2.3481 |
| 13-deoxytedanolide                                                                       | 2.1879  | 1.1295  | 0.0073565  | 2.1333 |
| 3,3',5,5'-tetramethylbenzidine                                                           | 2.1903  | 1.1311  | 0.0071517  | 2.1456 |
| (2S,3S)-2,3-dihydro-3-hydroxyanthranilic acid zwitterion                                 | 2.1966  | 1.1353  | 0.038403   | 1.4156 |
| 1,3,3-Trimethyl-2-oxabicyclo[2.2.2]oct-6-yl hexopyranoside                               | 2.236   | 1.161   | 0.048706   | 1.3124 |
| 4-[(Hydroxymethyl)(nitroso)amino]-1-(3-pyridinyl)-1-butanol                              | 2.2517  | 1.171   | 0.0070161  | 2.1539 |
| PCHP                                                                                     | 2.2551  | 1.1732  | 0.004414   | 2.3552 |
| Netilmicin                                                                               | 2.2551  | 1.1732  | 0.0061527  | 2.2109 |

|                                                                                                             |        |        |            |        |
|-------------------------------------------------------------------------------------------------------------|--------|--------|------------|--------|
| Cassaidine                                                                                                  | 2.2884 | 1.1943 | 0.0077794  | 2.1091 |
| O-pentadecanoylcarnitine                                                                                    | 2.2884 | 1.1943 | 0.0077794  | 2.1091 |
| 5,5',6',9'-Tetrahydroxy-8,8'-dimethoxy-2,2'-dimethyl-4H,4'H-7,7'-bibenzo[g]chromene-4,4',6,9-tetrone        | 2.2957 | 1.199  | 0.040238   | 1.3954 |
| PEG n13                                                                                                     | 2.34   | 1.2265 | 0.0056351  | 2.2491 |
| PEG n12                                                                                                     | 2.3429 | 1.2283 | 0.0056901  | 2.2449 |
| PEG n16                                                                                                     | 2.3618 | 1.2399 | 0.00559    | 2.2526 |
| PEG n14                                                                                                     | 2.3835 | 1.2531 | 0.0053899  | 2.2684 |
| RG5927903                                                                                                   | 2.3971 | 1.2613 | 0.0036752  | 2.4347 |
| (1S,4R,7S,9R)-9-Methyl-8-azatetracyclo[5.5.3.0~1,8~.0~4,9~]pentadec-5-ene                                   | 2.4077 | 1.2677 | 0.0049653  | 2.3041 |
| Indoxyl sulfate                                                                                             | 2.4149 | 1.272  | 0.014121   | 1.8501 |
| Oxohongdenafil                                                                                              | 2.4506 | 1.2932 | 0.0023974  | 2.6203 |
| Uric acid                                                                                                   | 2.4817 | 1.3113 | 0.00044648 | 3.3502 |
| naltrindole                                                                                                 | 2.547  | 1.3488 | 0.011466   | 1.9406 |
| 1-(2-Phenyl-2-propanyl)piperidine                                                                           | 2.5597 | 1.356  | 0.004667   | 2.331  |
| nicosulfuron [ANSI]                                                                                         | 2.573  | 1.3635 | 0.0029667  | 2.5277 |
| NP-017710                                                                                                   | 2.5973 | 1.377  | 0.0037341  | 2.4278 |
| CB5740000                                                                                                   | 2.6354 | 1.398  | 0.0097202  | 2.0123 |
| 8-(6-Carboxy-2,3,4-trihydroxyphenoxy)-3,4,9,10-tetrahydroxy-6-oxo-6H-benzo[c]chromene-1-carboxylic acid     | 2.6443 | 1.4029 | 0.0053627  | 2.2706 |
| Succinic acid                                                                                               | 2.6822 | 1.4234 | 0.0036719  | 2.4351 |
| Diacetoxyscirpenol                                                                                          | 2.7091 | 1.4378 | 0.0042251  | 2.3742 |
| Nifenazone                                                                                                  | 2.7941 | 1.4824 | 0.0020854  | 2.6808 |
| Microcystin-LA                                                                                              | 2.8925 | 1.5323 | 0.0013246  | 2.8779 |
| Tropicamide                                                                                                 | 2.9317 | 1.5517 | 0.013776   | 1.8609 |
| (1R,9S)-11-(1-Acetyl-4-piperidinyl)-5-(2-methylphenyl)-7,11-diazatricyclo[7.3.1.02,7]trideca-2,4-dien-6-one | 2.9978 | 1.5839 | 0.0036504  | 2.4377 |
| Imatinib                                                                                                    | 3.0164 | 1.5928 | 0.0030885  | 2.5103 |
| 4-Formyl-2-methoxyphenyl hydrogen sulfate                                                                   | 3.1261 | 1.6444 | 0.0087616  | 2.0574 |
| 2-(4,4-diphenyl-1-piperidinobuta-1,3-dienyl)phenyl acetate                                                  | 3.1698 | 1.6644 | 0.0023525  | 2.6285 |
| {{(3R,4S)-1-(Phenylacetyl)-3-[2-(4-phenyl-1-piperazinyl)ethyl]-4-piperidinyl}acetic acid                    | 3.2513 | 1.701  | 0.002696   | 2.5693 |
| Arachidonoyl ethanolamide phosphate                                                                         | 3.3367 | 1.7384 | 0.0027297  | 2.5639 |
| miglustat                                                                                                   | 3.3403 | 1.74   | 0.0061991  | 2.2077 |
| 4-Acetamidobenzoic acid                                                                                     | 3.3822 | 1.758  | 0.032728   | 1.4851 |
| GDC-0326                                                                                                    | 3.3911 | 1.7618 | 0.031017   | 1.5084 |
| [Similar to: 7-Oxobenz[de]anthracene; _Mass: -7.9880 Da]                                                    | 3.5088 | 1.811  | 0.037789   | 1.4226 |
| Hippuric acid                                                                                               | 3.5153 | 1.8137 | 0.027494   | 1.5608 |

|                                                                                                                                                              |        |        |            |        |
|--------------------------------------------------------------------------------------------------------------------------------------------------------------|--------|--------|------------|--------|
| guaiacol sulfate                                                                                                                                             | 3.8654 | 1.9506 | 0.030288   | 1.5187 |
| Benzoic acid                                                                                                                                                 | 3.8871 | 1.9587 | 0.025745   | 1.5893 |
| (1R,3S,5Z)-5-{(2E)-2-[(1Z,3aS,7aS)-1-(6-Ethyl-6-hydroxy-3-octyn-2-ylidene)-7a-methyloctahydro-4H-inden-4-ylidene]ethylidene}-4-methylene-1,3-cyclohexanediol | 3.9939 | 1.9978 | 0.042469   | 1.3719 |
| Acetanilide                                                                                                                                                  | 4.0117 | 2.0042 | 0.016723   | 1.7767 |
| Victoria Pure Blue BO                                                                                                                                        | 4.216  | 2.0759 | 0.0054731  | 2.2618 |
| 2-Methylhippuric Acid                                                                                                                                        | 4.3662 | 2.1264 | 0.00062871 | 3.2016 |
| (2E)-N-[(3S)-2-Oxotetrahydro-3-furanyl]-2-dodecenamide                                                                                                       | 4.7227 | 2.2396 | 0.0046099  | 2.3363 |
| Iprovalicarb                                                                                                                                                 | 4.7327 | 2.2427 | 0.024766   | 1.6061 |
| 6-Acetamido-2-oxohexanoic acid                                                                                                                               | 5.2986 | 2.4056 | 0.036051   | 1.4431 |
| (5Z,8Z,11Z,14Z)-N-(4-Sulfamoylphenyl)-5,8,11,14-icosatetraenamide                                                                                            | 5.5231 | 2.4655 | 0.02353    | 1.6284 |
| Nicotinic acid                                                                                                                                               | 14.498 | 3.8578 | 0.00024801 | 3.6055 |
| 4-(Hydroxymethyl)benzenesulfonic acid                                                                                                                        | 23.537 | 4.5569 | 2.75E-05   | 4.5611 |

**Table S8.** Untargeted metabolomic analysis in liver tissue of mice exposed to mixed polymer (4mg/week);  $p = 0.05$ . Data can be found in supplemental Excel Table S8.

**Table S9.**

| <b>Untargeted Metabolomic Analysis in Brain<br/>Tissue of Mice Exposed to Polystyrene<br/>(2mg/week) p = 0.05</b> | <b>FC</b> | <b>log2(FC)</b> | <b>raw.pval</b> | <b>-LOG10(p)</b> |
|-------------------------------------------------------------------------------------------------------------------|-----------|-----------------|-----------------|------------------|
| <b>Lower</b>                                                                                                      |           |                 |                 |                  |
| MFCD00467154                                                                                                      | 0.18404   | -2.4419         | 2.18E-05        | 4.662            |
| N'-[(3Z)-1-(Cyclohexylmethyl)-2-oxo-1,2-dihydro-3H-indol-3-ylidene]benzohydrazide                                 | 0.20024   | -2.3202         | 0.0041887       | 2.3779           |
| 3-Methoxytyramine                                                                                                 | 0.24779   | -2.0128         | 0.0035842       | 2.4456           |
| 4-Anisic acid                                                                                                     | 0.37083   | -1.4312         | 0.034659        | 1.4602           |
| 5-Hydroxy-2-furoic acid                                                                                           | 0.4189    | -1.2553         | 0.034717        | 1.4595           |
| 3-Amino-5-hydroxybenzoic acid                                                                                     | 0.48286   | -1.0503         | 0.0054427       | 2.2642           |
| 1581740                                                                                                           | 0.48373   | -1.0477         | 9.91E-05        | 4.0037           |
| Benzamidine                                                                                                       | 0.49396   | -1.0175         | 0.022355        | 1.6506           |
| <b>Higher</b>                                                                                                     |           |                 |                 |                  |
| 3,4-Dihydroxyphenylacetic acid                                                                                    | 2.3187    | 1.2133          | 0.042961        | 1.3669           |
| [Similar to: Sphingosine (d18:1); _Mass: -0.1092 Da]                                                              | 2.4256    | 1.2783          | 0.046052        | 1.3368           |
| 5-({5-[(3,5-Dihydroxydecanoyl)oxy]-3-hydroxydecanoyl}oxy)-3-hydroxydecanoic acid                                  | 2.5454    | 1.3479          | 0.0179          | 1.7471           |
| methypylon                                                                                                        | 2.6226    | 1.391           | 0.0038912       | 2.4099           |
| Anapheline                                                                                                        | 3.2886    | 1.7175          | 0.019241        | 1.7158           |
| (2S,3S)-2-hydroxytridecane-1,2,3-tricarboxylic acid                                                               | 3.2895    | 1.7179          | 0.006238        | 2.205            |
| 3-({3-[(6-Deoxy-alpha-L-mannopyranosyl)oxy]undecanoyl}oxy)decanoic acid                                           | 4.6671    | 2.2225          | 0.0023429       | 2.6302           |

**Table S9.** Untargeted metabolomic analysis in brain tissue of mice exposed to polystyrene (2mg/week);  $p = 0.05$ . Data can be found in supplemental Excel Table S9.



**Table S10.**

| <b>Untargeted Metabolomic Analysis in Brain<br/>Tissue of Mice Exposed to Polystyrene<br/>(4mg/week)<br/>p = 0.05</b> | <b>FC</b> | <b>log2(FC)</b> | <b>raw.pval</b> | <b>-LOG10(p)</b> |
|-----------------------------------------------------------------------------------------------------------------------|-----------|-----------------|-----------------|------------------|
| <b>Lower</b>                                                                                                          |           |                 |                 |                  |
| MFCD00467154                                                                                                          | 0.25061   | -1.9965         | 0.00074465      | 3.128            |
| 3-Methoxytyramine                                                                                                     | 0.39271   | -1.3485         | 0.03358         | 1.4739           |
| <b>Higher</b>                                                                                                         |           |                 |                 |                  |
| (2S)-2,3-Dihydroxypropyl (11Z)-11-icosenoate                                                                          | 2.0155    | 1.0112          | 0.042147        | 1.3752           |
| N-Undecanoylglycine                                                                                                   | 2.1394    | 1.0972          | 0.027333        | 1.5633           |
| N-Octanoyl-L-Homoserine lactone                                                                                       | 2.1394    | 1.0972          | 0.027333        | 1.5633           |
| Docosaenoyl Ethanolamide                                                                                              | 2.1458    | 1.1015          | 0.0087426       | 2.0584           |
| Allylacetone                                                                                                          | 2.1866    | 1.1287          | 0.042698        | 1.3696           |
| Cyprodenate                                                                                                           | 2.1922    | 1.1324          | 0.021594        | 1.6657           |
| (3E)-4-(4-Hydroxy-2,6,6-trimethyl-1-cyclohexen-1-yl)-3-buten-2-one                                                    | 2.1942    | 1.1337          | 0.028693        | 1.5422           |
| 4-(2,6,6-Trimethylcyclohexa-1,3-dienyl)but-3-en-2-one                                                                 | 2.274     | 1.1852          | 0.026947        | 1.5695           |
| Hexylbenzene                                                                                                          | 2.3129    | 1.2097          | 0.019185        | 1.717            |
| 1,4-Nonanediol diacetate                                                                                              | 2.3146    | 1.2108          | 0.021878        | 1.66             |
| Luciduline                                                                                                            | 2.3385    | 1.2256          | 0.0066151       | 2.1795           |
| (4E)-4-Methyl-4-hexen-3-one                                                                                           | 2.3679    | 1.2436          | 0.032756        | 1.4847           |
| 1,3,5-Heptatriene                                                                                                     | 2.3798    | 1.2508          | 0.032334        | 1.4903           |
| 2,4-OCTADIENAL                                                                                                        | 2.4868    | 1.3143          | 0.036462        | 1.4382           |
| 1,1,6-Trimethyl-1,2-dihydronaphthalene                                                                                | 2.504     | 1.3243          | 0.044919        | 1.3476           |
| n-Amylbenzene                                                                                                         | 2.5142    | 1.3301          | 0.025391        | 1.5953           |
| Guanethidine                                                                                                          | 2.5215    | 1.3343          | 0.013785        | 1.8606           |
| (8S,17Z,28E,30R)-17,28-Dotriacontadiene-2,4,6,15,31-pentayne-1,8,30-triol                                             | 3.186     | 1.6718          | 0.029707        | 1.5271           |
| [Similar to: Sphingosine (d18:1); _Mass: -0.1092 Da]                                                                  | 3.5539    | 1.8294          | 0.020307        | 1.6924           |

**Table S10.** Untargeted metabolomic analysis in brain tissue of mice exposed to polystyrene (4mg/week);  $p = 0.05$ . Data can be found in supplemental Excel Table S10.

**Table S11.**

| <b>Untargeted Metabolomic Analysis in Brain Tissue of Mice Exposed to Mixed Polymer (2mg/week) p = 0.05</b> | <b>FC</b> | <b>log2(FC)</b> | <b>raw.pval</b> | <b>-LOG10(p)</b> |
|-------------------------------------------------------------------------------------------------------------|-----------|-----------------|-----------------|------------------|
| <b>Lower</b>                                                                                                |           |                 |                 |                  |
| ACETYL PROLINE                                                                                              | 0.41924   | -1.2541         | 0.023976        | 1.6202           |
| <b>Higher</b>                                                                                               |           |                 |                 |                  |
| 9-Hexadecenoylcarnitine                                                                                     | 2.0821    | 1.058           | 0.0087872       | 2.0562           |
| Norisocorydine                                                                                              | 2.497     | 1.3202          | 0.011574        | 1.9365           |
| 1,2,4-Butanetriol                                                                                           | 2.6737    | 1.4189          | 0.045681        | 1.3403           |
| beta-D-Ethyl glucuronide                                                                                    | 2.8474    | 1.5097          | 0.0091114       | 2.0404           |
| DL-Citrulline                                                                                               | 4.1916    | 2.0675          | 0.020591        | 1.6863           |
| 2-O-methylcytosine                                                                                          | 4.2073    | 2.0729          | 0.030687        | 1.513            |
| Sulbactam                                                                                                   | 5.0679    | 2.3414          | 0.018464        | 1.7337           |
| pp3                                                                                                         | 5.0915    | 2.3481          | 0.021432        | 1.6689           |
| 3-Hydroxy Darifenacin                                                                                       | 5.2538    | 2.3934          | 0.041738        | 1.3795           |
| [Similar to: 2-(4,4-diphenyl-1-piperidinobuta-1,3-dienyl)phenyl acetate; _Mass: -162.0873 Da]               | 5.4804    | 2.4543          | 0.030398        | 1.5172           |
| Methylenediurea                                                                                             | 5.721     | 2.5163          | 0.029217        | 1.5344           |
| 2-Amino-4-[(3-aminopropyl)amino]butanoic acid                                                               | 13.555    | 3.7608          | 0.025114        | 1.6001           |

**Table S11.** Untargeted metabolomic analysis in brain tissue exposed to mixed polymer (2mg/week);  $p = 0.05$ . Data can be found in supplemental Excel Table S11.

**Table S12.**

| Untargeted Metabolomic Analysis in Brain Tissue of Mice Exposed to Mixed Polymer (4mg/week)<br>p = 0.05  | FC      | log2(FC) | raw.pval   | (-LOG10(p)) |
|----------------------------------------------------------------------------------------------------------|---------|----------|------------|-------------|
| <b>Lower</b>                                                                                             |         |          |            |             |
| [Similar to: Inosine-5'-monophosphate (IMP);<br>_Mass: 0.0127 Da]                                        | 0.11073 | -3.1749  | 0.00010683 | 3.9713      |
| 2-[(5-Nitro-1,3-thiazol-2-yl)carbamoyl]phenyl D-glucopyranosiduronic acid                                | 0.1632  | -2.6153  | 6.23E-05   | 4.2052      |
| Acetyl-L-methionine                                                                                      | 0.19238 | -2.3779  | 0.017314   | 1.7616      |
| HIAA                                                                                                     | 0.20711 | -2.2715  | 0.029103   | 1.5361      |
| Timonacic                                                                                                | 0.2408  | -2.0541  | 0.02149    | 1.6678      |
| Goitrin                                                                                                  | 0.24427 | -2.0335  | 0.027086   | 1.5672      |
| S-Farnesyl Thioacetic Acid                                                                               | 0.24817 | -2.0106  | 0.026264   | 1.5806      |
| L-(-)-Methionine                                                                                         | 0.30422 | -1.7168  | 0.035337   | 1.4518      |
| 3-Methylsulfolene                                                                                        | 0.30423 | -1.7168  | 0.035365   | 1.4514      |
| Sulfanilic acid                                                                                          | 0.3064  | -1.7065  | 0.027568   | 1.5596      |
| 3-(Sulfooxy)-L-tyrosine                                                                                  | 0.33744 | -1.5673  | 0.028539   | 1.5446      |
| fMet                                                                                                     | 0.35441 | -1.4965  | 0.03438    | 1.4637      |
| Homocysteine thiolactone                                                                                 | 0.35444 | -1.4964  | 0.034461   | 1.4627      |
| D-Glucopyranuronic acid                                                                                  | 0.35816 | -1.4813  | 0.013464   | 1.8708      |
| e-Tokoferol                                                                                              | 0.3602  | -1.4731  | 0.017672   | 1.7527      |
| [Similar to: 4-Dodecylbenzenesulfonic acid;<br>_Mass: 98.0478 Da]                                        | 0.44889 | -1.1556  | 0.0021113  | 2.6754      |
| ACETYL PROLINE                                                                                           | 0.45016 | -1.1515  | 0.02704    | 1.568       |
| D-Xylulosonic acid                                                                                       | 0.48724 | -1.0373  | 0.00015767 | 3.8022      |
| <b>Higher</b>                                                                                            |         |          |            |             |
| 2-[3,5-Dihydroxy-4-(sulfooxy)phenyl]-5,7-dihydroxy-3,4-dihydro-2H-chromen-3-yl 3,4,5-trihydroxybenzoate  | 2.0225  | 1.0162   | 0.00074956 | 3.1252      |
| ioprocecemic acid                                                                                        | 2.0326  | 1.0233   | 0.0087689  | 2.0571      |
| [Similar to: Inosine-5'-monophosphate (IMP);<br>_Mass: 97.9767 Da]                                       | 2.0398  | 1.0284   | 0.0017951  | 2.7459      |
| Caprolactam                                                                                              | 2.059   | 1.0419   | 1.21E-05   | 4.9183      |
| (2Z)-5-(1,2,4a,5-tetramethyl-7-oxo-1,2,3,4,4a,7,8,8a-octahydronaphthalen-1-yl)-3-methylpent-2-enoic acid | 2.1267  | 1.0886   | 0.0039953  | 2.3985      |
| methylguanidine                                                                                          | 2.1453  | 1.1012   | 8.50E-05   | 4.0708      |
| N-Methylisopelletierine                                                                                  | 2.1893  | 1.1305   | 7.42E-05   | 4.1297      |
| (2S,4S,6S,8S,10S,12R,14R,16R,18R)-19-Hydroxy-2,4,6,8,10,12,14,16,18-nonamethylhexatriacontanoic acid     | 2.2083  | 1.1429   | 0.0024868  | 2.6044      |
| Dyphylline                                                                                               | 2.229   | 1.1564   | 0.035645   | 1.448       |
| Phenazone                                                                                                | 2.4407  | 1.2873   | 0.010558   | 1.9764      |
| Aliskiren                                                                                                | 2.4422  | 1.2882   | 0.030334   | 1.5181      |

|                                                                                               |        |        |            |        |
|-----------------------------------------------------------------------------------------------|--------|--------|------------|--------|
| Cyano(3-phenoxyphenyl)methyl 2,2-dimethyl-3-(1,2,2,2-tetrabromoethyl)cyclopropanecarboxylate  | 2.4712 | 1.3052 | 0.015213   | 1.8178 |
| MFCD00467154                                                                                  | 2.4898 | 1.316  | 0.0047407  | 2.3242 |
| Kukoamine A                                                                                   | 2.566  | 1.3595 | 0.00092207 | 3.0352 |
| DL-TYROSINE                                                                                   | 2.7908 | 1.4807 | 0.0059852  | 2.2229 |
| 3,4-Dimethylbenzoic acid                                                                      | 2.8952 | 1.5337 | 0.020508   | 1.6881 |
| Norisocorydine                                                                                | 2.8962 | 1.5342 | 0.0073437  | 2.1341 |
| beta-D-Ethyl glucuronide                                                                      | 2.9459 | 1.5587 | 0.030876   | 1.5104 |
| Sulbactam                                                                                     | 3.1019 | 1.6331 | 0.018711   | 1.7279 |
| Squalene                                                                                      | 4.4364 | 2.1494 | 0.0013748  | 2.8618 |
| HC Blue 1                                                                                     | 4.5046 | 2.1714 | 0.039908   | 1.3989 |
| 9-Hexadecenoylcarnitine                                                                       | 5.0738 | 2.3431 | 0.017857   | 1.7482 |
| 2-amino-3-ketobutyric acid                                                                    | 5.8832 | 2.5566 | 0.033645   | 1.4731 |
| 2-O-methylcytosine                                                                            | 6.5839 | 2.7189 | 0.0253     | 1.5969 |
| DL-Citrulline                                                                                 | 6.8841 | 2.7833 | 0.0077373  | 2.1114 |
| Methylenediurea                                                                               | 7.0728 | 2.8223 | 0.0010448  | 2.981  |
| [Similar to: 2-(4,4-diphenyl-1-piperidinobuta-1,3-dienyl)phenyl acetate; _Mass: -162.0873 Da] | 10.799 | 3.4328 | 0.00092639 | 3.0332 |
| 1-Nitrosopiperidine (NPIP)                                                                    | 17.03  | 4.09   | 0.022003   | 1.6575 |
| 2-Amino-4-[(3-aminopropyl)amino]butanoic acid                                                 | 21.03  | 4.3944 | 0.00049211 | 3.3079 |

**Table S12.** Untargeted metabolomic analysis in brain tissue of mice exposed to mixed polymer (4mg/week);  $p = 0.05$ . Data can be found in supplemental Excel Table S12.

**Table S13.**

| A. Targeted Metabolomics of Colon in Mice Exposed to Polystyrene (2mg/week) | FC      | log2(FC) | raw.pval | -log10(p) |
|-----------------------------------------------------------------------------|---------|----------|----------|-----------|
| <b>Lower</b>                                                                |         |          |          |           |
| Melatonin                                                                   | 0.13169 | -2.9248  | 0.022623 | 1.6454    |
| <b>Higher</b>                                                               |         |          |          |           |
| 5-Hydroxytryptophan                                                         | 16.172  | 4.0154   | 0.021521 | 1.6671    |

| B. Targeted Metabolomics of Colon in Mice Exposed to Polystyrene (4mg/week) | FC     | log2(FC) | raw.pval | -log10(p) |
|-----------------------------------------------------------------------------|--------|----------|----------|-----------|
| <b>Higher</b>                                                               |        |          |          |           |
| 5-Hydroxytryptophan                                                         | 43.173 | 5.4321   | 0.028309 | 1.5481    |



**Table S13.** Targeted Metabolomics of Colon in Mice Exposed to Polystyrene showing significantly altered metabolites for concentrations A) 2mg/week and B) 4mg/week.

Table S14.

| A. Targeted Metabolomics of Colon in Mice Exposed to Mixed Polymer (2mg/week) | FC       | log2(FC) | raw.pval  | -log(10)p |
|-------------------------------------------------------------------------------|----------|----------|-----------|-----------|
| <b>Lower</b>                                                                  |          |          |           |           |
| ADP ribose                                                                    | 0.051106 | -4.2904  | 0.028892  | 1.5392    |
| Nicotinamide                                                                  | 0.17804  | -2.4898  | 0.0063979 | 2.194     |
| <b>Higher</b>                                                                 |          |          |           |           |
| Melatonin                                                                     | 2.5207   | 1.3338   | 0.036607  | 1.4364    |
| N'-Formylkynurenine                                                           | 48.344   | 5.5953   | 0.026892  | 1.5704    |
| Xanthurenic acid                                                              | 91.706   | 6.5189   | 0.015512  | 1.8093    |
| Kynurenic acid                                                                | 435.75   | 8.7674   | 0.0042819 | 2.3684    |

  

| B. Targeted Metabolomics of Colon in Mice Exposed to Mixed Polymer (4mg/week) | FC        | log2(FC) | raw.pval  | -log(10)p |
|-------------------------------------------------------------------------------|-----------|----------|-----------|-----------|
| <b>Lower</b>                                                                  |           |          |           |           |
| Indole                                                                        | 0.0038223 | -8.0313  | 0.02725   | 1.5646    |
| NICOTINIC ACID ADENINE DINUCLEOTIDE                                           | 0.082634  | -3.5971  | 0.0086219 | 2.0644    |
| Nicotinic acid                                                                | 0.11305   | -3.145   | 0.0094296 | 2.0255    |
| NAD                                                                           | 0.14977   | -2.7392  | 0.041662  | 1.3803    |
| <b>Higher</b>                                                                 |           |          |           |           |
| Melatonin                                                                     | 3.1744    | 1.6665   | 0.032836  | 1.4836    |
| N'-Formylkynurenine-†                                                         | 39.422    | 5.3009   | 0.022044  | 1.6567    |
| Xanthurenic acid                                                              | 353.05    | 8.4637   | 0.026914  | 1.57      |
| Kynurenic acid                                                                | 859.43    | 9.7472   | 0.01023   | 1.9901    |

**Table S14.** Targeted Metabolomics of Colon in Mice Exposed to Mixed Polymer showing significantly altered metabolites for concentrations A) 2mg/week and B) 4mg/week.
