# Supplementary material
Source: PubMed Central journal article supplement (PMC11005960)
Supplement: ehp13435.smcontents.508.pdf [file ehp13435.smcontents.508.pdf]

**Note to readers with disabilities:** *EHP* strives to ensure that all journal content is accessible to all readers. However, some figures and Supplemental Material published in *EHP* articles may not conform to [508 standards](#) due to the complexity of the information being presented. If you need assistance accessing journal content, please contact [ehp508@niehs.nih.gov](mailto:ehp508@niehs.nih.gov). Our staff will work with you to assess and meet your accessibility needs within 3 working days.

### **Supplemental Material**

#### ***In Vivo* Tissue Distribution of Polystyrene or Mixed Polymer Microspheres and Metabolomic Analysis after Oral Exposure in Mice**

Marcus M. Garcia, Aaron S. Romero, Seth D. Merkley, Jewel L. Meyer-Hagen, Charles Forbes, Eliane El Hayek, David P. Sciezka, Rachel Templeton, Jorge Gonzalez-Estrella, Yan Jin, Haiwei Gu, Angelica Benavidez, Russell P. Hunter, Selita Lucas, Guy Herbert, Kyle Joohyung Kim, Julia Yue Cui, Rama R. Gullapalli, Julie G. In, Matthew J. Campen, and Eliseo F. Castillo

#### **Table of Contents**

**Figure S1.** Raman Spectroscopy in the liver.

**Figure S2.** Targeted metabolomics in colon.

**Figure S3.** Targeted metabolomics in liver.

**Figure S4.** Targeted metabolomics in brain.

**Table S1.** Untargeted metabolomics analysis in colon tissue of mice exposed to polystyrene (2mg/week);  $p = 0.05$ . Data can be found in supplemental Excel Table S1.

**Table S2.** Untargeted metabolomic analysis in colon tissue of mice exposed to polystyrene (4mg/week);  $p = 0.05$ . Data can be found in supplemental Excel Table S2.

**Table S3.** Untargeted metabolomic analysis in colon tissue of mice exposed to mixed polymer (2mg/week);  $p = 0.05$ . Data can be found in supplemental Excel Table S3.

**Table S4.** Untargeted metabolomic analysis in colon tissue of mice exposed to mixed polymer microspheres (4mg/week);  $p = 0.05$ . Data can be found in supplemental Excel Table S4.

**Table S5.** Untargeted metabolomic analysis in liver tissue of mice exposed to polystyrene (2mg/week);  $p = 0.05$ . Data can be found in supplemental Excel Table S5.

**Table S6.** Untargeted metabolomic analysis in liver tissue of mice exposed to polystyrene (4mg/week);  $p = 0.05$ . Data can be found in supplemental Excel Table S6.

**Table S7.** Untargeted metabolomic analysis in liver tissue of mice exposed to mixed polymer (2mg/week);  $p = 0.05$ . Data can be found in supplemental Excel Table S7.

**Table S8.** Untargeted metabolomic analysis in liver tissue of mice exposed to mixed polymer (4mg/week);  $p = 0.05$ . Data can be found in supplemental Excel Table S8.

**Table S9.** Untargeted metabolomic analysis in brain tissue of mice exposed to polystyrene (2mg/week);  $p = 0.05$ . Data can be found in supplemental Excel Table S9.

**Table S10.** Untargeted metabolomic analysis in brain tissue of mice exposed to polystyrene (4mg/week);  $p = 0.05$ . Data can be found in supplemental Excel Table S10.

**Table S11.** Untargeted metabolomic analysis in brain tissue exposed to mixed polymer (2mg/week);  $p = 0.05$ . Data can be found in supplemental Excel Table S11.

**Table S12.** Untargeted metabolomic analysis in brain tissue of mice exposed to mixed polymer (4mg/week);  $p = 0.05$ . Data can be found in supplemental Excel Table S12.

**Table S13.** Targeted Metabolomics of Colon in Mice Exposed to Polystyrene showing significantly altered metabolites for concentrations A) 2mg/week and B) 4mg/week.

**Table S14.** Targeted Metabolomics of Colon in Mice Exposed to Mixed Polymer showing significantly altered metabolites for concentrations A) 2mg/week and B) 4mg/week.

**Additional File-** Excel Document
